# Supplementary material
Source: PubMed Central journal article supplement (PMC3770781)
Supplement: NIHMS458572-supplement-1_si_001.pdf [file NIHMS458572-supplement-1_si_001.pdf]

## Supporting Information for

**H–H and Si–H Bond Addition to Fe=NNR<sub>2</sub> Intermediates Derived from N<sub>2</sub>**

Daniel L. M. Suess and Jonas C. Peters\*

Division of Chemistry and Chemical Engineering  
California Institute of Technology  
Pasadena, CA 91125 United StatesTable of Contents

|      |                                        |
|------|----------------------------------------|
| S2   | Fe–BCC and C–B bond correlations table |
| S3   | DFT study of <b>6a</b>                 |
| S7   | Experimental procedures                |
| S12  | NMR spectra                            |
| S23  | UV/vis spectra                         |
| S27  | IR spectra                             |
| S30  | XRD Tables                             |
| S149 | References                             |

**Table S1.** Structural correlations between Fe–BCC and C–C bond lengths.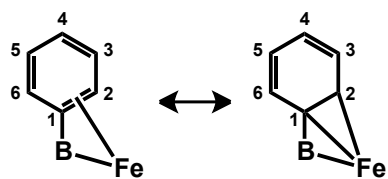

|                       | Fe-B             | Fe-C1            | Fe-C2            | C1-C2             | C2-C3             | C3-C4             | C4-C5             | C5-C6             | C6-C1             |
|-----------------------|------------------|------------------|------------------|-------------------|-------------------|-------------------|-------------------|-------------------|-------------------|
| <b>3a</b>             | 2.3234(11)       | 2.2608(9)        | 2.5486(11)       | 1.4191(14)        | 1.3891(18)        | 1.3977(15)        | 1.3935(18)        | 1.3880(16)        | 1.4212(15)        |
| <b>3b</b>             | 2.330(4)         | 2.193(3)         | 2.692(4)         | 1.402(5)          | 1.384(5)          | 1.369(5)          | 1.377(5)          | 1.379(5)          | 1.422(5)          |
| <b>4<sup>a</sup></b>  | <i>2.3740(7)</i> | <i>2.2517(6)</i> | <i>2.2715(7)</i> | <i>1.4211(10)</i> | <i>1.4185(10)</i> | <i>1.3711(12)</i> | <i>1.4124(12)</i> | <i>1.3785(10)</i> | <i>1.4303(10)</i> |
|                       | 2.3134(7)        | 2.2134(6)        | 2.6645(7)        | 1.4167(10)        | 1.3987(11)        | 1.3839(14)        | 1.3944(15)        | 1.3890(12)        | 1.4184(10)        |
| <b>6a<sup>b</sup></b> | <i>2.3768(6)</i> | <i>2.1493(5)</i> | <i>2.3405(6)</i> | <i>1.4231(7)</i>  | <i>1.4238(8)</i>  | <i>1.3681(9)</i>  | <i>1.4196(10)</i> | <i>1.3690(8)</i>  | <i>1.4324(7)</i>  |
|                       | 2.4288(7)        | 2.1440(6)        | 2.2266(6)        | 1.4285(9)         | 1.4357(9)         | 1.3645(13)        | 1.4223(13)        | 1.3648(9)         | 1.4372(9)         |
| <b>6b</b>             | 2.4242(10)       | 2.1542(9)        | 2.2041(9)        | 1.4356(13)        | 1.4342(13)        | 1.3641(16)        | 1.4218(17)        | 1.3680(14)        | 1.4365(13)        |

Italicized entries display alternating C–C bonds. (a) two Fe centers per molecule. (b) two molecules per asymmetric unit.

**Chart S1.** DFT study of **6a**: molecular orbital analysis

Geometry optimized using Gaussian09 Revision B.01<sup>1</sup> at the M06L/6-31g(d) level. Initial atomic coordinates were taken from one of the two unique molecules in the XRD structure. Molecular orbitals shown with 0.05 isosurfaces.

Frontier molecular orbitals

LUMO (-1.8 eV)

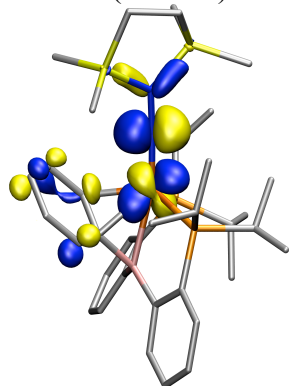

LUMO+1 (-1.3 eV)

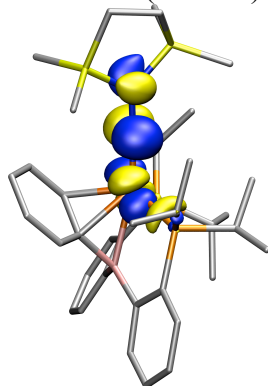

LUMO+2 (-0.8 eV)

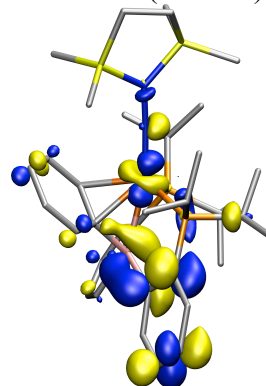

HOMO-2 (-4.0 eV)

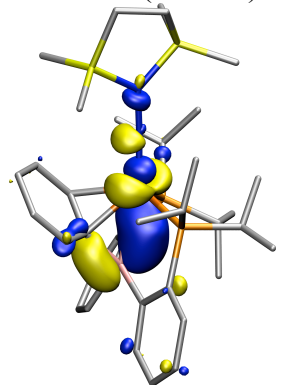

HOMO-1 (-3.7 eV)

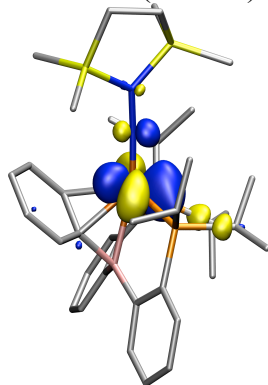

HOMO (-3.4 eV)

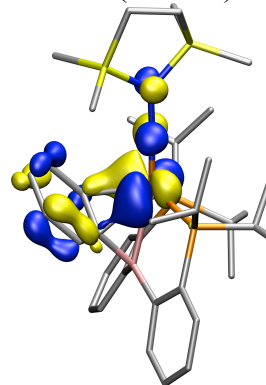Orbitals with Fe-aryl bonding character

HOMO-10 (-6.2 eV)

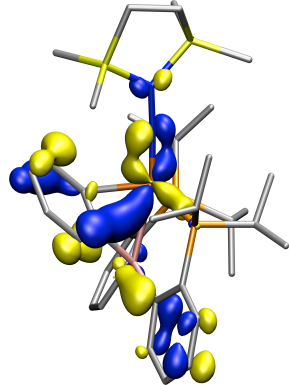

HOMO-9 (-5.9 eV)

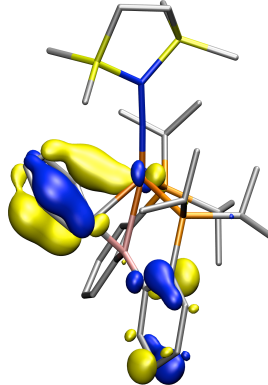

**Table S2.** Comparison of selected experimental and DFT-optimized bond lengths in **6a** (Å)

|             | XRD       | Calc  |
|-------------|-----------|-------|
| Fe-P (avg.) | 2.246     | 2.222 |
| Fe-B        | 2.4288(7) | 2.382 |
| Fe-Cipso    | 2.1440(6) | 2.119 |
| Fe-Cortho   | 2.2266(6) | 2.197 |
| Fe-N        | 1.6658(5) | 1.647 |
| N-N         | 1.3242(7) | 1.327 |

**Table S3.** Atomic coordinates of DFT-optimized **6a**

| Atom | x       | y       | z       |
|------|---------|---------|---------|
| Fe1  | 0.0127  | -0.0812 | 0.2109  |
| P2   | 1.1256  | -1.7899 | -0.6322 |
| P3   | 0.626   | 1.7803  | -0.8701 |
| Si4  | -4.0082 | -0.7725 | -1.2819 |
| Si5  | -3.9552 | 0.344   | 1.4818  |
| N6   | -1.6282 | -0.159  | 0.0948  |
| N7   | -2.9549 | -0.1795 | 0.0627  |
| C8   | 3.0348  | -1.2199 | 1.0863  |
| C9   | 2.4588  | -2.342  | 0.463   |
| C10  | 2.0608  | -1.758  | -2.2712 |
| C11  | -0.71   | -0.6876 | 3.2645  |
| C12  | 1.1147  | 0.3625  | 1.9654  |
| C13  | 4.1682  | -1.4467 | 1.8813  |
| C14  | 2.2352  | 2.4185  | -0.3125 |
| C15  | 2.9857  | 1.4775  | 0.4245  |
| C16  | 0.812   | 1.5796  | 2.6519  |
| C17  | 4.3105  | 1.8261  | 0.7383  |
| C18  | -0.1555 | 1.6421  | 3.6211  |
| C19  | 0.0397  | -3.2885 | -0.8458 |
| C20  | 2.9644  | -3.6326 | 0.6352  |
| C21  | -0.4719 | 3.2919  | -0.8029 |
| B22  | 2.2663  | 0.1682  | 0.942   |
| C23  | 4.8375  | 3.0704  | 0.4094  |
| C24  | 0.9002  | 1.558   | -2.7207 |
| C25  | 3.3626  | -0.9719 | -2.1377 |
| C26  | 0.3097  | -0.7859 | 2.27    |
| C27  | 4.0888  | -3.8256 | 1.4328  |
| C28  | 4.0496  | 4.0168  | -0.2449 |
| C29  | -0.9318 | 0.4906  | 3.927   |
| C30  | -0.9572 | -3.0414 | -1.9658 |

|     |         |         |         |
|-----|---------|---------|---------|
| C31 | 1.1355  | 2.8316  | -3.52   |
| C32 | -0.5087 | 3.8766  | 0.6002  |
| C33 | 4.6906  | -2.7277 | 2.0469  |
| C34 | 2.7483  | 3.6863  | -0.6091 |
| C35 | -1.8724 | 2.9913  | -1.3214 |
| C36 | -0.6727 | -3.6389 | 0.454   |
| C37 | -5.6489 | 0.3357  | 0.627   |
| C38 | 2.3779  | -3.1408 | -2.8327 |
| C39 | -0.1809 | 0.7053  | -3.3729 |
| C40 | -3.3627 | -0.4532 | -3.0046 |
| C41 | -5.4624 | 0.3553  | -0.8983 |
| C42 | -3.4316 | 2.0388  | 2.0557  |
| C43 | -4.4549 | -2.5711 | -0.9805 |
| C44 | -3.9617 | -0.9502 | 2.8461  |
| H45 | 1.3996  | -1.2339 | -2.9759 |
| H46 | 0.6986  | -4.126  | -1.122  |
| H47 | -0.0079 | 4.0366  | -1.4703 |
| H48 | 1.8335  | 0.98    | -2.7296 |
| H49 | 3.7818  | -0.7653 | -3.1315 |
| H50 | 4.1085  | -1.5491 | -1.5761 |
| H51 | 3.2405  | -0.0178 | -1.6134 |
| H52 | -1.6085 | -3.9111 | -2.129  |
| H53 | -0.4763 | -2.8004 | -2.9237 |
| H54 | -1.5919 | -2.1884 | -1.6961 |
| H55 | 1.4061  | 2.5817  | -4.5548 |
| H56 | 1.9493  | 3.438   | -3.1076 |
| H57 | 0.232   | 3.4543  | -3.5694 |
| H58 | -0.9027 | 3.1538  | 1.3226  |
| H59 | 0.4905  | 4.1696  | 0.9433  |
| H60 | -1.1527 | 4.7663  | 0.6276  |
| H61 | -2.3261 | 2.1585  | -0.7691 |
| H62 | -1.8706 | 2.7242  | -2.3851 |
| H63 | -2.5233 | 3.8691  | -1.2051 |
| H64 | -1.2971 | -4.5338 | 0.3253  |
| H65 | 0.0393  | -3.8394 | 1.265   |
| H66 | -1.321  | -2.811  | 0.7757  |
| H67 | -6.1906 | -0.5746 | 0.9211  |
| H68 | -6.27   | 1.174   | 0.9739  |
| H69 | 3.0029  | -3.0428 | -3.7304 |
| H70 | 2.9504  | -3.7349 | -2.1071 |
| H71 | 1.4889  | -3.7147 | -3.116  |
| H72 | 0.1786  | 0.2773  | -4.3193 |
| H73 | -0.5002 | -0.119  | -2.72   |

|      |         |         |         |
|------|---------|---------|---------|
| H74  | -1.0704 | 1.2987  | -3.6135 |
| H75  | -3.089  | 0.6011  | -3.1211 |
| H76  | -2.5057 | -1.0599 | -3.3088 |
| H77  | -4.1771 | -0.657  | -3.7126 |
| H78  | -6.386  | 0.0936  | -1.4328 |
| H79  | -5.1888 | 1.3683  | -1.232  |
| H80  | -2.3606 | 2.0603  | 2.2847  |
| H81  | -3.9673 | 2.3259  | 2.9695  |
| H82  | -3.6322 | 2.8018  | 1.2939  |
| H83  | -5.1296 | -2.9599 | -1.7538 |
| H84  | -3.5722 | -3.2191 | -0.9557 |
| H85  | -4.9634 | -2.6845 | -0.0145 |
| H86  | -3.4274 | -1.8553 | 2.5335  |
| H87  | -3.4909 | -0.5985 | 3.7689  |
| H88  | -4.9922 | -1.2434 | 3.0833  |
| H89  | 4.6319  | -0.6188 | 2.4189  |
| H90  | 5.5655  | -2.8771 | 2.6793  |
| H91  | 4.494   | -4.8261 | 1.5782  |
| H92  | 2.4836  | -4.4864 | 0.1531  |
| H93  | 4.9406  | 1.1119  | 1.2686  |
| H94  | 5.8653  | 3.3129  | 0.6779  |
| H95  | 4.4528  | 4.9997  | -0.4844 |
| H96  | 2.1351  | 4.4214  | -1.1329 |
| H97  | 1.4128  | 2.4617  | 2.4222  |
| H98  | -0.3281 | 2.5699  | 4.1671  |
| H99  | -1.6872 | 0.5481  | 4.7123  |
| H100 | -1.2701 | -1.5832 | 3.5351  |
| H101 | 0.7153  | -1.7819 | 2.0941  |

*General Considerations.* All manipulations were carried out using standard Schlenk or glovebox techniques under an atmosphere of dinitrogen. Solvents were degassed and dried by sparging with N<sub>2</sub> gas and passage through an activated alumina column. Deuterated solvents were purchased from Cambridge Isotopes Laboratories, Inc. and were degassed and stored over activated 3 Å molecular sieves prior to use. Reagents were purchased from commercial vendors and used without further purification unless otherwise noted. (<sup>i</sup>PrTPB)FeNNSi<sub>2</sub> (**1**)<sup>2</sup>, <sup>i</sup>PrDPB (**2a**)<sup>3</sup>, and <sup>Ph</sup>DPB (**2b**)<sup>4</sup> were synthesized according to literature procedures. Elemental analyses were performed by Midwest Microlab (Indianapolis, IN) or Robertson Microlit Laboratories (Ledgewood, NJ). Combustion analysis on samples of **6a** and **7** revealed low values for N. Based on NMR, IR, and UV/vis spectroscopic data, we are confident in the purity of these samples. It is possible that these samples partially decomposed and released N<sub>2</sub> during their shipping and/or handling.

*Spectroscopic measurements.* <sup>1</sup>H, <sup>13</sup>C, <sup>31</sup>P, and <sup>11</sup>B NMR spectra were collected at room temperature on a Varian 400 MHz spectrometer. <sup>1</sup>H and <sup>13</sup>C spectra were referenced to residual solvent resonances. <sup>31</sup>P spectra were referenced to external 85% phosphoric acid (δ = 0 ppm). <sup>11</sup>B spectra were referenced to BF<sub>3</sub>•Et<sub>2</sub>O (0 ppm). UV-vis measurements were performed with a Cary 50 instrument with Cary WinUV software. IR measurements were obtained as thin films formed by evaporation or as a solution using a cell with KBr windows using a Bruker Alpha Platinum ATR spectrometer with OPUS software.

*X-ray Crystallography.* X-ray diffraction studies for **3a**, **3b**, **4**, **5**, **6a**, **6b**, and **8** were carried out at the Caltech Division of Chemistry and Chemical Engineering X-ray Crystallography Facility on a Bruker three-circle SMART diffractometer with a SMART 1K CCD detector or APEX CCD detector. Data were collected at 100K using Mo Kα radiation (λ = 0.71073 Å). Structures were solved by direct or Patterson methods using SHELXS and refined against F<sup>2</sup> on all data by full-matrix least squares with SHELXL-97.<sup>5</sup> Data for complex **7** were collected with synchrotron radiation at the Stanford Synchrotron Radiation Laboratory (SSRL) beam line 12-2 at 17 keV using a single phi axis and recorded on a Dectris Pilatus 6M. The images were processed using XDS<sup>6</sup> and further workup of the data was analogous to the other datasets. All non-hydrogen atoms were refined anisotropically. All hydrogen atoms were placed at geometrically calculated positions and refined using a riding model. The isotropic displacement parameters of all hydrogen atoms were fixed at 1.2 (1.5 for methyl groups) times the U<sub>eq</sub> of the atoms to which they are bonded.

**(<sup>i</sup>PrDPB)FeBr (3a)** A solution of <sup>i</sup>PrDPB (**2a**, 1.318 g, 2.778 mmol) and FeBr<sub>2</sub> (0.599 g, 2.778 mmol) in THF (50 ml) was stirred at RT until all of the solids dissolved. The solvent was removed in vacuo and Et<sub>2</sub>O (100ml) was added. The suspension was stirred vigorously to give a bright yellow precipitate. The solvent was removed in vacuo and benzene (100 ml) was added with a freshly-prepared 1% Na/Hg amalgam (Na: 63.9 mg, 2.778 mmol). The reaction was stirred vigorously for 18 hr to give a dark brown mixture. The mixture was decanted from the Hg and solvent was removed in vacuo. Et<sub>2</sub>O (20 ml) was added and subsequently removed in vacuo. The dark solids were then dissolved by adding pentane (200 ml) and Et<sub>2</sub>O (50 ml) and filtered through a pad of Celite. To the brown solids were added pentane (5 ml) and HMDSO (5 ml). The washings were removed and the solids were dried in vacuo. Lyophilization from benzene (10 ml) furnished brown microcrystals (1.423 g, 2.332 mmol, 84%). Single crystals suitable for X-ray diffraction may be obtained by concentration of an Et<sub>2</sub>O solution. <sup>1</sup>H NMR (300 MHz, C<sub>6</sub>D<sub>6</sub>) δ 184.72, 78.42, 39.48, 33.44, 27.94, 25.39, 8.58, 0.91, -1.71, -5.56, -9.89, -11.76, -58.05. UV/vis

(toluene, nm  $\{M^{-1} \text{ cm}^{-1}\}$ ): 461 {1400, sh}, 581 {550}, 715 {250}, 992 {590}.  $\mu_{\text{eff}}$  ( $\text{C}_6\text{D}_6$ , 298 K) = 3.8  $\mu_{\text{B}}$ . Elemental analysis for  $\text{C}_{30}\text{H}_{41}\text{BBrFeP}_2$ : calc. C 59.05, H 6.77; found C 58.97, H 6.98.

### **(<sup>Ph</sup>DPB)FeBr (3b)**

A solution of <sup>Ph</sup>DPB (**2b**, 1.398 g, 2.290 mmol) and  $\text{FeBr}_2$  (0.494 g, 2.29 mmol) in THF (60 ml) was stirred at RT until all of the solids dissolved. The solvent was removed in vacuo and  $\text{Et}_2\text{O}$  (100ml) was added. The suspension was stirred vigorously to give a bright yellow precipitate in a yellow solution. The solvent was removed in vacuo and benzene (60 ml) was added with a freshly-prepared 1% Na/Hg amalgam (Na: 52.7 mg, 2.29 mmol). The reaction was stirred vigorously for 18 hr to give a dark brown mixture. The mixture was decanted from the Hg, filtered through Celite, and dried in vacuo. The solids were washed with  $\text{Et}_2\text{O}$  (3 x 20 ml). The dark, microcrystalline solids were dried in vacuo. Lyophilization from benzene (10 ml) furnished brown microcrystals (1.095 g, 1.467 mmol, 64%). Single crystals suitable for X-ray diffraction may be obtained by diffusion of n-pentane into a concentrated benzene solution.  $^1\text{H}$  NMR (400 MHz,  $\text{C}_6\text{D}_6$ )  $\delta$  82.99, 32.99, 31.22, 22.92, 10.53, 9.41, 5.50, 3.24, 1.83, -0.53, -4.50, -10.18, -72.92. UV/vis (toluene, nm  $\{M^{-1} \text{ cm}^{-1}\}$ ): 474 {1600, sh}, 581 {530}, 717 {260}, 1003 {600}.  $\mu_{\text{eff}}$  ( $\text{C}_6\text{D}_6$ , 298 K) = 3.6  $\mu_{\text{B}}$ . Elemental analysis for  $\text{C}_{42}\text{H}_{33}\text{BBrFeP}_2$ : calc. C 67.60, H 4.46; found C 67.59 H 4.49.

### **[(<sup>iPr</sup>DPB)Fe]N<sub>2</sub> (4)**

A solution of <sup>iPr</sup>DPB (**3a**, 0.942 g, 1.98 mmol) and  $\text{FeBr}_2$  (0.428 g, 1.98 mmol) in THF (40 ml) was stirred at RT until all of the solids dissolved. The solvent was removed in vacuo and  $\text{Et}_2\text{O}$  (80ml) was added. The suspension was stirred vigorously to give a bright yellow precipitate. The solvent was removed in vacuo and benzene (80 ml) was added with a freshly-prepared 1% Na/Hg amalgam (Na: 95.9 mg, 4.17 mmol). The reaction was stirred vigorously for 18 hr to give a dark red-brown mixture. The mixture was decanted from the Hg and filtered through Celite. The solvent was removed in vacuo to give a brown residue. Addition of pentane (5 ml) induced precipitation of dark crystals. The solvent was decanted and the solids were washed with cold  $\text{Et}_2\text{O}$  (3 x 5 ml) and dried in vacuo (0.762 g, 0.700 mmol, 71%). Single crystals suitable for X-ray diffraction may be obtained by concentration of an  $\text{Et}_2\text{O}$  solution. Alternative synthesis of **7**: a 2 ml THF solution of **6a** (53.1 mg, 0.0870 mmol) was stirred over a freshly-prepared 1% Na/Hg (Na: 2.2 mg, 0.095 mmol) for 18 hr. The mixture was decanted from the Hg, concentrated in vacuo, and extracted with 5 ml benzene. The dark benzene solution was filtered through Celite, lyophilized, and recrystallized by concentration of an n-pentane solution to give crystals of **7** (31 mg, 0.028 mmol, 66%).  $^1\text{H}$  NMR (400 MHz,  $\text{C}_6\text{D}_6$ )  $\delta$  171.85, 133.26, 43.95, 34.57, 28.15, 26.17, 7.42, 0.33, -1.50, -2.29, -6.28, -9.12, -76.00. UV/vis (toluene, nm  $\{M^{-1} \text{ cm}^{-1}\}$ ): 405 {15000}, 501 {8300, sh}, 990 {8300}.  $\mu_{\text{eff}}$  ( $\text{C}_6\text{D}_6$ , 298 K) = 4.6  $\mu_{\text{B}}$ . Elemental analysis for  $\text{C}_{60}\text{H}_{82}\text{B}_2\text{Fe}_2\text{N}_2\text{P}_4$ : calc. C 66.20, H 7.59, N 2.57; found C 65.85 H 7.86 N 2.23.

### **(<sup>Ph</sup>DPB)Fe (5)**

A 3 ml THF solution of **3b** (77.9 mg, 0.1044 mmol) was stirred over freshly-prepared 1% Na/Hg amalgam (Na: 2.5 mg, 0.11 mmol) for 10 hr. The red-brown solution was decanted from the Hg and solvent was removed in vacuo. The solids were extracted into benzene (5 ml) and filtered through Celite. The solvent was removed in vacuo. The solids were washed with  $\text{Et}_2\text{O}$  (2 x 2 ml) and dissolved in benzene (2 ml). Layering the solution with pentane furnished brown single crystals of the title compound (78.0 mg, 0.0948 mmol, 90.8% for **5**•2 $\text{C}_6\text{H}_6$ ). XRD studies



revealed that the compound crystallizes with two molecules of  $C_6H_6$ . The compound exhibits a degree of paramagnetic speciation in  $C_6D_6$  under  $N_2$  or Ar but is fully diamagnetic in THF- $d_8$ ; as such,  $^1H$  NMR data are reported in both solvents.  $^1H$  NMR (400 MHz,  $C_6D_6$ )  $\delta$  8.80 (d,  $J = 7.2$  Hz, 2H), 7.64 (s, 4H), 7.37 (t,  $J = 6.8$  Hz, 2H), 7.16 (s, 4H), 7.06 - 6.83 (m, 12H), 6.48 (t,  $J = 7.0$  Hz, 4H), 6.29 (t,  $J = 6.2$  Hz, 1H), 3.63 (br s, 2H), 3.23 (br s, 2H).  $^1H$  NMR (400 MHz, THF- $d_8$ )  $\delta$  8.58 (d,  $J = 7.5$  Hz, 2H), 7.56 (m, 4H), 7.41 (t,  $J = 7.5$  Hz, 2H), 7.25 (d,  $J = 7.0$  Hz, 6H), 7.07 (m, 6H), 6.97 - 6.82 (m, 2H), 6.73 (t,  $J = 7.4$  Hz, 2H), 6.57 (m, 4H), 3.32 - 3.17 (br s, 2H), 3.07 (br s, 2H).  $^{13}C$  NMR (101 MHz,  $C_6D_6$ )  $\delta$  161.76, 146.25-145.37 (m), 143.47 (t,  $J = 13.8$  Hz), 134.07 (t,  $J = 15.8$  Hz), 132.61, 131.42, 130.93, 128.26, 127.12, 126.97, 124.44, 106.77, 99.41, 86.36, 78.73.  $^{11}B$  NMR (128 MHz,  $C_6D_6$ )  $\delta$  36.44.  $^{31}P$  NMR (162 MHz,  $C_6D_6$ )  $\delta$  77.51. Elemental analysis for  $C_{42}H_{33}BF_2P_2 \cdot 0.5C_6H_6$ : calc. C 76.62, H 5.14, N 0; found C 76.55, H 5.60, N <0.02.

### **( $^{iPr}$ DPB)FeNNSi<sub>2</sub> (6a)**

A mixture of **3a** (0.233 g, 0.381 mmol), 1,2-bis(chlorodimethylsilyl)ethane (0.0905 g, 0.420 mmol), and freshly-prepared 1% Na/Hg (Na: 0.0272 g, 1.18 mmol) was rapidly stirred in 5 ml THF under 1 atm  $N_2$ . The solution turned deep green within 15 min. and was decanted from the Hg. Solvent was removed in vacuo, benzene (3 ml) was added to the solids, and the solution was filtered through Celite. Solvent was removed in vacuo to give green solids which were dissolved in 5 ml pentane. Upon stand for 10 min., dark green crystals formed. The remaining solution was again filtered and allowed to evaporate into HMDSO thereby furnishing more dark green crystals. The combined crystals were washed with pentane (3 x 0.5 ml) and lyophilized from benzene to give the title compound (0.202 mg, 0.287 mmol, 75.5%).  $^1H$  NMR (400 MHz,  $C_6D_6$ )  $\delta$  8.56 (d,  $J = 7.4$  Hz, 2H), 7.52 (td,  $J = 7.3, 1.2$  Hz, 2H), 7.44 (d,  $J = 7.6$  Hz, 2H), 6.97 (td,  $J = 7.3, 1.2$  Hz, 2H), 6.49 (t,  $J = 7.2$  Hz, 1H), 5.11 (d,  $J = 6.5$  Hz, 2H), 4.75 (t,  $J = 6.9$  Hz, 2H), 2.31 (m, 2H), 1.54 (m, 2H), 1.19 - 1.06 (m, 6H), 1.06 - 0.94 (m, 6H), 0.81 (s, 4H), 0.73 - 0.55 (m, 12H), 0.27 (s, 12H).  $^{13}C$  NMR (101 MHz,  $C_6D_6$ )  $\delta$  176.07, 140.35, 140.21, 137.17, 133.00, 130.09, 126.34, 124.92, 122.67, 113.68, 29.82, 21.14, 19.25, 18.54, 18.46, 15.15, 10.28, -5.53.  $^{31}P$  NMR (162 MHz,  $C_6D_6$ )  $\delta$  29.43.  $^{11}B$  NMR (128 MHz,  $C_6D_6$ )  $\delta$  -28.16. UV/vis (toluene, nm  $\{M^{-1} cm^{-1}\}$ ): 651 {1100}, 988 {1600}. Elemental analysis for  $C_{36}H_{57}BF_2N_2P_2Si_2$ : calc. C 61.54, H 8.18, N 3.99; found C 61.82, H 7.93, N 3.35.

### **( $^{Ph}$ DPB)FeNNSi<sub>2</sub> (6b)**

A mixture of **3b** (0.195 g, 0.262 mmol), 1,2-bis(chlorodimethylsilyl)ethane (0.0621 g, 0.288 mmol), and freshly-prepared 1% Na/Hg (Na: 0.0187 g, 0.813 mmol) was rapidly stirred in 5 ml THF under 1 atm  $N_2$ . The solution turned deep green within 90 min. and was decanted from the Hg. Solvent was removed in vacuo, benzene (5 ml) was added to the solids, and the solution was filtered through Celite after standing at RT for 2 hr. Solvent was removed in vacuo to give green solids which were washed with pentane (3 x 1 ml) and redissolved in a minimal amount of benzene. The solution was again filtered and layer with pentane to provide dichroic green/brown crystals. The crystals were washed with pentane (3 x 0.5 ml) to give the title compound (0.188 g, 0.2242 mmol, 85.6%).  $^1H$  NMR (400 MHz,  $C_6D_6$ )  $\delta$  8.08 (m, 4H), 7.95 (m, 2H), 7.36 - 6.90 (m, 15H), 6.75 (m, 8H), 6.53 (m, 4H), 0.34 (s, 4H), -0.22 (s, 12H).  $^{13}C$  NMR (101 MHz,  $C_6D_6$ )  $\delta$  159.64, 143.47 - 142.65 (m), 139.85 (t,  $J = 15.3$  Hz), 139.28 - 138.72 (m), 134.58, 132.15, 130.32, 130.10, 128.57, 126.33, 125.81, 115.89, 97.93, 7.93, -1.82.  $^{31}P$  NMR (162 MHz,  $C_6D_6$ )  $\delta$  88.02.  $^{11}B$  NMR (128 MHz,  $C_6D_6$ )  $\delta$  32.67. UV/vis (toluene, nm  $\{M^{-1} cm^{-1}\}$ ): 653

{850}. Elemental analysis for  $C_{48}H_{49}BFeN_2P_2Si_2$ : calc. C 68.74, H 5.89, N 3.34; found C 68.48, H 5.67, N 3.07.

### $(^{iPr}DPB-H)FeNSiNSi_2$ (**7**)

A solution of **6a** (82.5 mg, 0.117 mmol) and  $PhSiH_3$  (14.0 mg, 0.129 mmol) was allowed to stand in 2 ml benzene until the solution turned from green to deep orange (1 hr.). The benzene was lyophilized and the solids were extracted into TMS (5 ml) and filtered through Celite. Small orange crystals of the product formed upon concentration of the solution into HMDSO (41.0 mg, 0.0506 mmol, 43.2%). The reaction is quantitative by NMR, though the isolated yield of solids suffers due to the high solubility of the product.  $^1H$  NMR (400 MHz,  $C_6D_6$ )  $\delta$  113.98, 52.22, 32.54, 25.37, 24.56, 18.16, 17.55, 12.78, 11.51, -1.09, -9.62, -10.32, -18.45, -25.52, -29.85, -33.94. IR (thin film from  $C_6D_6$ ,  $cm^{-1}$ ): 2090 (s, Si-H), 2000 (s and br, B-H-Fe).  $\mu_{eff}$  ( $C_6D_6$ , 298 K) = 5.0  $\mu_B$ . Elemental analysis for  $C_{42}H_{65}BFeN_2P_2Si_3$ : calc. C 62.21, H 8.08, N 3.45; found C 61.92 H 7.81 N 1.95.

#### *Synthesis of 7 from 3a*

A 2 ml THF solution of **3a** (48.8 mg, 0.0800 mmol), 1,2-bis-(chlorodimethylsilyl)ethane (19.0 mg, 0.0881 mmol) and 1% Na/Hg (5.7 mg Na, 0.25 mmol) was vigorously stirred for 5 min. to give a green solution which was then added to neat  $PhSiH_3$  (9.5 mg, 0.088 mmol). The solution deep orange within 10 min. The volatiles were removed in vacuo and the solids were dissolved in pentane and filtered through a plug of Celite. The volatiles were removed in vacuo to give an orange foam (57.7 mg) that was identified as **8** (>95% purity by  $^1H$  NMR).

#### *Synthesis of 7 from 4*

A 2 ml THF solution of **4** (20.8 mg, 0.0191 mmol), 1,2-bis-(chlorodimethylsilyl)ethane (8.6 mg, 0.040 mmol) and 1% Na/Hg (1.8 mg Na, 0.078 mmol) was vigorously stirred for 5 min. to give a green solution which was then added to neat  $PhSiH_3$  (4.3 mg, 0.040 mmol). The solution turned deep orange within 10 min. The volatiles were removed in vacuo and the solids were dissolved in pentane and filtered through a plug of Celite. The volatiles were removed in vacuo to give an orange foam (25.1 mg) that was identified as **8** (>95% purity by  $^1H$  NMR).

### $(^{Ph}DPB-H)^*FeNHSiNSi$ (**8**)

A solution of **6b** (45.0 mg, 0.0537 mmol) in benzene (5 ml) was stirred under 1 atm  $H_2$  at 50 °C for three hours. The solution changed from dark green to light brown. Solvent was removed in vacuo to give a tan solid. The solids were washed with pentane (2 x 5 ml) and dissolved in minimal  $Et_2O$  (~10 ml). The solution was allowed to evaporate into HMDSO to give white solids (28.7 mg, 0.0341 mmol, 63.6%). Single crystals suitable for XRD were grown by vapor diffusion of n-pentane into a concentrated THF solution.  $^1H$  NMR (400 MHz,  $C_6D_6$ )  $\delta$  188.54, 26.16, 25.70, 20.47, 16.37, 14.59, 12.01, 5.79, 4.77, 3.85, 3.23, 2.25, 1.97, 1.21, 0.84, 0.25, -0.04, -1.89, -7.20, -9.74. IR (thin film from  $C_6D_6$ ,  $cm^{-1}$ ): 3343 (w, N-H), ~2100 (s and br, B-H-Fe).  $\mu_{eff}$  ( $C_6D_6$ , 298 K) = 4.8  $\mu_B$ . Satisfactory combustion analysis data were not obtained for **11**, though we are confident in our assignment of the product based on NMR and IR spectra of bulk samples as well as XRD analysis of single crystalline samples. ( $^{Ph}DPB-D$ ) $^*FeNDSiNSi$  (**11-D<sub>2</sub>**). The D-labeled compound was generated in a procedure that is identical to that for **11** using  $D_2$  instead of  $H_2$ .  $^1H$  NMR data are the same between **11** and **11-D<sub>2</sub>**. IR (thin film from  $C_6D_6$ ,  $cm^{-1}$ ): 2476 (w, N-D), ~1550 (s and br, B-D-Fe).

*Attempted reaction of 1 with H<sub>2</sub>*

To a J. Young tube was added a C<sub>6</sub>D<sub>6</sub> solution of **1**. The green solution as subjected to three freeze-pump-thaw cycles and 1 atm H<sub>2</sub> was added. No reaction occurred at RT after 15 min. by <sup>1</sup>H NMR analysis. After heating the solution to 50 °C for 2 hr., the <sup>1</sup>H NMR spectrum showed a mixture of **1**, the previously-characterized (TPB)Fe(N<sub>2</sub>) complex,<sup>7</sup> and other unidentified diamagnetic and paramagnetic species.

*Attempted reaction of 1 with PhSiH<sub>3</sub>*

To a J. Young tube was added a C<sub>6</sub>D<sub>6</sub> solution of **1** (9.5 mg, 0.0116 mmol) with PhSiH<sub>3</sub> (1.4 mg, 0.013 mmol). No reaction occurred at RT after 15 min. by <sup>1</sup>H NMR analysis. After heating the solution to 50 °C for 6 hr., the <sup>1</sup>H NMR spectrum showed mostly **1** and small amounts of unidentified diamagnetic and paramagnetic species.

## NMR spectra

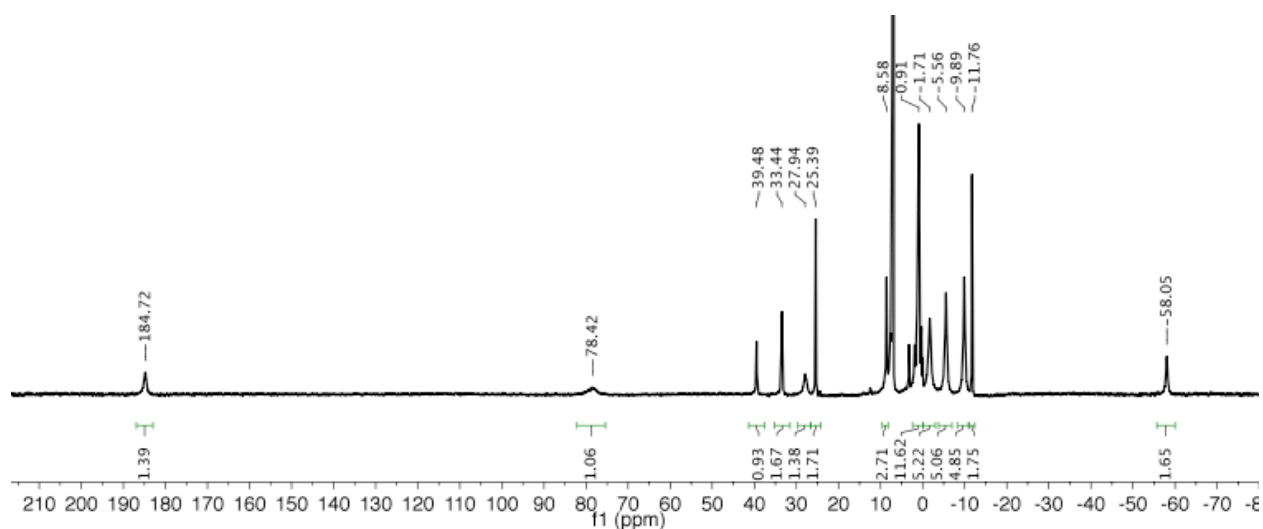

**Figure S1.**  $^1\text{H}$  NMR spectrum of  $(i\text{PrDPB})\text{FeBr}$  in  $\text{C}_6\text{D}_6$  (**3a**)

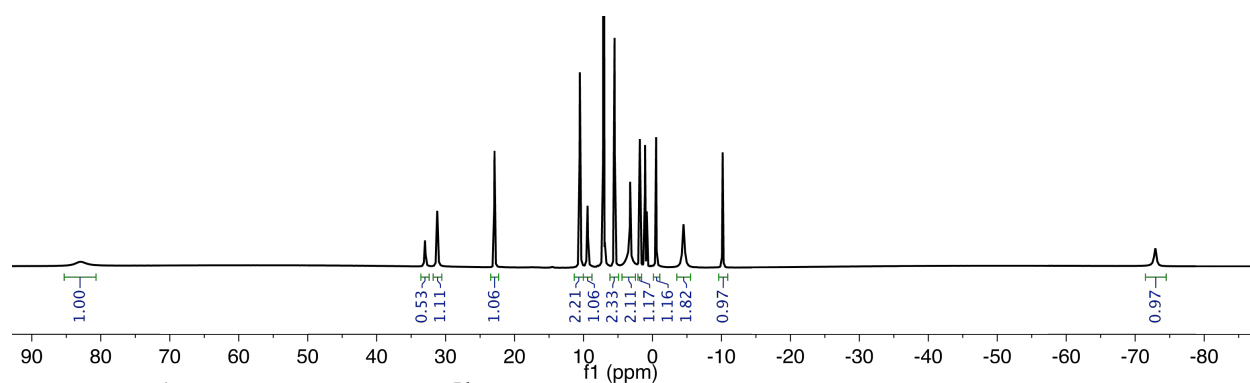

**Figure S2.**  $^1\text{H}$  NMR spectrum of  $(\text{PhDPB})\text{FeBr}$  in  $\text{C}_6\text{D}_6$  (**3b**)

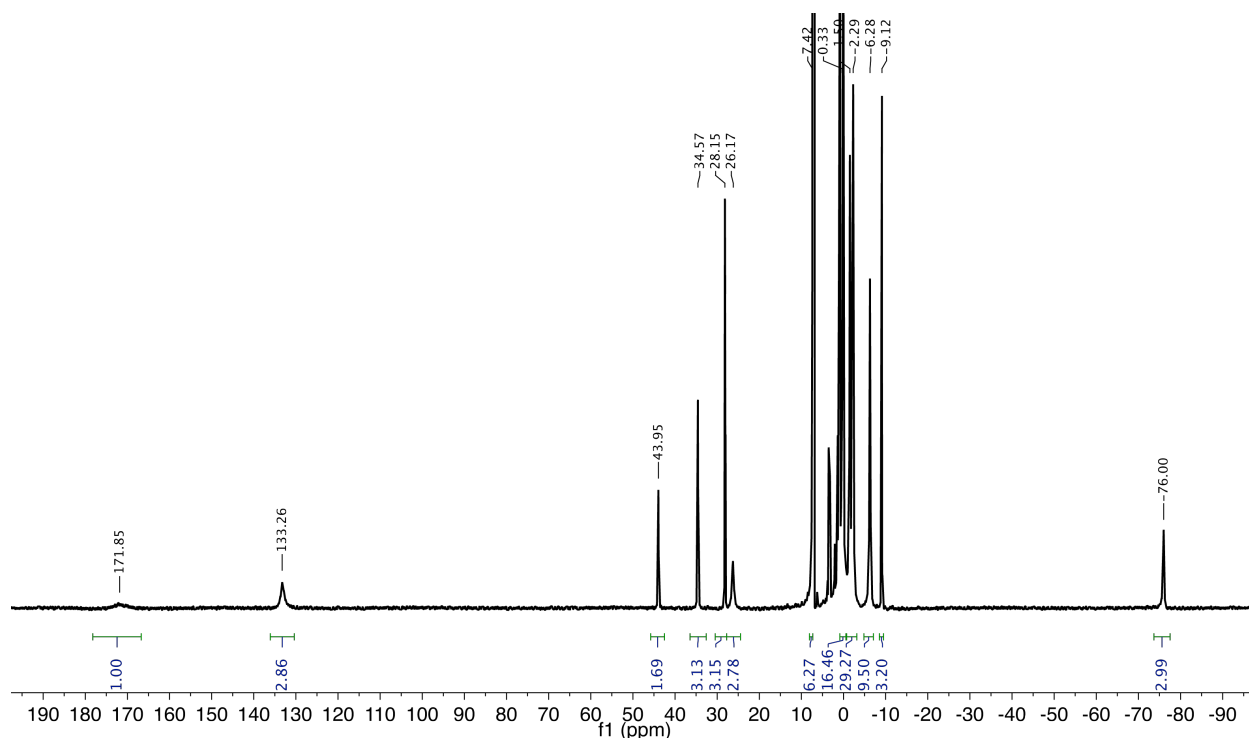

Figure S3.  $^1\text{H}$  NMR spectrum of  $[(i\text{PrDPB})\text{Fe}]_2(\mu\text{-}1,2\text{-N}_2)$  in  $\text{C}_6\text{D}_6$  (**4**)

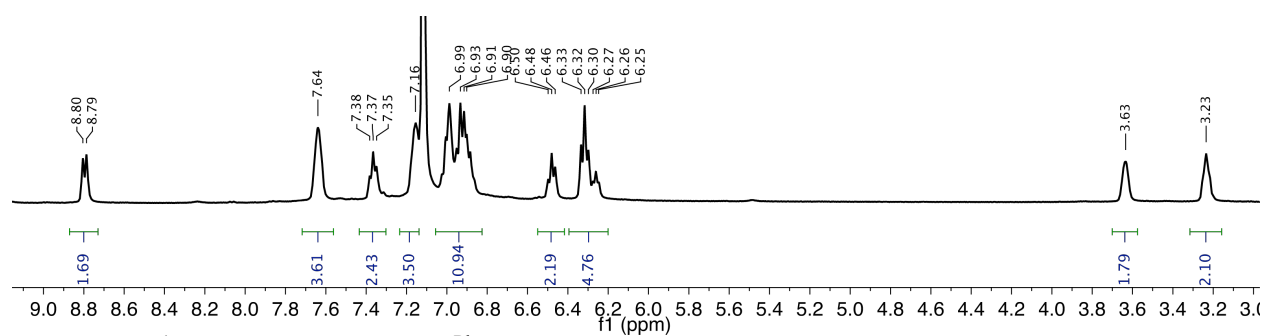

Figure S4.  $^1\text{H}$  NMR spectrum of  $(\text{PhDPB})\text{Fe}$  in  $\text{C}_6\text{D}_6$  (**5**)

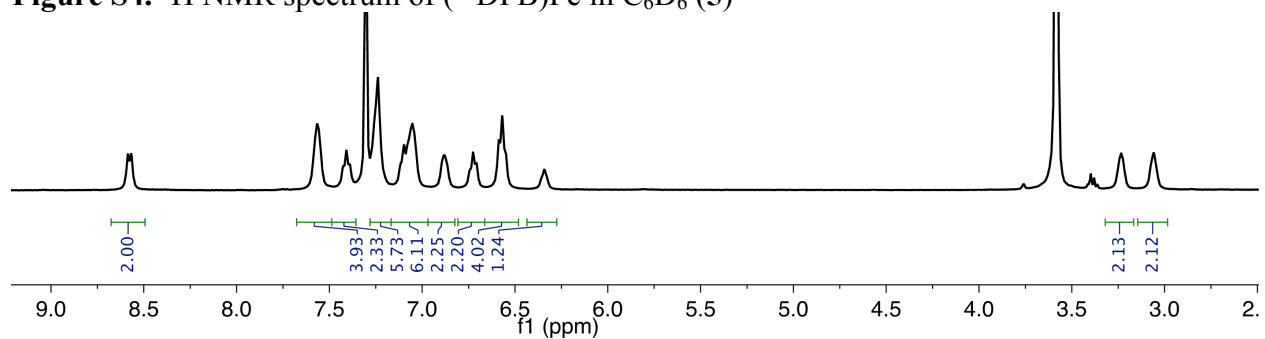

Figure S5.  $^1\text{H}$  NMR spectrum of  $(\text{PhDPB})\text{Fe}$  in  $d_8\text{-THF}$  (**5**)

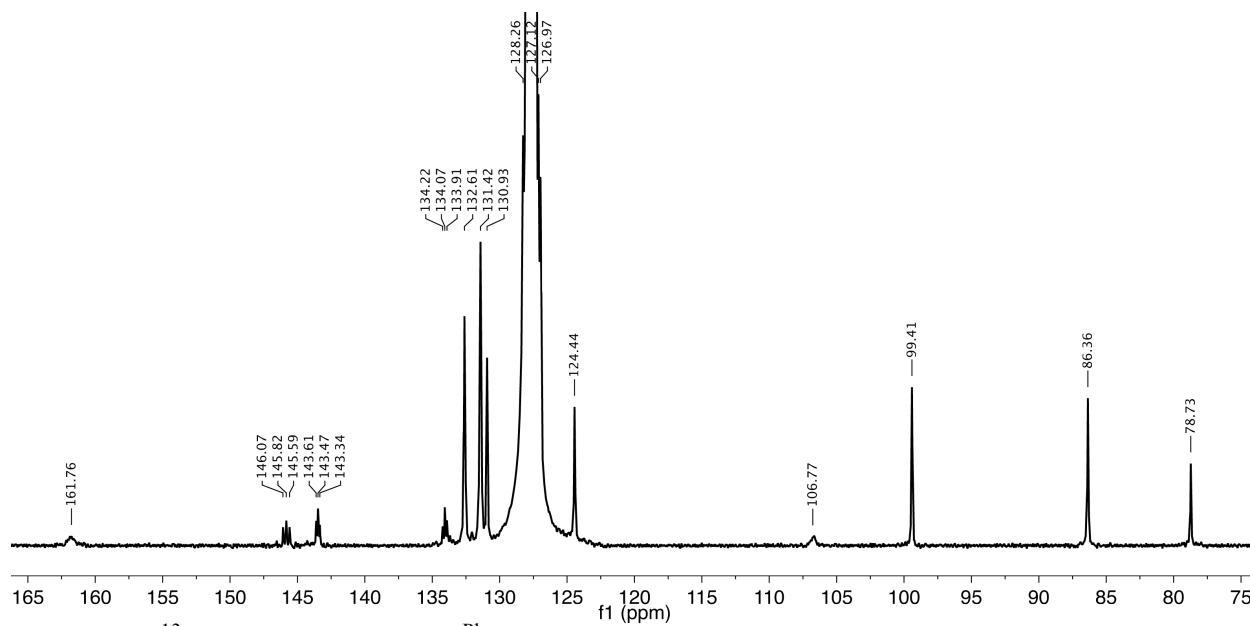

**Figure S6.**  $^{13}\text{C}$  NMR spectrum of  $(^{\text{Ph}}\text{DPB})\text{Fe}$  in  $\text{C}_6\text{D}_6$  (**5**)

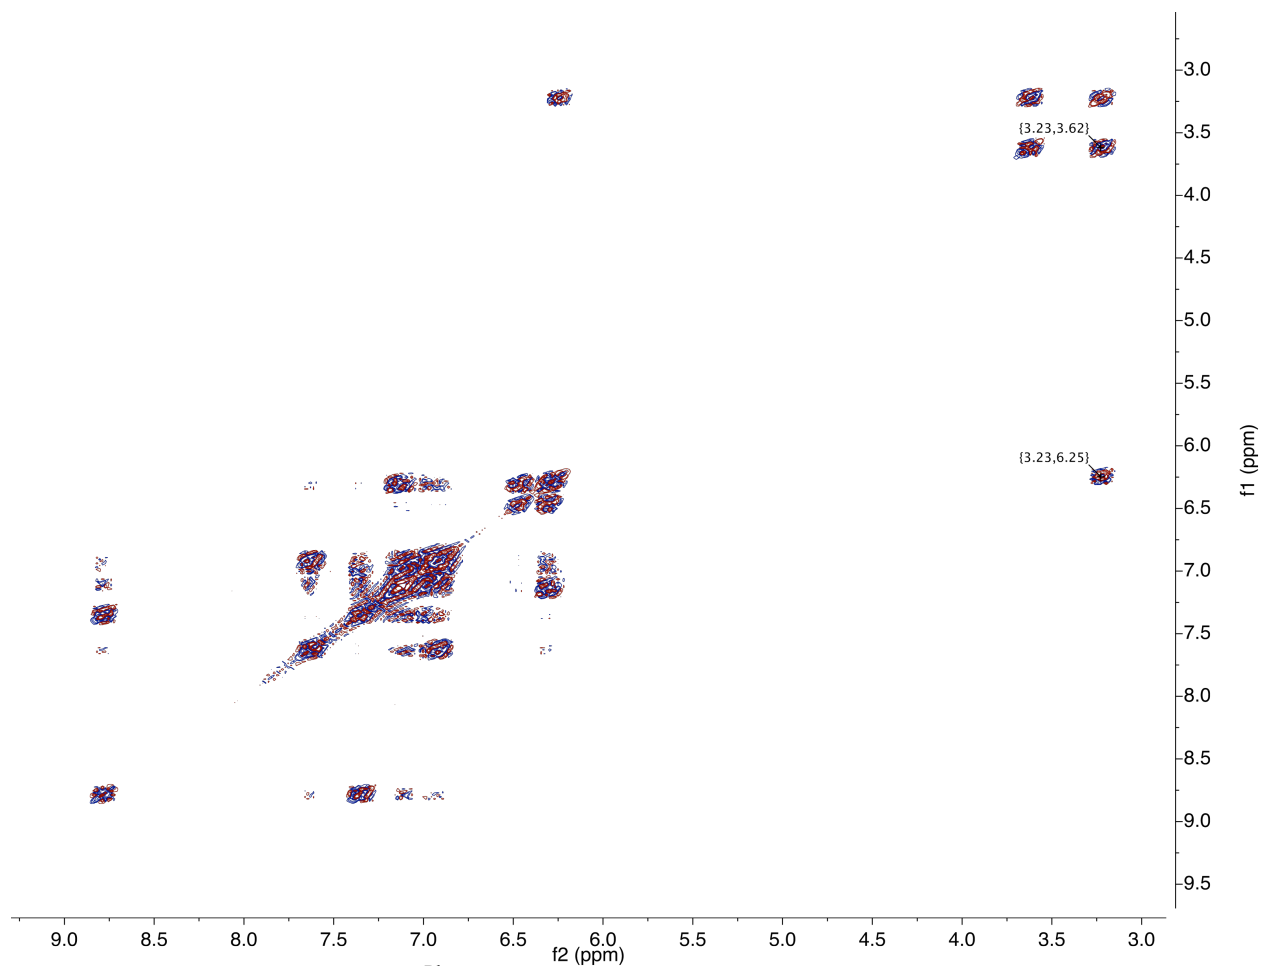

**Figure S7.** COSY spectrum of  $(^{\text{Ph}}\text{DPB})\text{Fe}$  in  $\text{C}_6\text{D}_6$  (**5**)

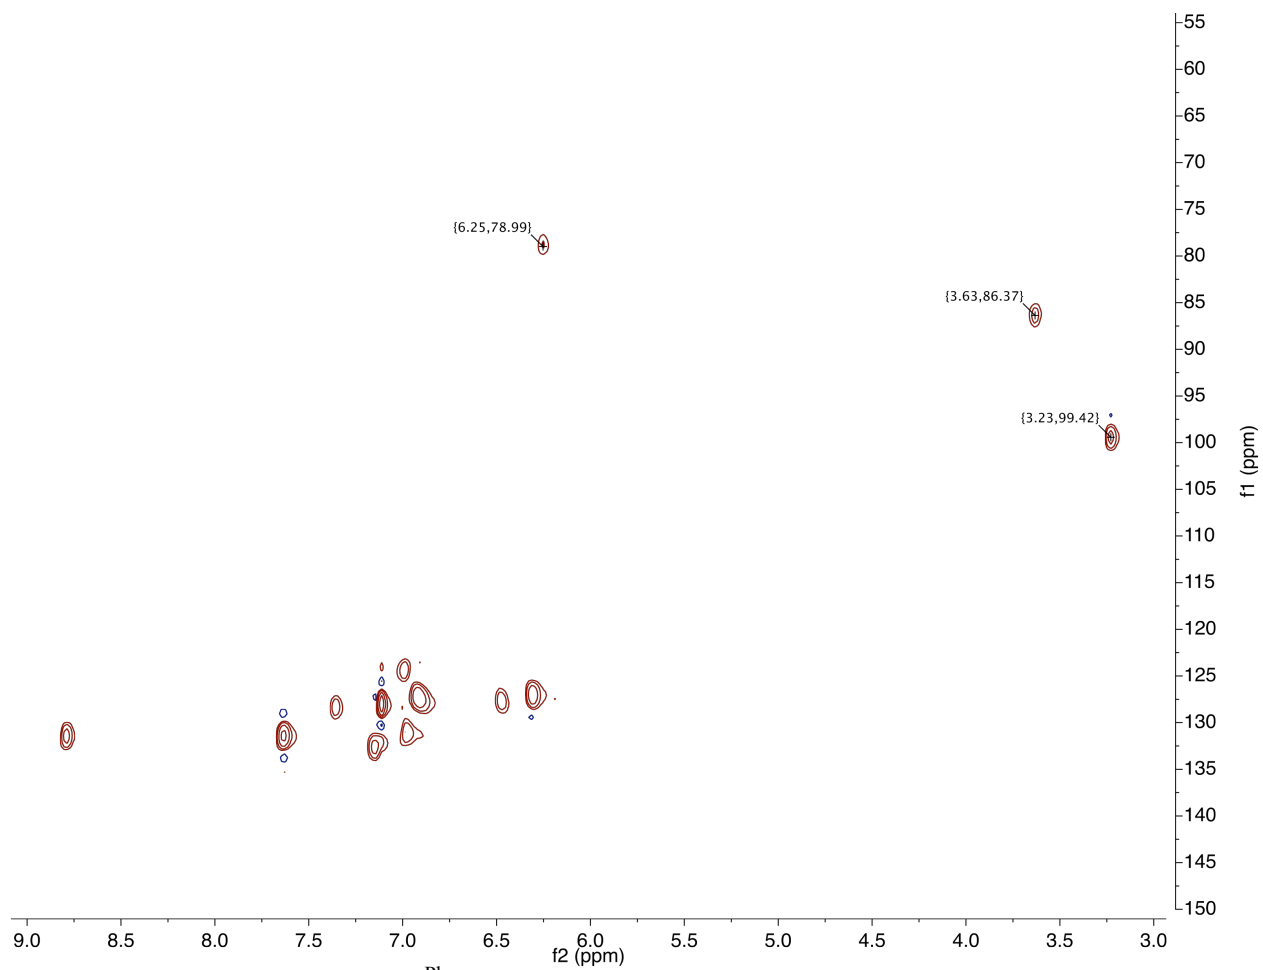

**Figure S8.** HSQC spectrum of  $(\text{PhDPB})\text{Fe}$  in  $\text{C}_6\text{D}_6$  (**5**)

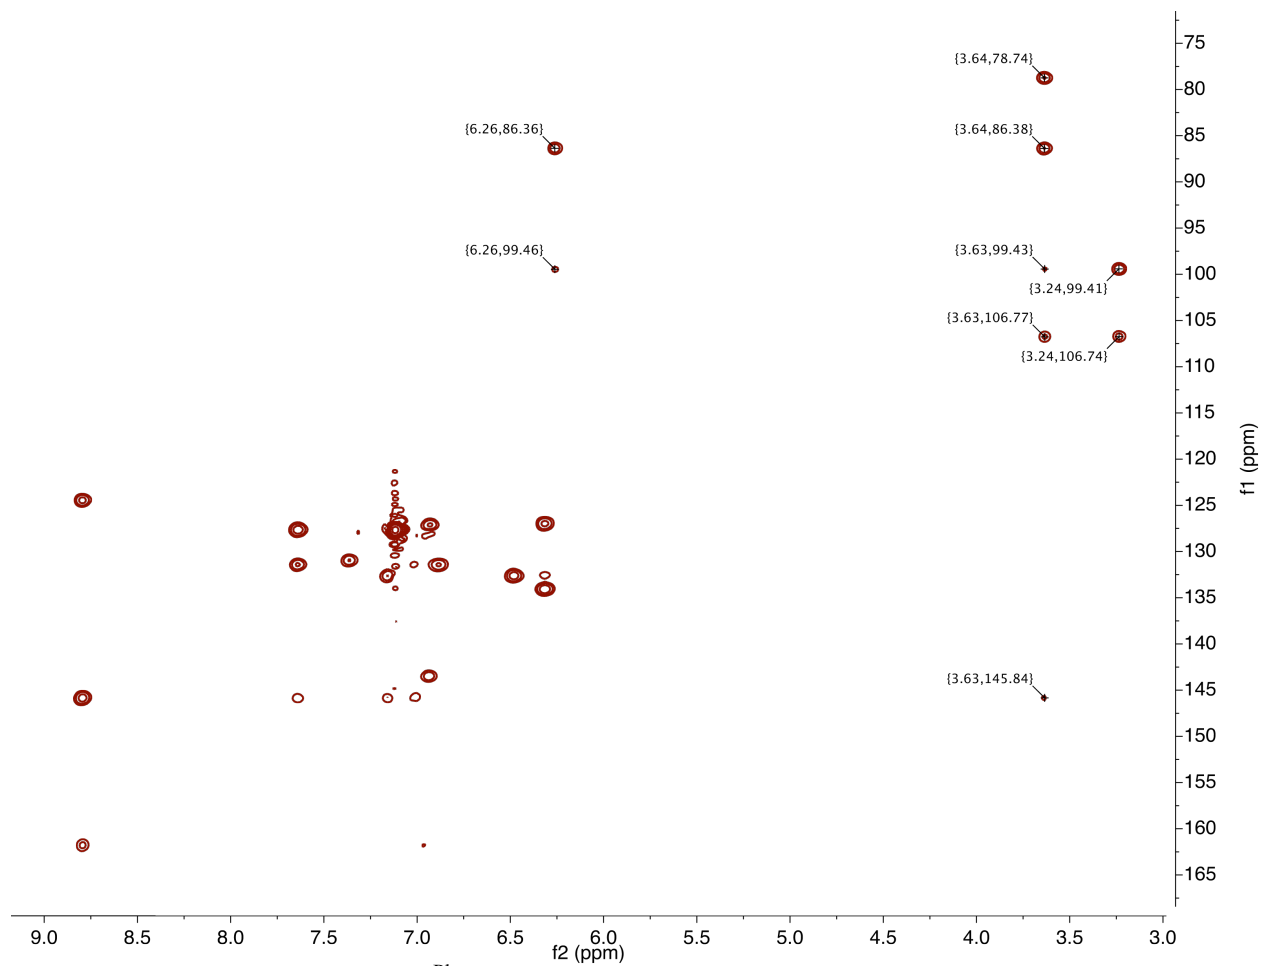

Figure S9. HMBC spectrum of  $(\text{PhDPB})\text{Fe}$  in  $\text{C}_6\text{D}_6$  (**5**)

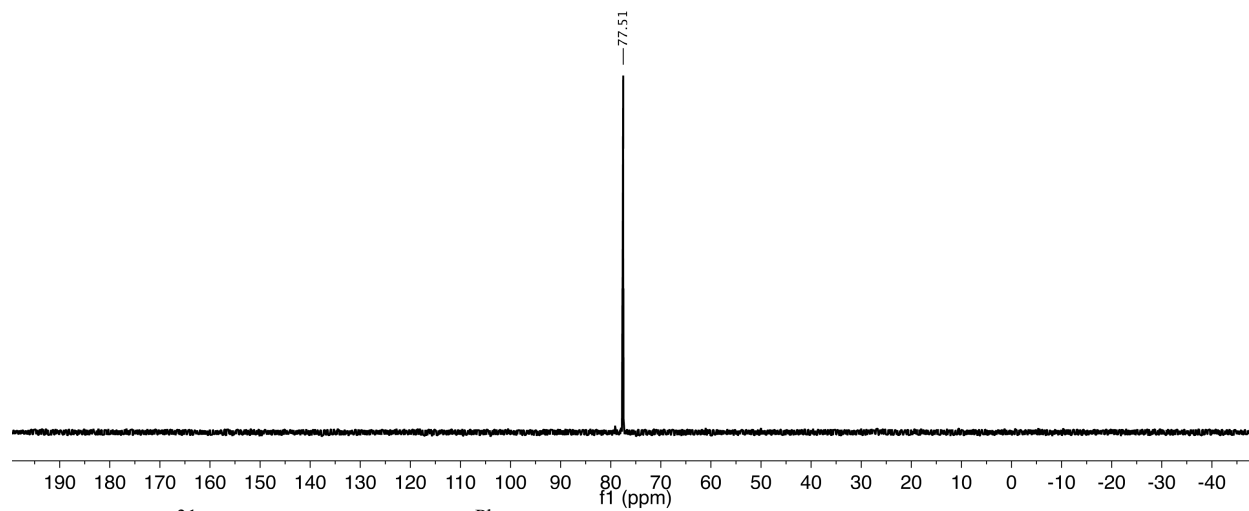

Figure S10.  $^{31}\text{P}$  NMR spectrum of  $(\text{PhDPB})\text{Fe}$  in  $\text{C}_6\text{D}_6$  (**5**)



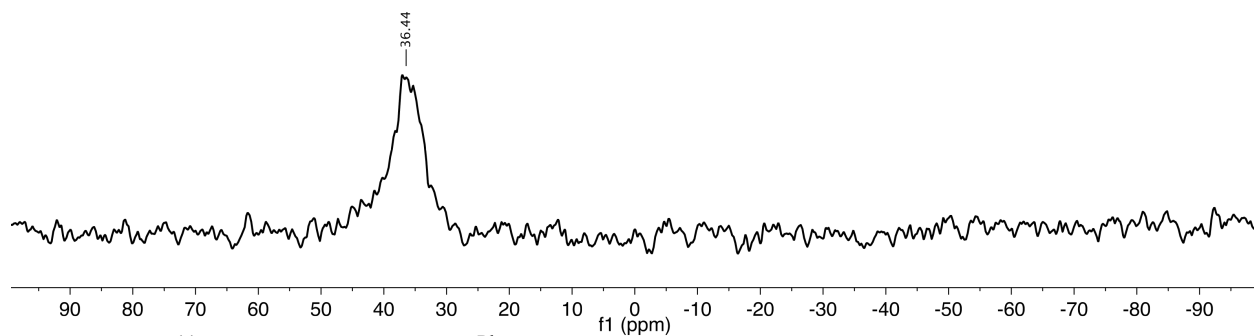

**Figure S11.**  $^{11}\text{B}$  NMR spectrum of  $(^{\text{Ph}}\text{DPB})\text{Fe}$  in  $\text{C}_6\text{D}_6$  (**5**)

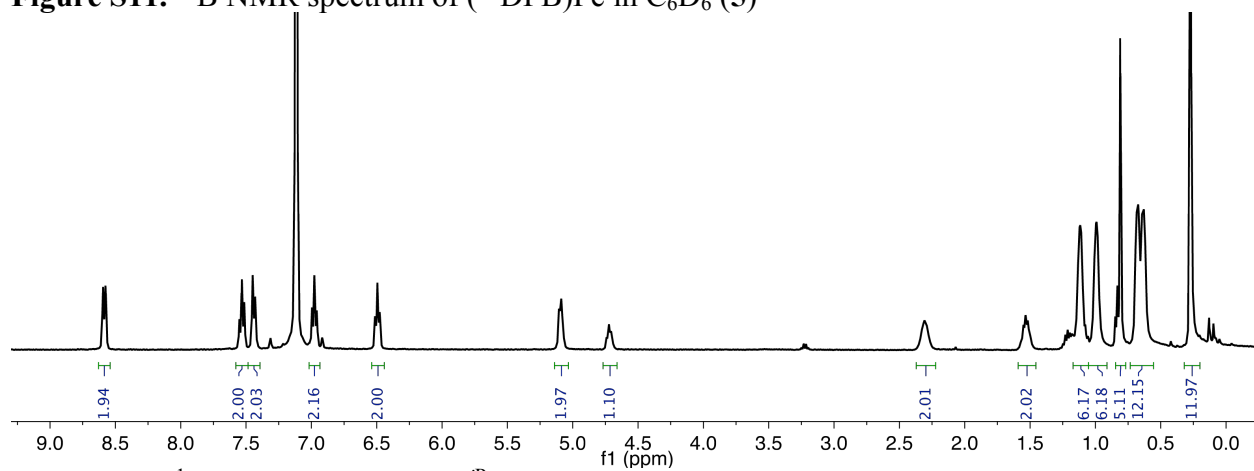

**Figure S12.**  $^1\text{H}$  NMR spectrum of  $(^{\text{iPr}}\text{DPB})\text{Fe}(\text{NNSi}_2)$  in  $\text{C}_6\text{D}_6$  (**6a**)

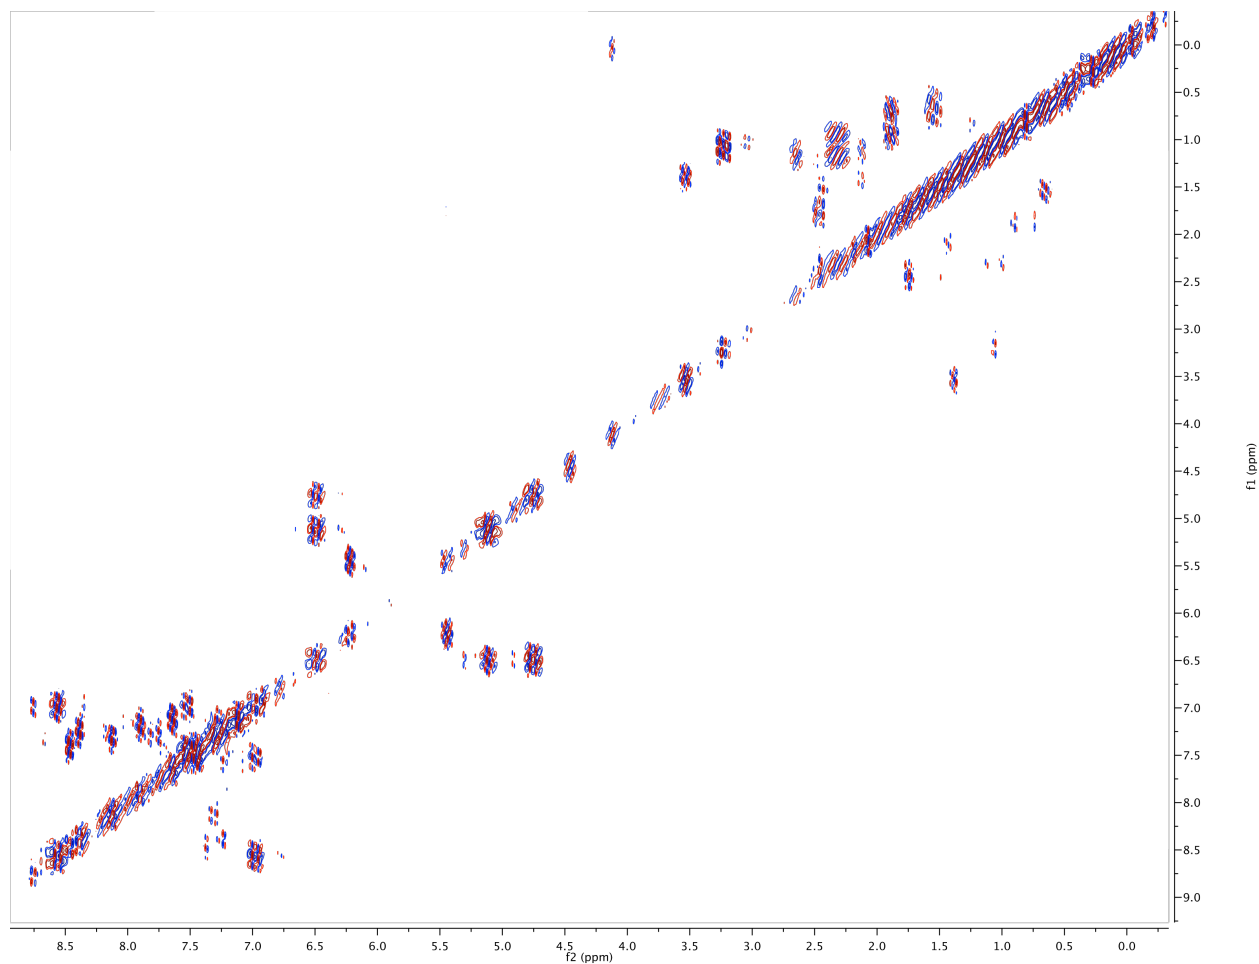

**Figure S13.**  $^1\text{H}$ - $^1\text{H}$  COSY spectrum of  $(i\text{Pr})\text{DPB})\text{Fe}(\text{NNSi}_2)$  in  $\text{C}_6\text{D}_6$  (**6a**)

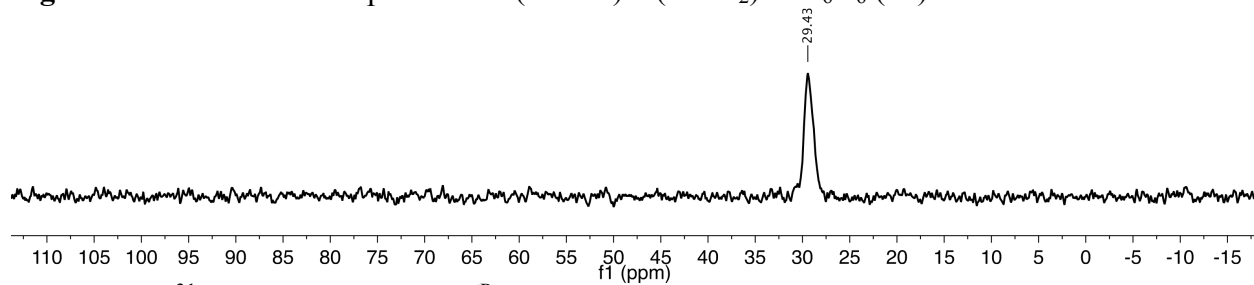

**Figure S14.**  $^{31}\text{P}$  NMR spectrum of  $(i\text{Pr})\text{DPB})\text{Fe}(\text{NNSi}_2)$  in  $\text{C}_6\text{D}_6$  (**6a**)

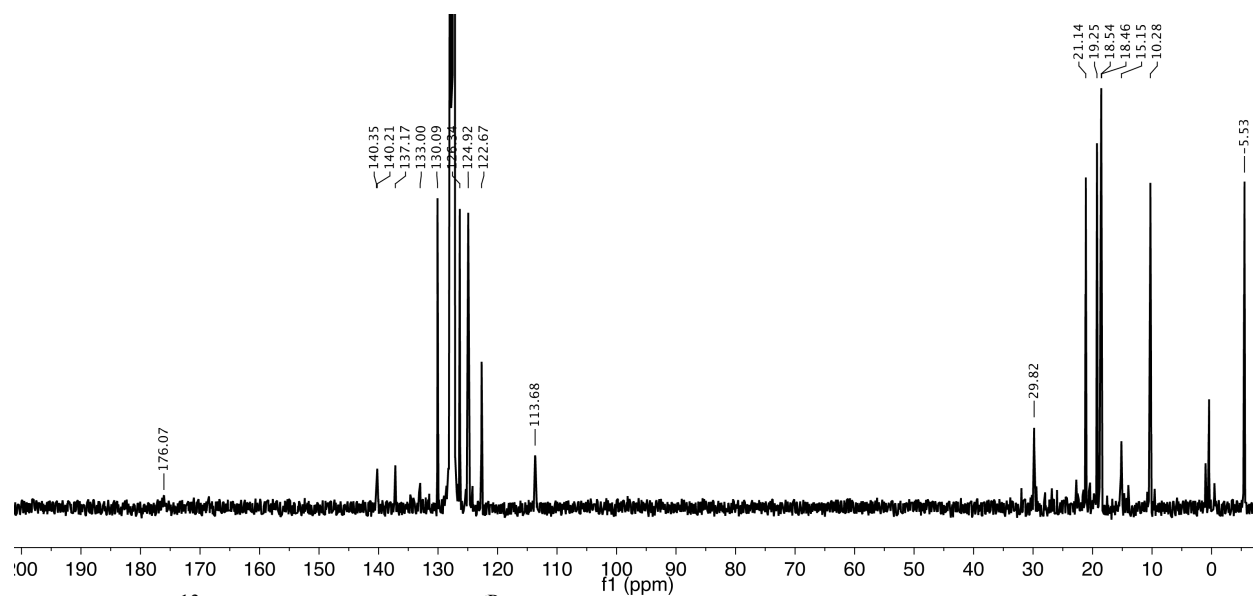

**Figure S15.**  $^{13}\text{C}$  NMR spectrum of  $(i\text{PrDPB})\text{Fe}(\text{NNSi}_2)$  in  $\text{C}_6\text{D}_6$  (**6a**)

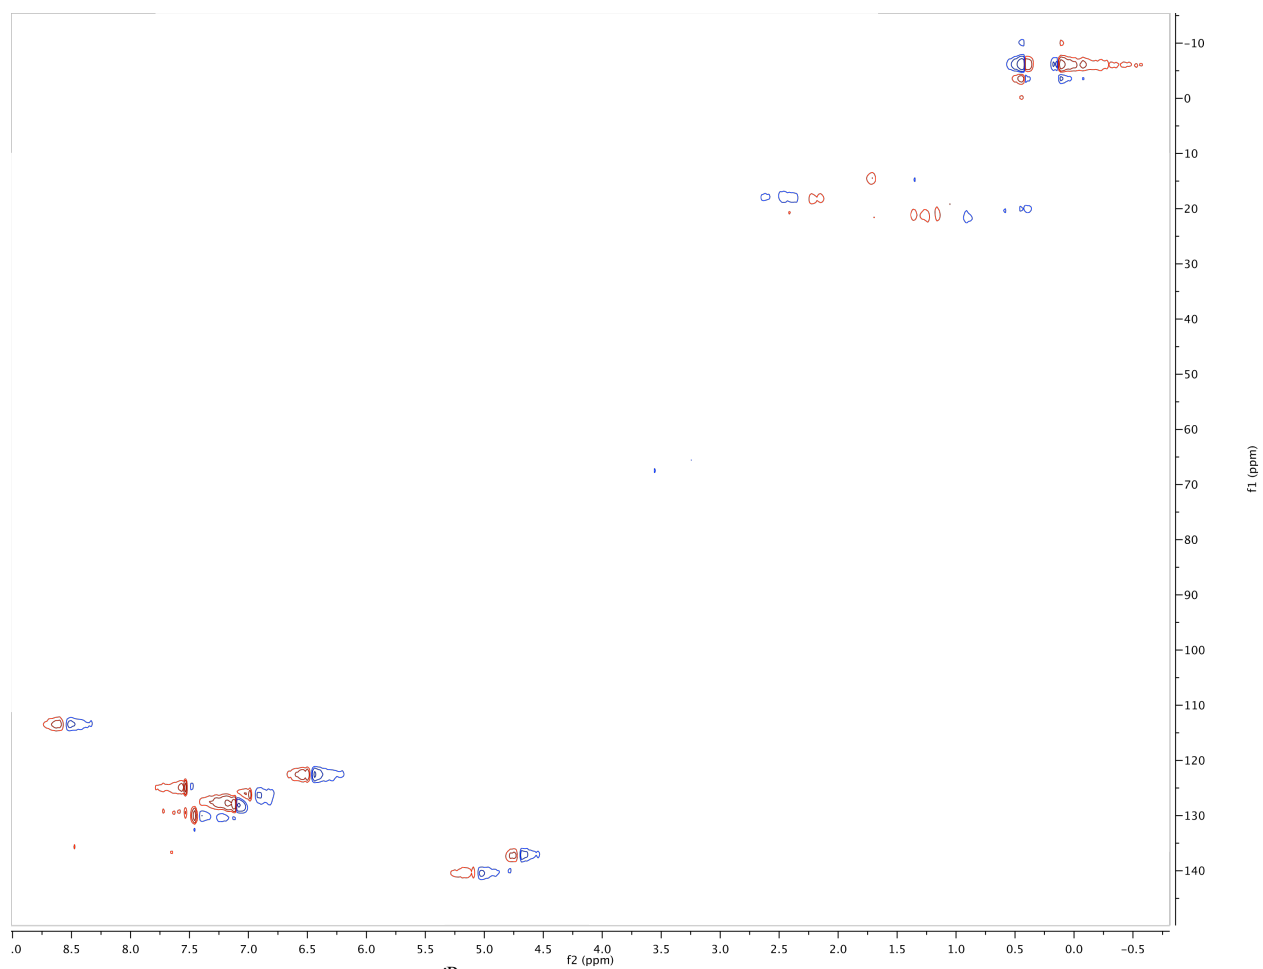

**Figure S16.** HSQC spectrum of  $(i\text{PrDPB})\text{Fe}(\text{NNSi}_2)$  in  $\text{C}_6\text{D}_6$  (**6a**)

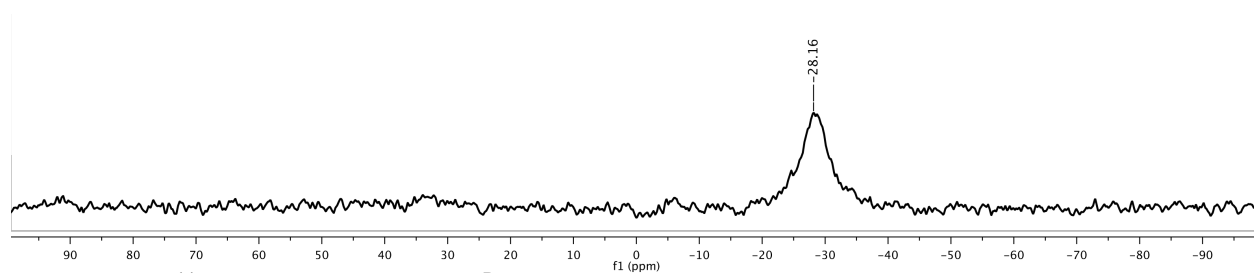

**Figure S17.**  $^{11}\text{B}$  NMR spectrum of  $(i\text{PrDPB})\text{Fe}(\text{NNSi}_2)$  in  $\text{C}_6\text{D}_6$  (**6a**)

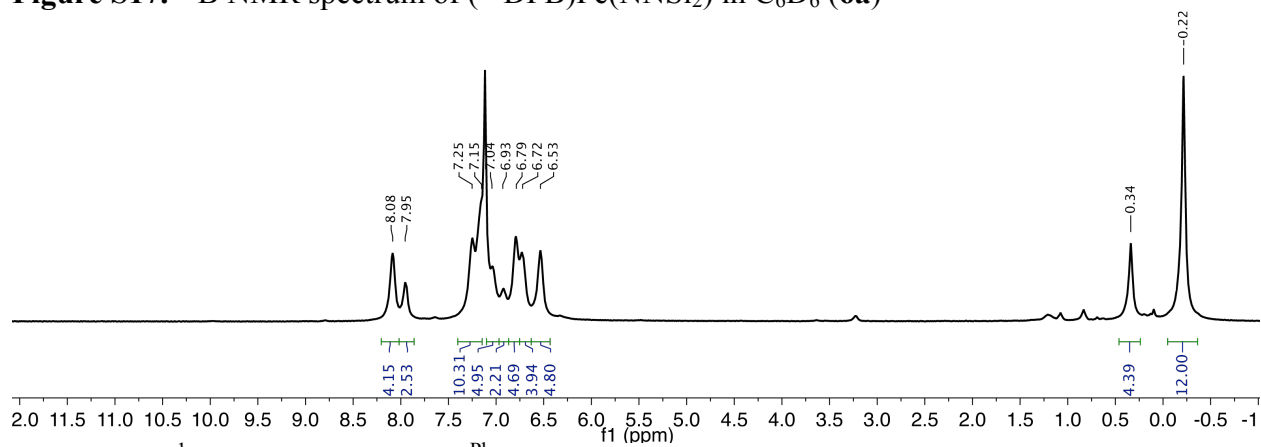

**Figure S18.**  $^1\text{H}$  NMR spectrum of  $(\text{PhDPB})\text{Fe}(\text{NNSi}_2)$  in  $\text{C}_6\text{D}_6$  (**6b**)

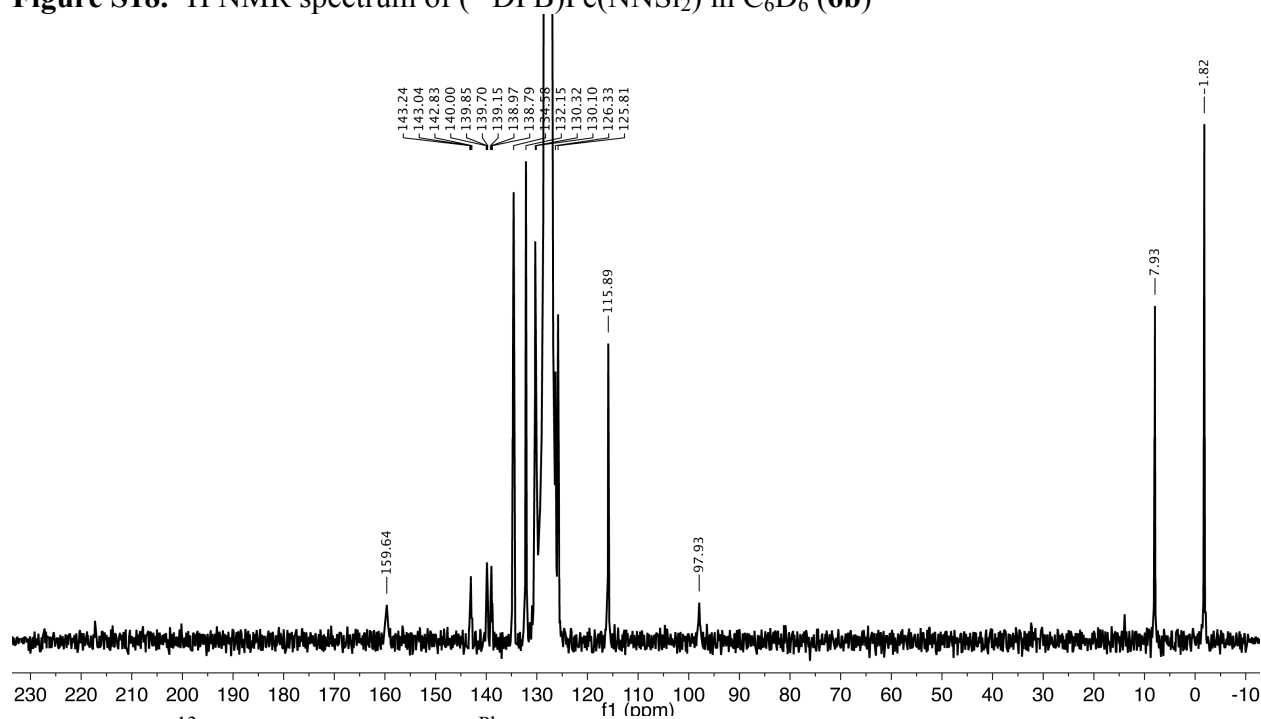

**Figure S19.**  $^{13}\text{C}$  NMR spectrum of  $(\text{PhDPB})\text{Fe}(\text{NNSi}_2)$  in  $\text{C}_6\text{D}_6$  (**6b**)

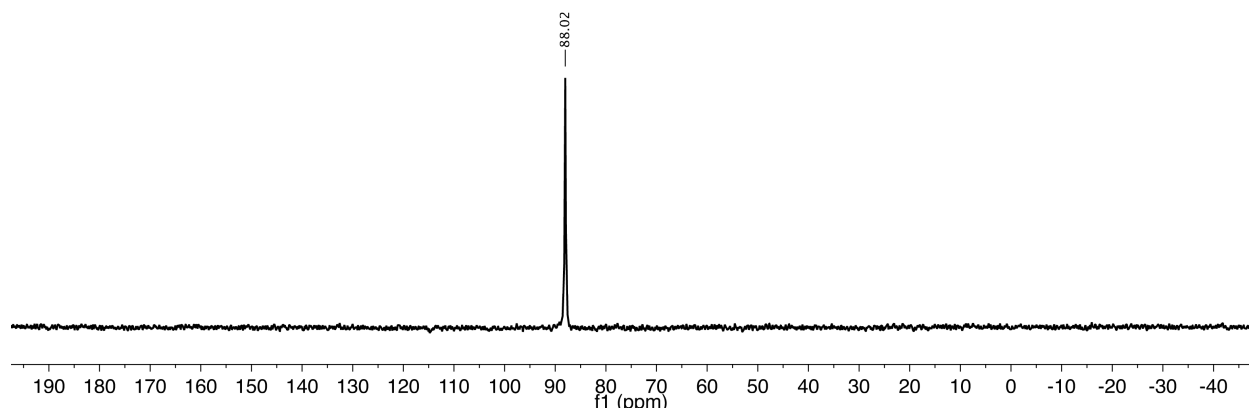

**Figure S20.**  $^{31}\text{P}$  NMR spectrum of  $(^{\text{Ph}}\text{DPB})\text{Fe}(\text{NNSi}_2)$  in  $\text{C}_6\text{D}_6$  (**6b**)

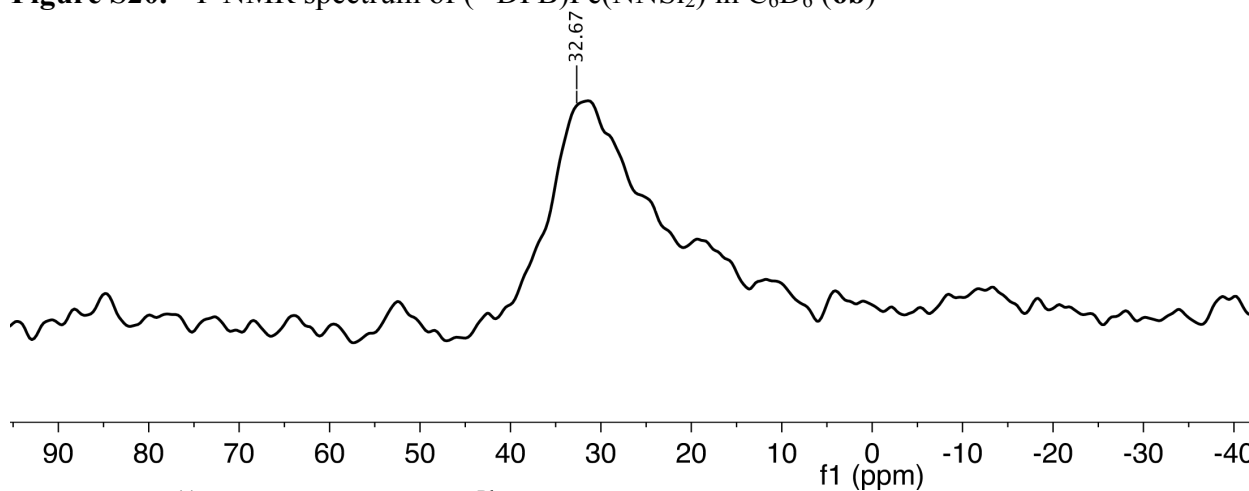

**Figure S21.**  $^{11}\text{B}$  NMR spectrum of  $(^{\text{Ph}}\text{DPB})\text{Fe}(\text{NNSi}_2)$  in  $\text{C}_6\text{D}_6$  (**6b**)

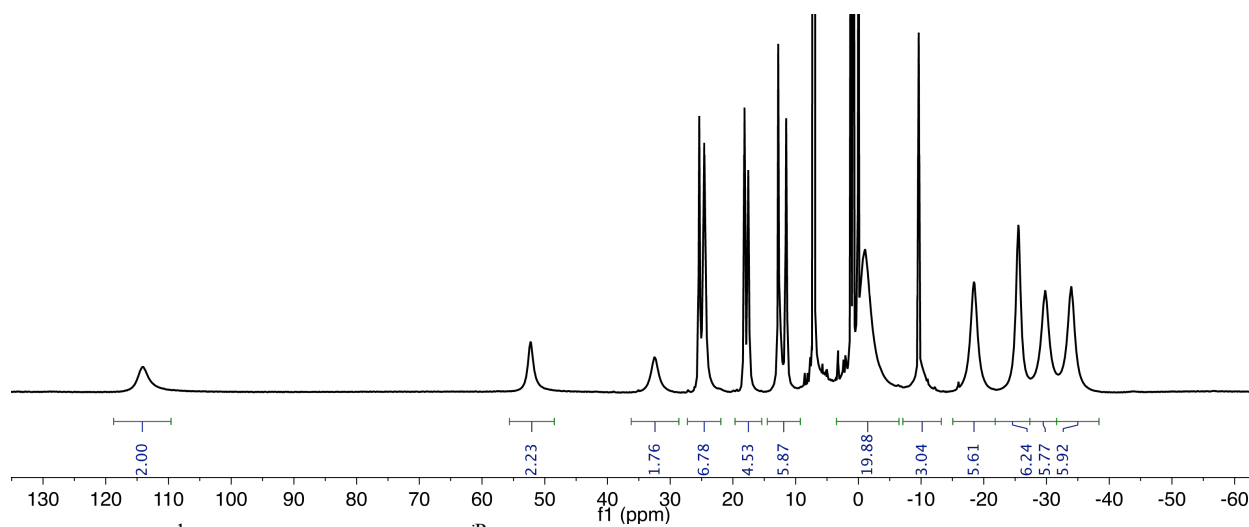

**Figure S22.**  $^1\text{H}$  NMR spectrum of  $(^{\text{iPr}}\text{DPB-H})\text{Fe}(\text{N}(\text{Si})\text{NSi}_2)$  in  $\text{C}_6\text{D}_6$  (**7**)

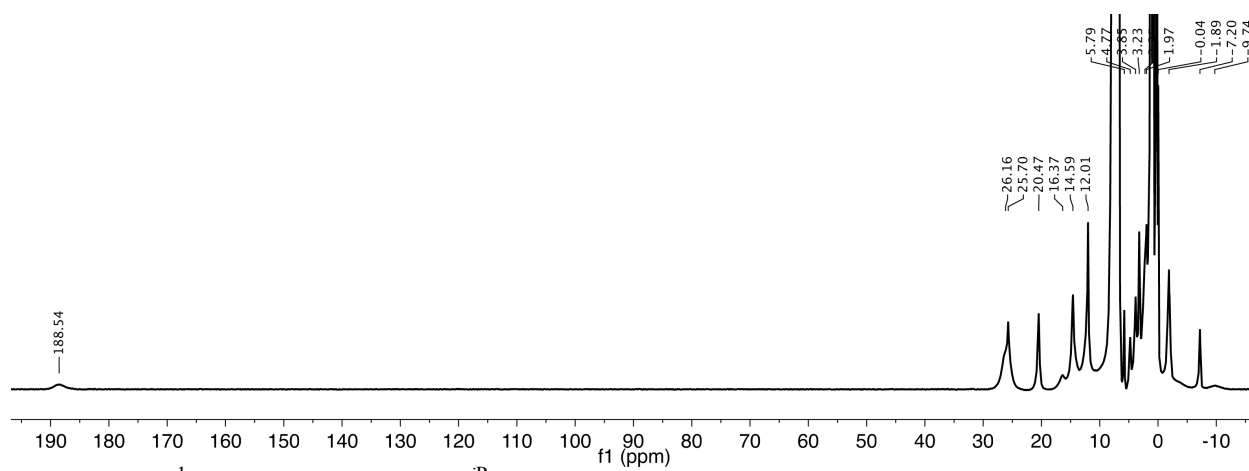

**Figure S23.**  $^1\text{H}$  NMR spectrum of  $(i\text{Pr})\text{DPB-H}*\text{Fe}(\text{N}(\text{Si})\text{NSi}_2)$  in  $\text{C}_6\text{D}_6$  (**8**)

## UV/vis spectra

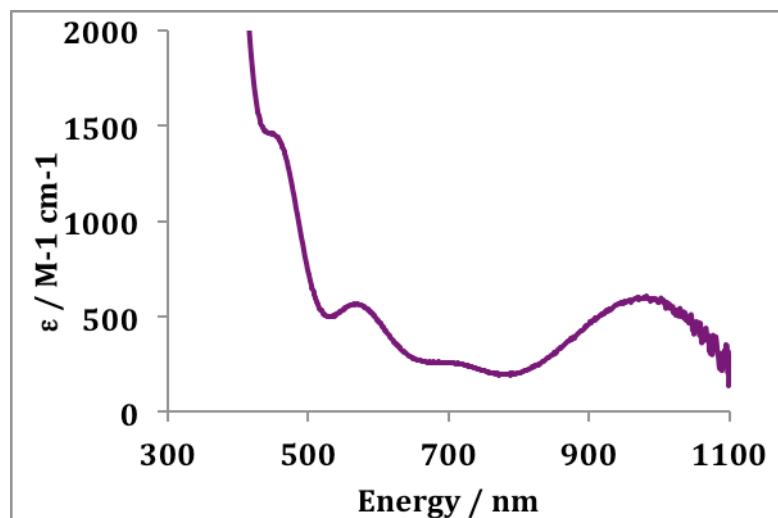

Figure S24. UV/vis spectrum of ( $i\text{PrDPB}$ )FeBr (**3a**) in toluene.

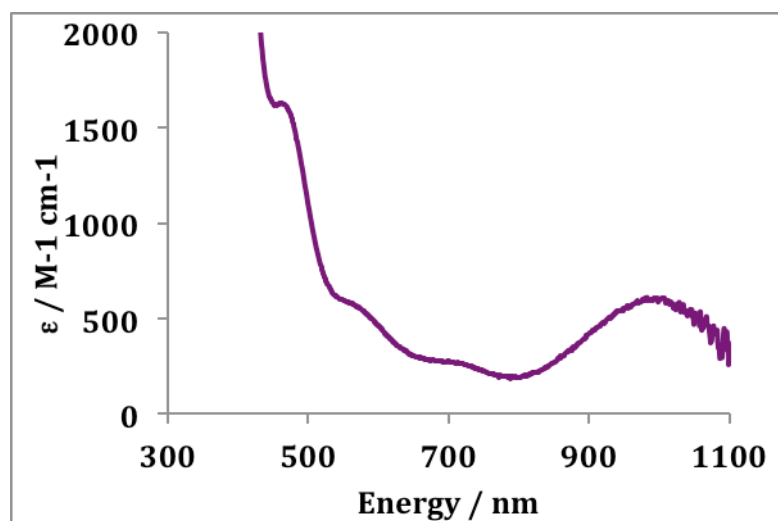

Figure S25. UV/vis spectrum of ( $\text{PhDPB}$ )FeBr (**3b**) in toluene.

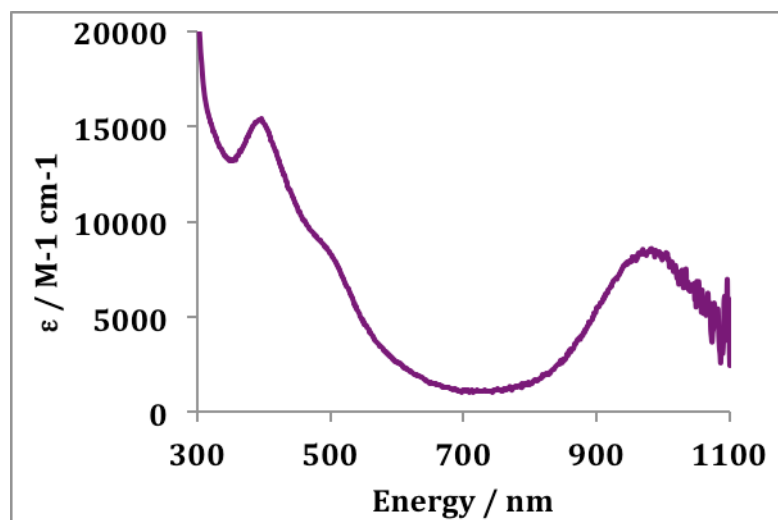

**Figure S26.** UV/vis spectrum of  $[(iPrDPB)Fe]_2(\mu-1,2-N_2)$  (**4**) in toluene.

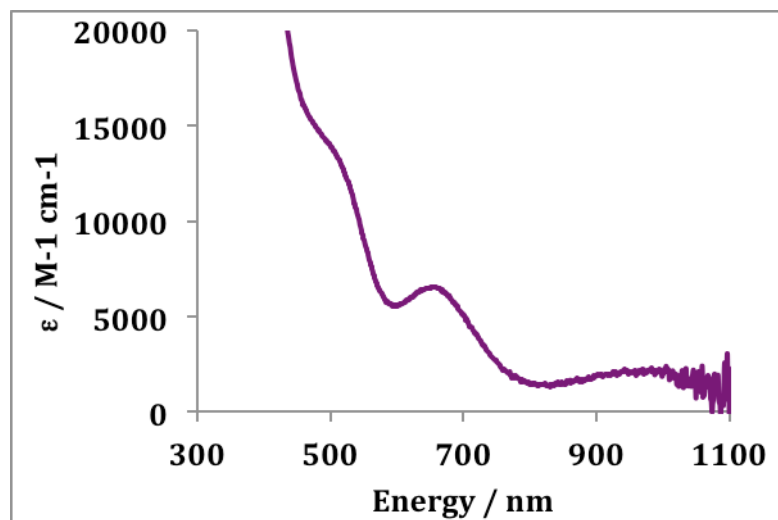

**Figure S27.** UV/vis spectrum of  $(PhDPB)Fe$  (**5**) in toluene.



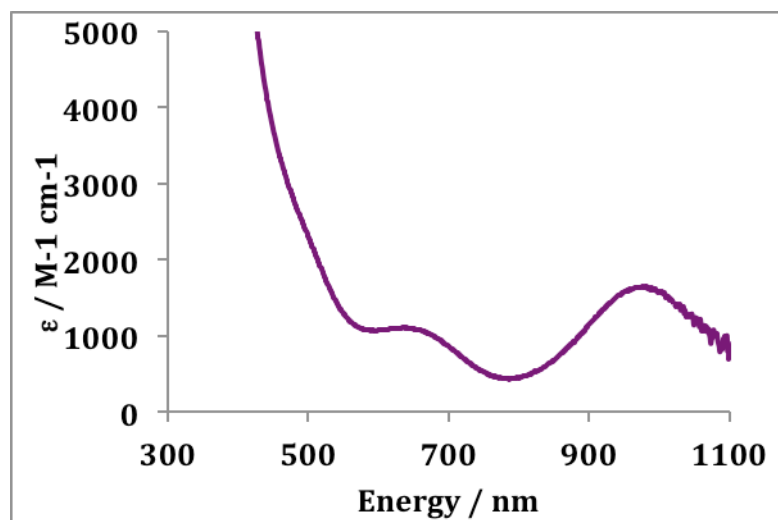

**Figure S28.** UV/vis spectrum of (<sup>i</sup>PrDPB)FeNNSi<sub>2</sub> (**6a**) in toluene.

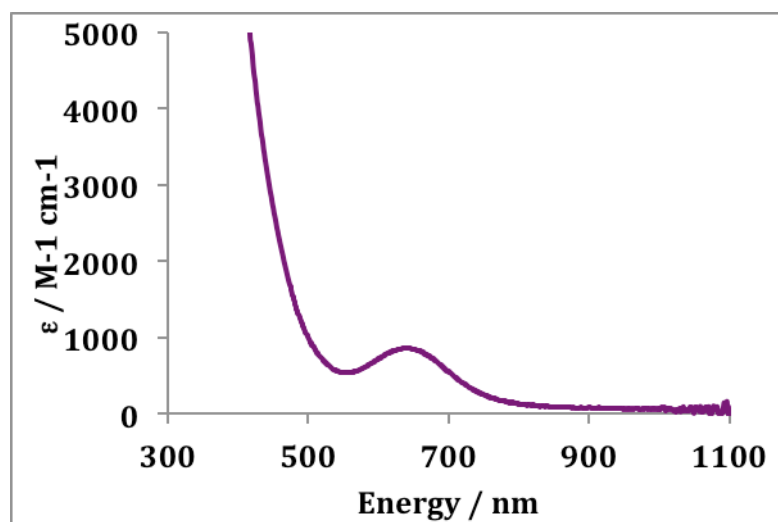

**Figure S29.** UV/vis spectrum of (<sup>Ph</sup>DPB)FeNNSi<sub>2</sub> (**6b**) in toluene.

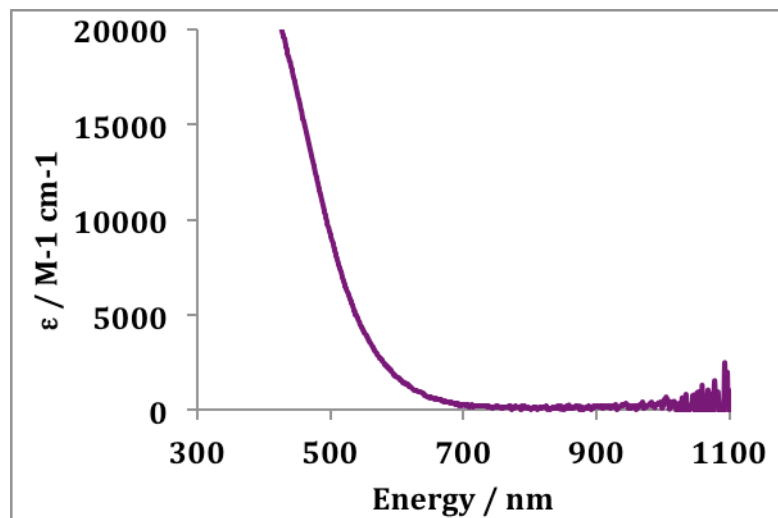

**Figure S30.** UV/vis spectrum of ( $i\text{PrDPB-H}$ )Fe(N(Si)NSi<sub>2</sub>) (**7**) in toluene.

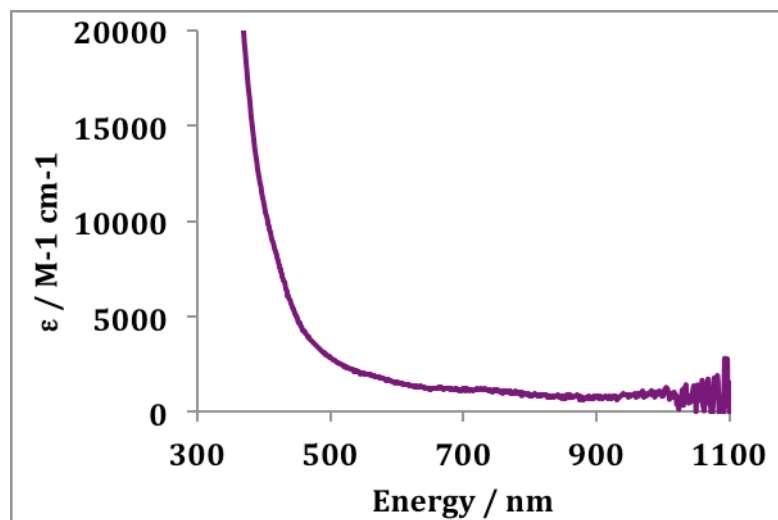

**Figure S31.** UV/vis spectrum of ( $\text{PhDPB-H}$ )\*Fe(N(H)NSi<sub>2</sub>) (**8**) in toluene.

## IR spectra

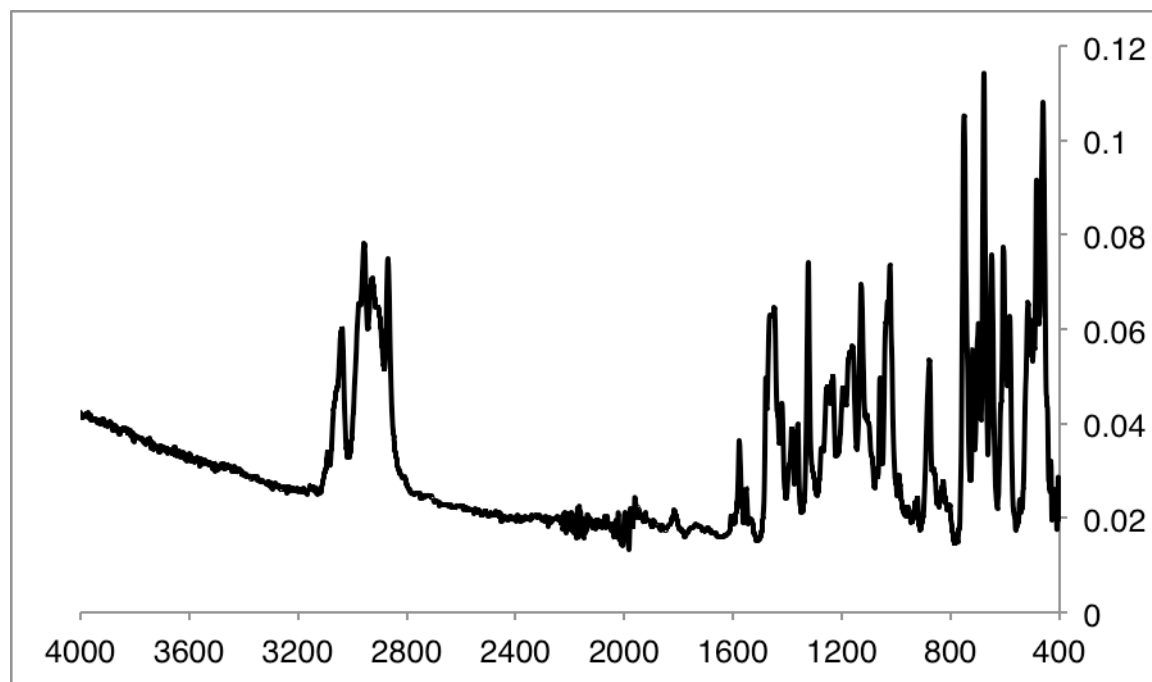

**Figure S32.** Thin film ( $C_6D_6$ ) IR spectrum of  $[(iPrDPB)Fe]_2(\mu-1,2-N_2)$  (4)

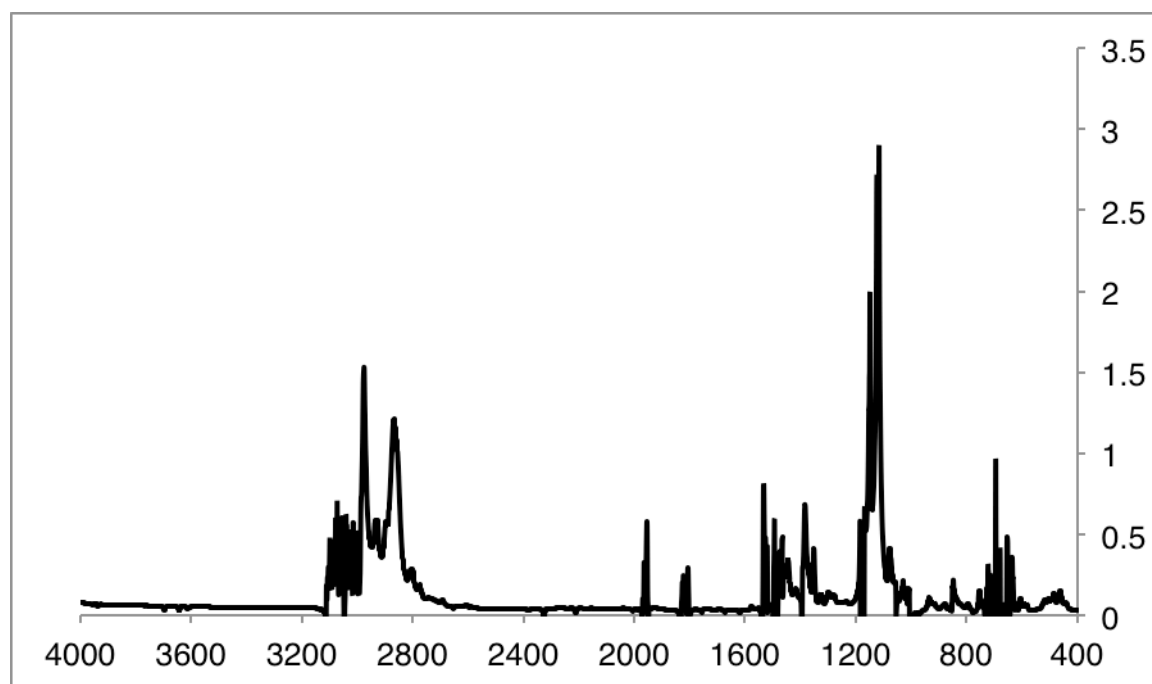

**Figure S33.** Solution IR spectrum (benzene) of  $[(iPrDPB)Fe]_2(\mu-1,2-N_2)$  (4). The small, sharp features at  $\sim 1960$  and  $\sim 1820$   $cm^{-1}$  arise from imperfect subtraction of solvent.

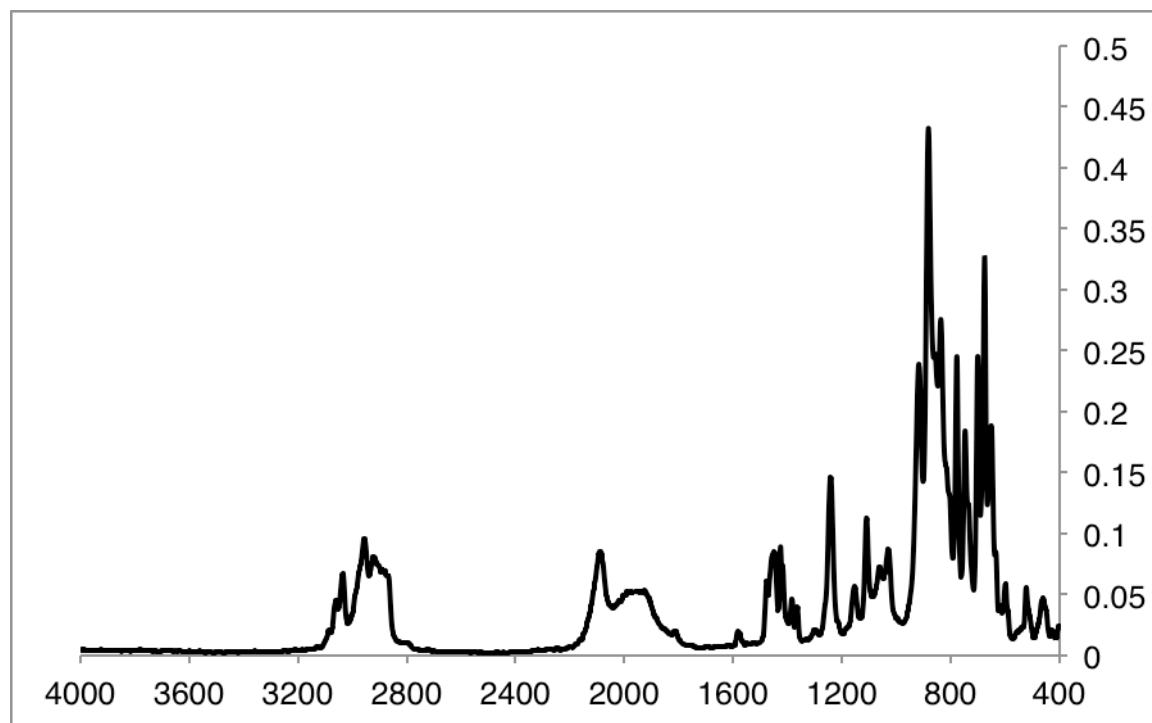

**Figure S34.** Thin film ( $C_6D_6$ ) IR spectrum of ( $iPrDPB-H$ )Fe(N(Si)NSi<sub>2</sub>) (**7**).

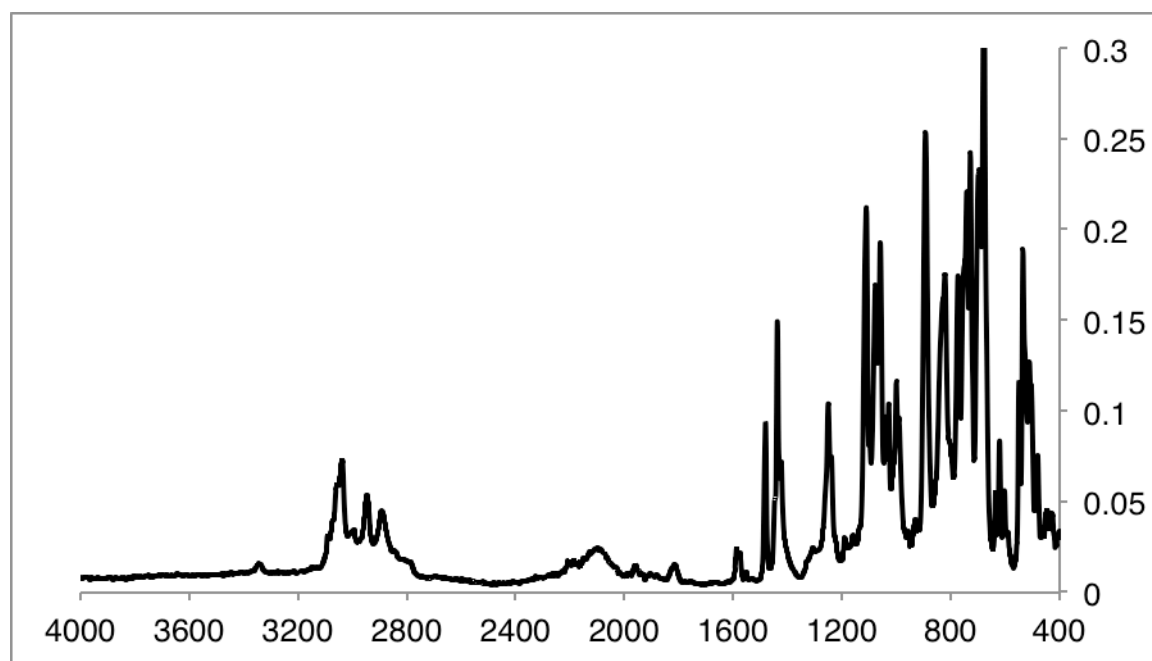

**Figure S35.** Thin film ( $C_6D_6$ ) IR spectrum of ( $PhDPB^*-H$ )Fe(N(H)NSi<sub>2</sub>) (**8**).

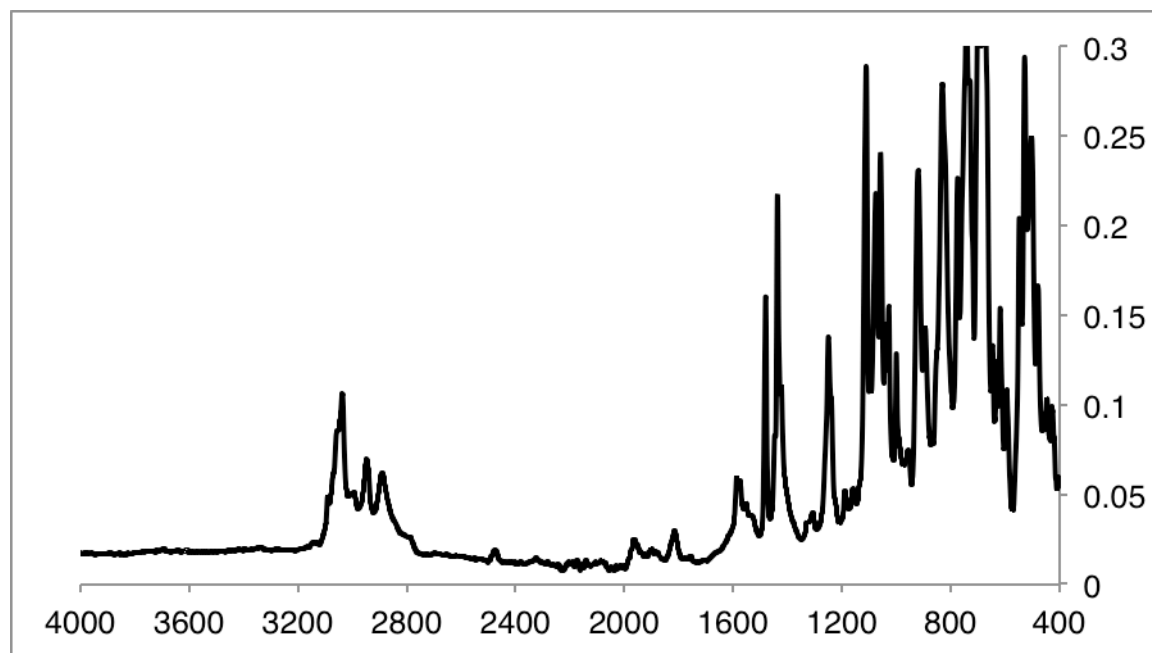

**Figure S36.** Thin film ( $C_6D_6$ ) IR spectrum of  $(^{Ph}DPB^*-D)Fe(N(D)NSi_2)$  (**8**- $D_2$ ).

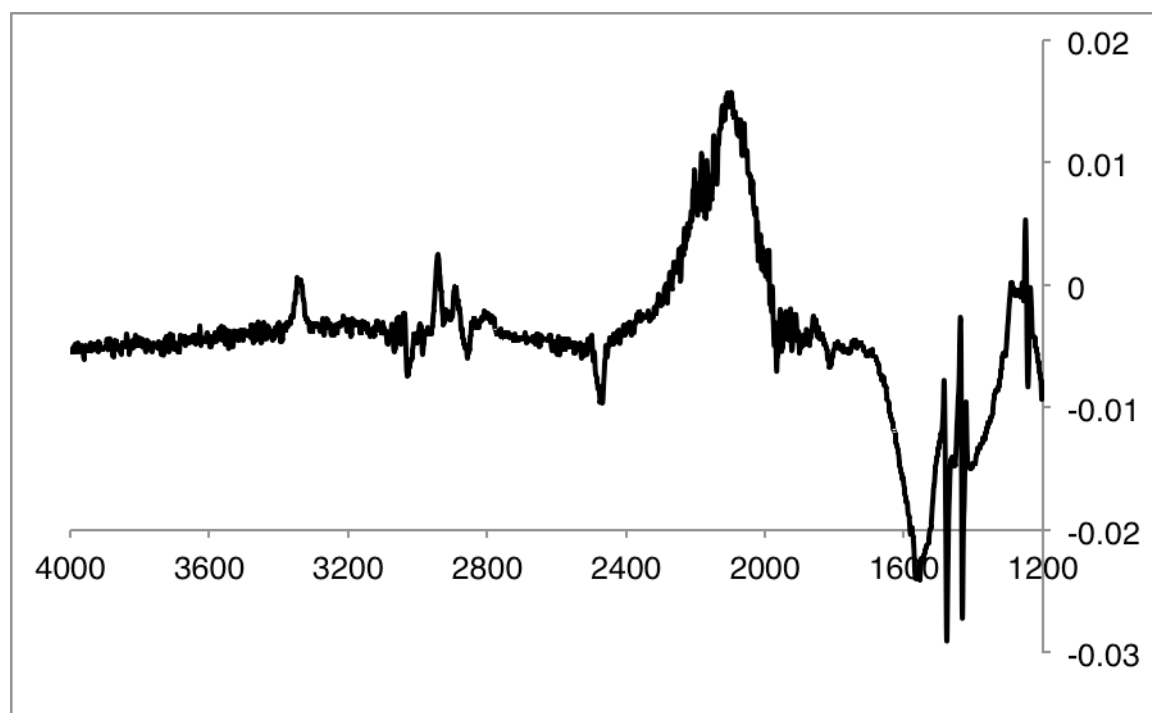

**Figure S37.** Thin film ( $C_6D_6$ ) subtraction IR spectrum of **8** - **8**- $D_2$ . The features at ca. 2900 and ca. 1480  $cm^{-1}$  correspond to imperfect subtraction of the intense C–H stretching modes and aryl breathing modes, respectively.

X-ray diffraction TablesTable S4. Crystal data and structure refinement for **3a**.

|                                   |                                                        |                              |
|-----------------------------------|--------------------------------------------------------|------------------------------|
| Identification code               | <b>3a</b>                                              |                              |
| Empirical formula                 | C <sub>30</sub> H <sub>41</sub> B Br Fe P <sub>2</sub> |                              |
| Formula weight                    | 610.14                                                 |                              |
| Temperature                       | 100(2) K                                               |                              |
| Wavelength                        | 0.71073 Å                                              |                              |
| Crystal system                    | Monoclinic                                             |                              |
| Space group                       | C2/c                                                   |                              |
| Unit cell dimensions              | a = 18.921(3) Å                                        | $\alpha = 90^\circ$ .        |
|                                   | b = 9.9768(12) Å                                       | $\beta = 104.872(8)^\circ$ . |
|                                   | c = 31.705(4) Å                                        | $\gamma = 90^\circ$ .        |
| Volume                            | 5784.4(13) Å <sup>3</sup>                              |                              |
| Z                                 | 8                                                      |                              |
| Density (calculated)              | 1.401 Mg/m <sup>3</sup>                                |                              |
| Absorption coefficient            | 2.031 mm <sup>-1</sup>                                 |                              |
| F(000)                            | 2536                                                   |                              |
| Crystal size                      | 0.388 x 0.312 x 0.298 mm <sup>3</sup>                  |                              |
| Theta range for data collection   | 2.23 to 44.08°.                                        |                              |
| Index ranges                      | -36<=h<=36, -19<=k<=19, -59<=l<=62                     |                              |
| Reflections collected             | 130537                                                 |                              |
| Independent reflections           | 22550 [R(int) = 0.0437]                                |                              |
| Completeness to theta = 44.08°    | 99.3 %                                                 |                              |
| Absorption correction             | None                                                   |                              |
| Refinement method                 | Full-matrix least-squares on F <sup>2</sup>            |                              |
| Data / restraints / parameters    | 22550 / 0 / 344                                        |                              |
| Goodness-of-fit on F <sup>2</sup> | 1.039                                                  |                              |
| Final R indices [I>2sigma(I)]     | R1 = 0.0414, wR2 = 0.0929                              |                              |
| R indices (all data)              | R1 = 0.0675, wR2 = 0.1012                              |                              |
| Largest diff. peak and hole       | 0.987 and -1.739 e.Å <sup>-3</sup>                     |                              |

Table S5. Atomic coordinates ( $\times 10^4$ ) and equivalent isotropic displacement parameters ( $\text{\AA}^2 \times 10^3$ ) for **3a**.  $U(\text{eq})$  is defined as one third of the trace of the orthogonalized  $U^{\text{ij}}$  tensor.

|       | x       | y        | z       | $U(\text{eq})$ |
|-------|---------|----------|---------|----------------|
| Fe(1) | 6363(1) | 2789(1)  | 6064(1) | 10(1)          |
| Br(1) | 5830(1) | 4941(1)  | 5865(1) | 21(1)          |
| P(2)  | 6150(1) | 2174(1)  | 6746(1) | 11(1)          |
| P(1)  | 7650(1) | 2649(1)  | 6151(1) | 11(1)          |
| C(8)  | 7264(1) | 163(1)   | 5842(1) | 12(1)          |
| C(7)  | 7803(1) | 1153(1)  | 5861(1) | 13(1)          |
| C(16) | 8327(1) | 2389(1)  | 6691(1) | 13(1)          |
| C(1)  | 5872(1) | 1034(1)  | 5638(1) | 11(1)          |
| C(28) | 5278(1) | 2656(1)  | 6878(1) | 15(1)          |
| C(25) | 6879(1) | 2687(1)  | 7239(1) | 13(1)          |
| C(27) | 7110(1) | 4152(1)  | 7200(1) | 16(1)          |
| C(19) | 6147(1) | 341(1)   | 6750(1) | 12(1)          |
| C(6)  | 5135(1) | 819(1)   | 5650(1) | 16(1)          |
| C(20) | 6372(1) | -301(1)  | 6407(1) | 12(1)          |
| C(2)  | 5977(1) | 1847(1)  | 5292(1) | 15(1)          |
| C(4)  | 4677(1) | 2140(1)  | 5000(1) | 20(1)          |
| C(30) | 4620(1) | 2158(1)  | 6524(1) | 22(1)          |
| C(13) | 8026(1) | 4091(1)  | 5911(1) | 16(1)          |
| C(29) | 5216(1) | 4176(1)  | 6934(1) | 19(1)          |
| B(1)  | 6544(1) | 499(1)   | 6005(1) | 11(1)          |
| C(26) | 6715(1) | 2433(1)  | 7682(1) | 19(1)          |
| C(18) | 8278(1) | 937(1)   | 6846(1) | 16(1)          |
| C(24) | 5940(1) | -412(1)  | 7075(1) | 16(1)          |
| C(3)  | 5389(1) | 2407(1)  | 4982(1) | 20(1)          |
| C(21) | 6400(1) | -1714(1) | 6417(1) | 17(1)          |
| C(23) | 5975(1) | -1808(1) | 7072(1) | 17(1)          |
| C(10) | 8004(1) | -1324(1) | 5511(1) | 19(1)          |
| C(12) | 8428(1) | 917(1)   | 5708(1) | 17(1)          |
| C(17) | 9124(1) | 2698(1)  | 6696(1) | 21(1)          |
| C(9)  | 7380(1) | -1082(1) | 5658(1) | 16(1)          |
| C(11) | 8532(1) | -330(1)  | 5536(1) | 20(1)          |

|       |         |          |         |       |
|-------|---------|----------|---------|-------|
| C(22) | 6204(1) | -2456(1) | 6742(1) | 18(1) |
| C(15) | 7614(1) | 4265(1)  | 5432(1) | 21(1) |
| C(5)  | 4552(1) | 1330(1)  | 5331(1) | 20(1) |
| C(14) | 7963(1) | 5362(1)  | 6172(1) | 22(1) |

---



Table S6. Bond lengths [ $\text{\AA}$ ] and angles [ $^\circ$ ] for **3a**.

---

|              |            |
|--------------|------------|
| Fe(1)-C(1)   | 2.2608(9)  |
| Fe(1)-B(1)   | 2.3243(11) |
| Fe(1)-P(2)   | 2.3785(4)  |
| Fe(1)-P(1)   | 2.3835(5)  |
| Fe(1)-Br(1)  | 2.3870(3)  |
| Fe(1)-C(2)   | 2.5486(11) |
| Fe(1)-C(6)   | 3.0692(12) |
| P(2)-C(19)   | 1.8286(10) |
| P(2)-C(28)   | 1.8666(11) |
| P(2)-C(25)   | 1.8711(10) |
| P(1)-C(7)    | 1.8155(10) |
| P(1)-C(13)   | 1.8532(11) |
| P(1)-C(16)   | 1.8737(10) |
| C(8)-C(7)    | 1.4105(14) |
| C(8)-C(9)    | 1.4124(14) |
| C(8)-B(1)    | 1.6136(15) |
| C(7)-C(12)   | 1.4074(15) |
| C(16)-C(17)  | 1.5346(15) |
| C(16)-C(18)  | 1.5395(15) |
| C(16)-H(16)  | 1.0000     |
| C(1)-C(2)    | 1.4191(14) |
| C(1)-C(6)    | 1.4212(15) |
| C(1)-B(1)    | 1.5789(14) |
| C(28)-C(30)  | 1.5307(16) |
| C(28)-C(29)  | 1.5353(16) |
| C(28)-H(28)  | 1.0000     |
| C(25)-C(26)  | 1.5349(15) |
| C(25)-C(27)  | 1.5400(15) |
| C(25)-H(25)  | 1.0000     |
| C(27)-H(27A) | 0.9800     |
| C(27)-H(27B) | 0.9800     |
| C(27)-H(27C) | 0.9800     |
| C(19)-C(24)  | 1.4073(14) |
| C(19)-C(20)  | 1.4195(14) |

|              |            |
|--------------|------------|
| C(6)-C(5)    | 1.3880(16) |
| C(6)-H(6)    | 0.92(2)    |
| C(20)-C(21)  | 1.4101(14) |
| C(20)-B(1)   | 1.6057(15) |
| C(2)-C(3)    | 1.3977(15) |
| C(2)-H(2)    | 0.921(19)  |
| C(4)-C(3)    | 1.3891(18) |
| C(4)-C(5)    | 1.3935(18) |
| C(4)-H(4)    | 0.918(19)  |
| C(30)-H(30A) | 0.9800     |
| C(30)-H(30B) | 0.9800     |
| C(30)-H(30C) | 0.9800     |
| C(13)-C(15)  | 1.5292(15) |
| C(13)-C(14)  | 1.5363(17) |
| C(13)-H(13)  | 1.0000     |
| C(29)-H(29A) | 0.9800     |
| C(29)-H(29B) | 0.9800     |
| C(29)-H(29C) | 0.9800     |
| C(26)-H(26A) | 0.9800     |
| C(26)-H(26B) | 0.9800     |
| C(26)-H(26C) | 0.9800     |
| C(18)-H(18A) | 0.9800     |
| C(18)-H(18B) | 0.9800     |
| C(18)-H(18C) | 0.9800     |
| C(24)-C(23)  | 1.3939(16) |
| C(24)-H(24)  | 0.9500     |
| C(3)-H(3)    | 0.962(19)  |
| C(21)-C(22)  | 1.3939(16) |
| C(21)-H(21)  | 0.9500     |
| C(23)-C(22)  | 1.3896(18) |
| C(23)-H(23)  | 0.9500     |
| C(10)-C(11)  | 1.3952(19) |
| C(10)-C(9)   | 1.3976(16) |
| C(10)-H(10)  | 0.9500     |
| C(12)-C(11)  | 1.3930(17) |
| C(12)-H(12)  | 0.9500     |

|                  |             |
|------------------|-------------|
| C(17)-H(17A)     | 0.9800      |
| C(17)-H(17B)     | 0.9800      |
| C(17)-H(17C)     | 0.9800      |
| C(9)-H(9)        | 0.9500      |
| C(11)-H(11)      | 0.9500      |
| C(22)-H(22)      | 0.9500      |
| C(15)-H(15A)     | 0.9800      |
| C(15)-H(15B)     | 0.9800      |
| C(15)-H(15C)     | 0.9800      |
| C(5)-H(5)        | 1.00(2)     |
| C(14)-H(14A)     | 0.9800      |
| C(14)-H(14B)     | 0.9800      |
| C(14)-H(14C)     | 0.9800      |
|                  |             |
| C(1)-Fe(1)-B(1)  | 40.25(4)    |
| C(1)-Fe(1)-P(2)  | 101.74(3)   |
| B(1)-Fe(1)-P(2)  | 83.23(3)    |
| C(1)-Fe(1)-P(1)  | 105.95(3)   |
| B(1)-Fe(1)-P(1)  | 77.58(3)    |
| P(2)-Fe(1)-P(1)  | 106.609(12) |
| C(1)-Fe(1)-Br(1) | 117.23(3)   |
| B(1)-Fe(1)-Br(1) | 157.42(3)   |
| P(2)-Fe(1)-Br(1) | 108.270(9)  |
| P(1)-Fe(1)-Br(1) | 115.703(10) |
| C(1)-Fe(1)-C(2)  | 33.65(3)    |
| B(1)-Fe(1)-C(2)  | 64.64(4)    |
| P(2)-Fe(1)-C(2)  | 134.75(3)   |
| P(1)-Fe(1)-C(2)  | 97.02(3)    |
| Br(1)-Fe(1)-C(2) | 94.61(3)    |
| C(1)-Fe(1)-C(6)  | 25.64(3)    |
| B(1)-Fe(1)-C(6)  | 56.41(4)    |
| P(2)-Fe(1)-C(6)  | 86.38(2)    |
| P(1)-Fe(1)-C(6)  | 130.61(2)   |
| Br(1)-Fe(1)-C(6) | 103.91(2)   |
| C(2)-Fe(1)-C(6)  | 49.76(3)    |
| C(19)-P(2)-C(28) | 104.54(5)   |

|                   |            |
|-------------------|------------|
| C(19)-P(2)-C(25)  | 105.72(4)  |
| C(28)-P(2)-C(25)  | 104.27(5)  |
| C(19)-P(2)-Fe(1)  | 105.47(3)  |
| C(28)-P(2)-Fe(1)  | 120.18(4)  |
| C(25)-P(2)-Fe(1)  | 115.35(4)  |
| C(7)-P(1)-C(13)   | 107.52(5)  |
| C(7)-P(1)-C(16)   | 100.89(5)  |
| C(13)-P(1)-C(16)  | 103.81(5)  |
| C(7)-P(1)-Fe(1)   | 106.31(3)  |
| C(13)-P(1)-Fe(1)  | 113.28(4)  |
| C(16)-P(1)-Fe(1)  | 123.55(3)  |
| C(7)-C(8)-C(9)    | 116.53(9)  |
| C(7)-C(8)-B(1)    | 120.12(9)  |
| C(9)-C(8)-B(1)    | 123.28(9)  |
| C(12)-C(7)-C(8)   | 122.01(10) |
| C(12)-C(7)-P(1)   | 124.72(8)  |
| C(8)-C(7)-P(1)    | 112.94(7)  |
| C(17)-C(16)-C(18) | 108.96(9)  |
| C(17)-C(16)-P(1)  | 114.84(7)  |
| C(18)-C(16)-P(1)  | 109.75(7)  |
| C(17)-C(16)-H(16) | 107.7      |
| C(18)-C(16)-H(16) | 107.7      |
| P(1)-C(16)-H(16)  | 107.7      |
| C(2)-C(1)-C(6)    | 116.12(9)  |
| C(2)-C(1)-B(1)    | 121.14(9)  |
| C(6)-C(1)-B(1)    | 122.59(9)  |
| C(2)-C(1)-Fe(1)   | 84.37(6)   |
| C(6)-C(1)-Fe(1)   | 110.87(7)  |
| B(1)-C(1)-Fe(1)   | 72.04(5)   |
| C(30)-C(28)-C(29) | 109.47(9)  |
| C(30)-C(28)-P(2)  | 110.59(8)  |
| C(29)-C(28)-P(2)  | 112.25(7)  |
| C(30)-C(28)-H(28) | 108.1      |
| C(29)-C(28)-H(28) | 108.1      |
| P(2)-C(28)-H(28)  | 108.1      |
| C(26)-C(25)-C(27) | 111.00(9)  |

|                     |            |
|---------------------|------------|
| C(26)-C(25)-P(2)    | 116.11(8)  |
| C(27)-C(25)-P(2)    | 110.87(7)  |
| C(26)-C(25)-H(25)   | 106.0      |
| C(27)-C(25)-H(25)   | 106.0      |
| P(2)-C(25)-H(25)    | 106.0      |
| C(25)-C(27)-H(27A)  | 109.5      |
| C(25)-C(27)-H(27B)  | 109.5      |
| H(27A)-C(27)-H(27B) | 109.5      |
| C(25)-C(27)-H(27C)  | 109.5      |
| H(27A)-C(27)-H(27C) | 109.5      |
| H(27B)-C(27)-H(27C) | 109.5      |
| C(24)-C(19)-C(20)   | 120.90(9)  |
| C(24)-C(19)-P(2)    | 122.79(8)  |
| C(20)-C(19)-P(2)    | 116.31(7)  |
| C(5)-C(6)-C(1)      | 121.73(10) |
| C(5)-C(6)-Fe(1)     | 116.66(8)  |
| C(1)-C(6)-Fe(1)     | 43.49(5)   |
| C(5)-C(6)-H(6)      | 120.9(13)  |
| C(1)-C(6)-H(6)      | 117.2(13)  |
| Fe(1)-C(6)-H(6)     | 107.6(13)  |
| C(21)-C(20)-C(19)   | 116.77(9)  |
| C(21)-C(20)-B(1)    | 120.09(9)  |
| C(19)-C(20)-B(1)    | 123.04(8)  |
| C(3)-C(2)-C(1)      | 121.90(10) |
| C(3)-C(2)-Fe(1)     | 120.53(8)  |
| C(1)-C(2)-Fe(1)     | 61.98(5)   |
| C(3)-C(2)-H(2)      | 120.4(12)  |
| C(1)-C(2)-H(2)      | 117.5(12)  |
| Fe(1)-C(2)-H(2)     | 89.8(12)   |
| C(3)-C(4)-C(5)      | 119.64(10) |
| C(3)-C(4)-H(4)      | 118.2(12)  |
| C(5)-C(4)-H(4)      | 122.2(12)  |
| C(28)-C(30)-H(30A)  | 109.5      |
| C(28)-C(30)-H(30B)  | 109.5      |
| H(30A)-C(30)-H(30B) | 109.5      |
| C(28)-C(30)-H(30C)  | 109.5      |

|                     |            |
|---------------------|------------|
| H(30A)-C(30)-H(30C) | 109.5      |
| H(30B)-C(30)-H(30C) | 109.5      |
| C(15)-C(13)-C(14)   | 110.59(10) |
| C(15)-C(13)-P(1)    | 110.22(8)  |
| C(14)-C(13)-P(1)    | 109.11(8)  |
| C(15)-C(13)-H(13)   | 109.0      |
| C(14)-C(13)-H(13)   | 109.0      |
| P(1)-C(13)-H(13)    | 109.0      |
| C(28)-C(29)-H(29A)  | 109.5      |
| C(28)-C(29)-H(29B)  | 109.5      |
| H(29A)-C(29)-H(29B) | 109.5      |
| C(28)-C(29)-H(29C)  | 109.5      |
| H(29A)-C(29)-H(29C) | 109.5      |
| H(29B)-C(29)-H(29C) | 109.5      |
| C(1)-B(1)-C(20)     | 117.69(9)  |
| C(1)-B(1)-C(8)      | 114.86(8)  |
| C(20)-B(1)-C(8)     | 120.67(8)  |
| C(1)-B(1)-Fe(1)     | 67.71(5)   |
| C(20)-B(1)-Fe(1)    | 111.19(6)  |
| C(8)-B(1)-Fe(1)     | 112.60(7)  |
| C(25)-C(26)-H(26A)  | 109.5      |
| C(25)-C(26)-H(26B)  | 109.5      |
| H(26A)-C(26)-H(26B) | 109.5      |
| C(25)-C(26)-H(26C)  | 109.5      |
| H(26A)-C(26)-H(26C) | 109.5      |
| H(26B)-C(26)-H(26C) | 109.5      |
| C(16)-C(18)-H(18A)  | 109.5      |
| C(16)-C(18)-H(18B)  | 109.5      |
| H(18A)-C(18)-H(18B) | 109.5      |
| C(16)-C(18)-H(18C)  | 109.5      |
| H(18A)-C(18)-H(18C) | 109.5      |
| H(18B)-C(18)-H(18C) | 109.5      |
| C(23)-C(24)-C(19)   | 120.41(10) |
| C(23)-C(24)-H(24)   | 119.8      |
| C(19)-C(24)-H(24)   | 119.8      |
| C(4)-C(3)-C(2)      | 120.04(11) |

|                     |            |
|---------------------|------------|
| C(4)-C(3)-H(3)      | 118.7(12)  |
| C(2)-C(3)-H(3)      | 121.3(12)  |
| C(22)-C(21)-C(20)   | 122.16(10) |
| C(22)-C(21)-H(21)   | 118.9      |
| C(20)-C(21)-H(21)   | 118.9      |
| C(22)-C(23)-C(24)   | 119.61(10) |
| C(22)-C(23)-H(23)   | 120.2      |
| C(24)-C(23)-H(23)   | 120.2      |
| C(11)-C(10)-C(9)    | 120.80(10) |
| C(11)-C(10)-H(10)   | 119.6      |
| C(9)-C(10)-H(10)    | 119.6      |
| C(11)-C(12)-C(7)    | 119.99(11) |
| C(11)-C(12)-H(12)   | 120.0      |
| C(7)-C(12)-H(12)    | 120.0      |
| C(16)-C(17)-H(17A)  | 109.5      |
| C(16)-C(17)-H(17B)  | 109.5      |
| H(17A)-C(17)-H(17B) | 109.5      |
| C(16)-C(17)-H(17C)  | 109.5      |
| H(17A)-C(17)-H(17C) | 109.5      |
| H(17B)-C(17)-H(17C) | 109.5      |
| C(10)-C(9)-C(8)     | 121.56(11) |
| C(10)-C(9)-H(9)     | 119.2      |
| C(8)-C(9)-H(9)      | 119.2      |
| C(12)-C(11)-C(10)   | 119.09(10) |
| C(12)-C(11)-H(11)   | 120.5      |
| C(10)-C(11)-H(11)   | 120.5      |
| C(23)-C(22)-C(21)   | 120.13(10) |
| C(23)-C(22)-H(22)   | 119.9      |
| C(21)-C(22)-H(22)   | 119.9      |
| C(13)-C(15)-H(15A)  | 109.5      |
| C(13)-C(15)-H(15B)  | 109.5      |
| H(15A)-C(15)-H(15B) | 109.5      |
| C(13)-C(15)-H(15C)  | 109.5      |
| H(15A)-C(15)-H(15C) | 109.5      |
| H(15B)-C(15)-H(15C) | 109.5      |
| C(6)-C(5)-C(4)      | 120.47(11) |

|                     |           |
|---------------------|-----------|
| C(6)-C(5)-H(5)      | 121.7(12) |
| C(4)-C(5)-H(5)      | 117.8(12) |
| C(13)-C(14)-H(14A)  | 109.5     |
| C(13)-C(14)-H(14B)  | 109.5     |
| H(14A)-C(14)-H(14B) | 109.5     |
| C(13)-C(14)-H(14C)  | 109.5     |
| H(14A)-C(14)-H(14C) | 109.5     |
| H(14B)-C(14)-H(14C) | 109.5     |

---

Symmetry transformations used to generate equivalent atoms:



Table S7. Crystal data and structure refinement for **3b**.

|                                   |                                                        |                 |
|-----------------------------------|--------------------------------------------------------|-----------------|
| Identification code               | <b>3b</b>                                              |                 |
| Empirical formula                 | C <sub>42</sub> H <sub>33</sub> B Br Fe P <sub>2</sub> |                 |
| Formula weight                    | 373.10                                                 |                 |
| Temperature                       | 100(2) K                                               |                 |
| Wavelength                        | 0.71073 Å                                              |                 |
| Crystal system                    | Triclinic                                              |                 |
| Space group                       | P-1                                                    |                 |
| Unit cell dimensions              | a = 9.6143(6) Å                                        | α = 87.525(3)°. |
|                                   | b = 9.7710(5) Å                                        | β = 88.376(4)°. |
|                                   | c = 19.9222(14) Å                                      | γ = 68.912(2)°. |
| Volume                            | 1744.39(19) Å <sup>3</sup>                             |                 |
| Z                                 | 2                                                      |                 |
| Density (calculated)              | 1.421 Mg/m <sup>3</sup>                                |                 |
| Absorption coefficient            | 1.699 mm <sup>-1</sup>                                 |                 |
| F(000)                            | 762                                                    |                 |
| Crystal size                      | 0.18 x 0.16 x 0.08 mm <sup>3</sup>                     |                 |
| Theta range for data collection   | 2.05 to 27.11°.                                        |                 |
| Index ranges                      | -12 ≤ h ≤ 12, -12 ≤ k ≤ 12, -25 ≤ l ≤ 25               |                 |
| Reflections collected             | 66744                                                  |                 |
| Independent reflections           | 7693 [R(int) = 0.0822]                                 |                 |
| Completeness to theta = 25.00°    | 99.9 %                                                 |                 |
| Absorption correction             | None                                                   |                 |
| Refinement method                 | Full-matrix least-squares on F <sup>2</sup>            |                 |
| Data / restraints / parameters    | 7693 / 434 / 444                                       |                 |
| Goodness-of-fit on F <sup>2</sup> | 1.038                                                  |                 |
| Final R indices [I > 2σ(I)]       | R1 = 0.0461, wR2 = 0.1122                              |                 |
| R indices (all data)              | R1 = 0.0774, wR2 = 0.1196                              |                 |
| Largest diff. peak and hole       | 0.545 and -0.474 e.Å <sup>-3</sup>                     |                 |

Table S8. Atomic coordinates ( $\times 10^4$ ) and equivalent isotropic displacement parameters ( $\text{\AA}^2 \times 10^3$ ) for **3b**.  $U(\text{eq})$  is defined as one third of the trace of the orthogonalized  $U^j$  tensor.

|       | x        | y        | z       | $U(\text{eq})$ |
|-------|----------|----------|---------|----------------|
| Br(1) | -2836(1) | 759(1)   | 2486(1) | 30(1)          |
| Fe(1) | -789(1)  | 1515(1)  | 2502(1) | 18(1)          |
| P(1)  | -873(1)  | 2928(1)  | 1512(1) | 18(1)          |
| P(2)  | -1099(1) | 2964(1)  | 3446(1) | 21(1)          |
| C(13) | -1914(4) | 4892(4)  | 1506(2) | 21(1)          |
| C(31) | -2217(4) | 4913(4)  | 3380(2) | 26(1)          |
| C(1)  | 1554(3)  | 62(4)    | 2571(2) | 22(1)          |
| C(7)  | 1027(4)  | 2724(4)  | 1282(2) | 21(1)          |
| C(25) | 736(4)   | 2851(4)  | 3700(2) | 23(1)          |
| C(8)  | 2050(4)  | 2208(4)  | 1808(2) | 23(1)          |
| C(27) | 3283(4)  | 2301(4)  | 3378(2) | 28(1)          |
| C(18) | -1205(4) | 5898(4)  | 1468(2) | 35(1)          |
| C(30) | 1035(4)  | 3263(4)  | 4327(2) | 29(1)          |
| C(14) | -3456(4) | 5381(4)  | 1557(2) | 30(1)          |
| C(32) | -1625(4) | 5988(4)  | 3477(2) | 34(1)          |
| C(26) | 1867(4)  | 2327(4)  | 3208(2) | 21(1)          |
| C(38) | -1868(4) | 939(4)   | 4248(2) | 33(1)          |
| C(15) | -4279(4) | 6889(4)  | 1550(2) | 33(1)          |
| C(20) | -1507(4) | 900(4)   | 757(2)  | 28(1)          |
| C(12) | 1460(4)  | 3048(4)  | 633(2)  | 27(1)          |
| C(5)  | 1407(4)  | -2077(4) | 2026(2) | 30(1)          |
| C(9)  | 3522(4)  | 2066(4)  | 1652(2) | 32(1)          |
| C(6)  | 1535(4)  | -715(4)  | 1986(2) | 26(1)          |
| C(28) | 3577(4)  | 2709(4)  | 3998(2) | 35(1)          |
| C(10) | 3964(4)  | 2392(4)  | 1014(2) | 34(1)          |
| C(19) | -1635(4) | 2359(4)  | 785(2)  | 22(1)          |
| C(2)  | 1354(4)  | -623(4)  | 3180(2) | 26(1)          |
| C(17) | -2054(5) | 7398(4)  | 1481(2) | 45(1)          |
| C(42) | -2776(4) | 3368(4)  | 4671(2) | 29(1)          |
| C(36) | -3726(4) | 5312(4)  | 3235(2) | 34(1)          |
| C(3)  | 1223(4)  | -1990(4) | 3210(2) | 29(1)          |

|       |          |          |         |       |
|-------|----------|----------|---------|-------|
| C(24) | -2396(4) | 3329(4)  | 274(2)  | 32(1) |
| C(16) | -3578(5) | 7887(4)  | 1515(2) | 36(1) |
| C(41) | -3424(4) | 2886(4)  | 5205(2) | 33(1) |
| C(37) | -1963(4) | 2387(4)  | 4181(2) | 22(1) |
| C(4)  | 1252(4)  | -2724(4) | 2637(2) | 31(1) |
| C(29) | 2449(4)  | 3193(4)  | 4475(2) | 33(1) |
| C(22) | -2906(4) | 1420(5)  | -254(2) | 37(1) |
| C(23) | -3024(5) | 2859(5)  | -238(2) | 41(1) |
| C(34) | -4039(5) | 7857(4)  | 3291(2) | 43(1) |
| C(11) | 2929(4)  | 2869(4)  | 499(2)  | 32(1) |
| C(40) | -3330(4) | 1452(4)  | 5270(2) | 35(1) |
| C(21) | -2128(4) | 429(4)   | 234(2)  | 34(1) |
| C(39) | -2551(5) | 477(4)   | 4796(2) | 40(1) |
| C(35) | -4611(4) | 6789(4)  | 3195(2) | 40(1) |
| B(1)  | 1571(4)  | 1670(4)  | 2523(2) | 21(1) |
| C(33) | -2553(5) | 7467(4)  | 3430(2) | 45(1) |

---

Table S9. Bond lengths [ $\text{\AA}$ ] and angles [ $^\circ$ ] for **3b**.

---

|             |            |
|-------------|------------|
| Br(1)-Fe(1) | 2.3388(6)  |
| Fe(1)-C(1)  | 2.193(3)   |
| Fe(1)-B(1)  | 2.330(4)   |
| Fe(1)-P(1)  | 2.3460(10) |
| Fe(1)-P(2)  | 2.3499(10) |
| Fe(1)-C(2)  | 2.692(4)   |
| Fe(1)-C(6)  | 2.712(3)   |
| P(1)-C(7)   | 1.812(3)   |
| P(1)-C(13)  | 1.817(3)   |
| P(1)-C(19)  | 1.834(3)   |
| P(2)-C(25)  | 1.813(4)   |
| P(2)-C(31)  | 1.820(4)   |
| P(2)-C(37)  | 1.830(3)   |
| C(13)-C(18) | 1.382(5)   |
| C(13)-C(14) | 1.387(5)   |
| C(31)-C(32) | 1.385(5)   |
| C(31)-C(36) | 1.396(5)   |
| C(1)-C(2)   | 1.402(5)   |
| C(1)-C(6)   | 1.421(5)   |
| C(1)-B(1)   | 1.576(5)   |
| C(7)-C(12)  | 1.405(5)   |
| C(7)-C(8)   | 1.407(5)   |
| C(25)-C(30) | 1.398(5)   |
| C(25)-C(26) | 1.410(4)   |
| C(8)-C(9)   | 1.399(5)   |
| C(8)-B(1)   | 1.610(5)   |
| C(27)-C(28) | 1.383(5)   |
| C(27)-C(26) | 1.403(5)   |
| C(27)-H(27) | 0.9500     |
| C(18)-C(17) | 1.399(5)   |
| C(18)-H(18) | 0.9500     |
| C(30)-C(29) | 1.376(5)   |
| C(30)-H(30) | 0.9500     |
| C(14)-C(15) | 1.399(5)   |

|             |          |
|-------------|----------|
| C(14)-H(14) | 0.9500   |
| C(32)-C(33) | 1.399(5) |
| C(32)-H(32) | 0.9500   |
| C(26)-B(1)  | 1.607(5) |
| C(38)-C(37) | 1.386(5) |
| C(38)-C(39) | 1.398(5) |
| C(38)-H(38) | 0.9500   |
| C(15)-C(16) | 1.370(5) |
| C(15)-H(15) | 0.9500   |
| C(20)-C(21) | 1.389(5) |
| C(20)-C(19) | 1.389(5) |
| C(20)-H(20) | 0.9500   |
| C(12)-C(11) | 1.379(5) |
| C(12)-H(12) | 0.9500   |
| C(5)-C(4)   | 1.377(5) |
| C(5)-C(6)   | 1.379(5) |
| C(5)-H(5)   | 1.00(3)  |
| C(9)-C(10)  | 1.389(5) |
| C(9)-H(9)   | 0.9500   |
| C(6)-H(6)   | 0.99(3)  |
| C(28)-C(29) | 1.383(5) |
| C(28)-H(28) | 0.9500   |
| C(10)-C(11) | 1.394(5) |
| C(10)-H(10) | 0.9500   |
| C(19)-C(24) | 1.390(5) |
| C(2)-C(3)   | 1.384(5) |
| C(2)-H(2)   | 0.87(3)  |
| C(17)-C(16) | 1.369(6) |
| C(17)-H(17) | 0.9500   |
| C(42)-C(41) | 1.369(5) |
| C(42)-C(37) | 1.408(4) |
| C(42)-H(42) | 0.9500   |
| C(36)-C(35) | 1.387(5) |
| C(36)-H(36) | 0.9500   |
| C(3)-C(4)   | 1.369(5) |
| C(3)-H(3)   | 0.76(4)  |

|                  |            |
|------------------|------------|
| C(24)-C(23)      | 1.374(5)   |
| C(24)-H(24)      | 0.9500     |
| C(16)-H(16)      | 0.9500     |
| C(41)-C(40)      | 1.371(5)   |
| C(41)-H(41)      | 0.9500     |
| C(4)-H(4)        | 0.95(4)    |
| C(29)-H(29)      | 0.9500     |
| C(22)-C(23)      | 1.371(6)   |
| C(22)-C(21)      | 1.372(5)   |
| C(22)-H(22)      | 0.9500     |
| C(23)-H(23)      | 0.9500     |
| C(34)-C(35)      | 1.365(6)   |
| C(34)-C(33)      | 1.374(6)   |
| C(34)-H(34)      | 0.9500     |
| C(11)-H(11)      | 0.9500     |
| C(40)-C(39)      | 1.373(5)   |
| C(40)-H(40)      | 0.9500     |
| C(21)-H(21)      | 0.9500     |
| C(39)-H(39)      | 0.9500     |
| C(35)-H(35)      | 0.9500     |
| C(33)-H(33)      | 0.9500     |
|                  |            |
| C(1)-Fe(1)-B(1)  | 40.64(13)  |
| C(1)-Fe(1)-Br(1) | 125.74(9)  |
| B(1)-Fe(1)-Br(1) | 166.36(10) |
| C(1)-Fe(1)-P(1)  | 104.04(9)  |
| B(1)-Fe(1)-P(1)  | 80.20(10)  |
| Br(1)-Fe(1)-P(1) | 106.78(3)  |
| C(1)-Fe(1)-P(2)  | 102.46(9)  |
| B(1)-Fe(1)-P(2)  | 80.60(9)   |
| Br(1)-Fe(1)-P(2) | 107.03(3)  |
| P(1)-Fe(1)-P(2)  | 110.33(4)  |
| C(1)-Fe(1)-C(2)  | 31.28(11)  |
| B(1)-Fe(1)-C(2)  | 62.28(13)  |
| Br(1)-Fe(1)-C(2) | 106.06(8)  |
| P(1)-Fe(1)-C(2)  | 135.30(8)  |

|                   |            |
|-------------------|------------|
| P(2)-Fe(1)-C(2)   | 87.74(9)   |
| C(1)-Fe(1)-C(6)   | 31.48(11)  |
| B(1)-Fe(1)-C(6)   | 62.00(12)  |
| Br(1)-Fe(1)-C(6)  | 105.70(8)  |
| P(1)-Fe(1)-C(6)   | 89.85(8)   |
| P(2)-Fe(1)-C(6)   | 133.94(8)  |
| C(2)-Fe(1)-C(6)   | 52.31(11)  |
| C(7)-P(1)-C(13)   | 105.81(16) |
| C(7)-P(1)-C(19)   | 106.05(14) |
| C(13)-P(1)-C(19)  | 102.14(15) |
| C(7)-P(1)-Fe(1)   | 107.58(11) |
| C(13)-P(1)-Fe(1)  | 119.41(11) |
| C(19)-P(1)-Fe(1)  | 114.82(11) |
| C(25)-P(2)-C(31)  | 105.85(16) |
| C(25)-P(2)-C(37)  | 106.53(15) |
| C(31)-P(2)-C(37)  | 101.08(15) |
| C(25)-P(2)-Fe(1)  | 107.66(11) |
| C(31)-P(2)-Fe(1)  | 119.58(11) |
| C(37)-P(2)-Fe(1)  | 115.12(11) |
| C(18)-C(13)-C(14) | 119.6(3)   |
| C(18)-C(13)-P(1)  | 121.7(3)   |
| C(14)-C(13)-P(1)  | 118.7(3)   |
| C(32)-C(31)-C(36) | 119.8(3)   |
| C(32)-C(31)-P(2)  | 122.4(3)   |
| C(36)-C(31)-P(2)  | 117.8(3)   |
| C(2)-C(1)-C(6)    | 115.1(3)   |
| C(2)-C(1)-B(1)    | 122.8(3)   |
| C(6)-C(1)-B(1)    | 121.6(3)   |
| C(2)-C(1)-Fe(1)   | 94.4(2)    |
| C(6)-C(1)-Fe(1)   | 94.9(2)    |
| B(1)-C(1)-Fe(1)   | 74.36(18)  |
| C(12)-C(7)-C(8)   | 122.1(3)   |
| C(12)-C(7)-P(1)   | 123.4(3)   |
| C(8)-C(7)-P(1)    | 114.5(2)   |
| C(30)-C(25)-C(26) | 121.4(3)   |
| C(30)-C(25)-P(2)  | 123.8(3)   |

|                   |           |
|-------------------|-----------|
| C(26)-C(25)-P(2)  | 114.8(2)  |
| C(9)-C(8)-C(7)    | 116.0(3)  |
| C(9)-C(8)-B(1)    | 122.4(3)  |
| C(7)-C(8)-B(1)    | 121.3(3)  |
| C(28)-C(27)-C(26) | 122.4(3)  |
| C(28)-C(27)-H(27) | 118.8     |
| C(26)-C(27)-H(27) | 118.8     |
| C(13)-C(18)-C(17) | 119.5(4)  |
| C(13)-C(18)-H(18) | 120.2     |
| C(17)-C(18)-H(18) | 120.2     |
| C(29)-C(30)-C(25) | 120.4(3)  |
| C(29)-C(30)-H(30) | 119.8     |
| C(25)-C(30)-H(30) | 119.8     |
| C(13)-C(14)-C(15) | 119.6(3)  |
| C(13)-C(14)-H(14) | 120.2     |
| C(15)-C(14)-H(14) | 120.2     |
| C(31)-C(32)-C(33) | 119.5(4)  |
| C(31)-C(32)-H(32) | 120.3     |
| C(33)-C(32)-H(32) | 120.3     |
| C(27)-C(26)-C(25) | 116.0(3)  |
| C(27)-C(26)-B(1)  | 122.4(3)  |
| C(25)-C(26)-B(1)  | 121.4(3)  |
| C(37)-C(38)-C(39) | 120.3(3)  |
| C(37)-C(38)-H(38) | 119.9     |
| C(39)-C(38)-H(38) | 119.9     |
| C(16)-C(15)-C(14) | 120.8(4)  |
| C(16)-C(15)-H(15) | 119.6     |
| C(14)-C(15)-H(15) | 119.6     |
| C(21)-C(20)-C(19) | 120.8(4)  |
| C(21)-C(20)-H(20) | 119.6     |
| C(19)-C(20)-H(20) | 119.6     |
| C(11)-C(12)-C(7)  | 119.9(3)  |
| C(11)-C(12)-H(12) | 120.1     |
| C(7)-C(12)-H(12)  | 120.1     |
| C(4)-C(5)-C(6)    | 121.0(4)  |
| C(4)-C(5)-H(5)    | 125.2(17) |



|                   |           |
|-------------------|-----------|
| C(6)-C(5)-H(5)    | 113.8(17) |
| C(10)-C(9)-C(8)   | 122.5(3)  |
| C(10)-C(9)-H(9)   | 118.8     |
| C(8)-C(9)-H(9)    | 118.8     |
| C(5)-C(6)-C(1)    | 121.7(3)  |
| C(5)-C(6)-Fe(1)   | 115.8(2)  |
| C(1)-C(6)-Fe(1)   | 53.66(16) |
| C(5)-C(6)-H(6)    | 116.2(18) |
| C(1)-C(6)-H(6)    | 122.0(18) |
| Fe(1)-C(6)-H(6)   | 98.7(18)  |
| C(27)-C(28)-C(29) | 120.2(4)  |
| C(27)-C(28)-H(28) | 119.9     |
| C(29)-C(28)-H(28) | 119.9     |
| C(9)-C(10)-C(11)  | 120.1(3)  |
| C(9)-C(10)-H(10)  | 119.9     |
| C(11)-C(10)-H(10) | 119.9     |
| C(20)-C(19)-C(24) | 118.1(3)  |
| C(20)-C(19)-P(1)  | 118.6(3)  |
| C(24)-C(19)-P(1)  | 123.2(3)  |
| C(3)-C(2)-C(1)    | 122.4(4)  |
| C(3)-C(2)-Fe(1)   | 116.0(3)  |
| C(1)-C(2)-Fe(1)   | 54.31(17) |
| C(3)-C(2)-H(2)    | 117(2)    |
| C(1)-C(2)-H(2)    | 120(2)    |
| Fe(1)-C(2)-H(2)   | 106(2)    |
| C(16)-C(17)-C(18) | 121.0(4)  |
| C(16)-C(17)-H(17) | 119.5     |
| C(18)-C(17)-H(17) | 119.5     |
| C(41)-C(42)-C(37) | 120.5(4)  |
| C(41)-C(42)-H(42) | 119.8     |
| C(37)-C(42)-H(42) | 119.8     |
| C(35)-C(36)-C(31) | 119.0(4)  |
| C(35)-C(36)-H(36) | 120.5     |
| C(31)-C(36)-H(36) | 120.5     |
| C(4)-C(3)-C(2)    | 120.8(4)  |
| C(4)-C(3)-H(3)    | 120(3)    |

|                   |          |
|-------------------|----------|
| C(2)-C(3)-H(3)    | 118(3)   |
| C(23)-C(24)-C(19) | 120.8(4) |
| C(23)-C(24)-H(24) | 119.6    |
| C(19)-C(24)-H(24) | 119.6    |
| C(17)-C(16)-C(15) | 119.4(4) |
| C(17)-C(16)-H(16) | 120.3    |
| C(15)-C(16)-H(16) | 120.3    |
| C(42)-C(41)-C(40) | 121.2(3) |
| C(42)-C(41)-H(41) | 119.4    |
| C(40)-C(41)-H(41) | 119.4    |
| C(38)-C(37)-C(42) | 118.2(3) |
| C(38)-C(37)-P(2)  | 119.0(2) |
| C(42)-C(37)-P(2)  | 122.8(3) |
| C(3)-C(4)-C(5)    | 118.9(4) |
| C(3)-C(4)-H(4)    | 117(2)   |
| C(5)-C(4)-H(4)    | 124(2)   |
| C(30)-C(29)-C(28) | 119.5(3) |
| C(30)-C(29)-H(29) | 120.3    |
| C(28)-C(29)-H(29) | 120.3    |
| C(23)-C(22)-C(21) | 120.0(4) |
| C(23)-C(22)-H(22) | 120.0    |
| C(21)-C(22)-H(22) | 120.0    |
| C(22)-C(23)-C(24) | 120.5(4) |
| C(22)-C(23)-H(23) | 119.7    |
| C(24)-C(23)-H(23) | 119.7    |
| C(35)-C(34)-C(33) | 119.5(4) |
| C(35)-C(34)-H(34) | 120.2    |
| C(33)-C(34)-H(34) | 120.2    |
| C(12)-C(11)-C(10) | 119.4(3) |
| C(12)-C(11)-H(11) | 120.3    |
| C(10)-C(11)-H(11) | 120.3    |
| C(41)-C(40)-C(39) | 119.5(3) |
| C(41)-C(40)-H(40) | 120.3    |
| C(39)-C(40)-H(40) | 120.3    |
| C(22)-C(21)-C(20) | 119.8(4) |
| C(22)-C(21)-H(21) | 120.1    |

|                   |           |
|-------------------|-----------|
| C(20)-C(21)-H(21) | 120.1     |
| C(40)-C(39)-C(38) | 120.5(4)  |
| C(40)-C(39)-H(39) | 119.8     |
| C(38)-C(39)-H(39) | 119.8     |
| C(34)-C(35)-C(36) | 121.6(4)  |
| C(34)-C(35)-H(35) | 119.2     |
| C(36)-C(35)-H(35) | 119.2     |
| C(1)-B(1)-C(26)   | 116.7(3)  |
| C(1)-B(1)-C(8)    | 116.5(3)  |
| C(26)-B(1)-C(8)   | 120.6(3)  |
| C(1)-B(1)-Fe(1)   | 65.00(17) |
| C(26)-B(1)-Fe(1)  | 112.6(2)  |
| C(8)-B(1)-Fe(1)   | 112.3(2)  |
| C(34)-C(33)-C(32) | 120.5(4)  |
| C(34)-C(33)-H(33) | 119.7     |
| C(32)-C(33)-H(33) | 119.7     |

---

Symmetry transformations used to generate equivalent atoms:

Table S10. Crystal data and structure refinement for **4**.

|                                   |                                                                                              |                    |
|-----------------------------------|----------------------------------------------------------------------------------------------|--------------------|
| Identification code               | <b>4</b>                                                                                     |                    |
| Empirical formula                 | C <sub>60</sub> H <sub>82</sub> B <sub>2</sub> Fe <sub>2</sub> N <sub>2</sub> P <sub>4</sub> |                    |
| Formula weight                    | 544.24                                                                                       |                    |
| Temperature                       | 100(2) K                                                                                     |                    |
| Wavelength                        | 0.71073 Å                                                                                    |                    |
| Crystal system                    | Monoclinic                                                                                   |                    |
| Space group                       | P2(1)/c                                                                                      |                    |
| Unit cell dimensions              | a = 13.6080(5) Å                                                                             | α = 90°.           |
|                                   | b = 22.6752(7) Å                                                                             | β = 103.3660(10)°. |
|                                   | c = 18.8057(7) Å                                                                             | γ = 90°.           |
| Volume                            | 5645.6(3) Å <sup>3</sup>                                                                     |                    |
| Z                                 | 4                                                                                            |                    |
| Density (calculated)              | 1.281 Mg/m <sup>3</sup>                                                                      |                    |
| Absorption coefficient            | 0.667 mm <sup>-1</sup>                                                                       |                    |
| F(000)                            | 2312                                                                                         |                    |
| Crystal size                      | 0.46 x 0.38 x 0.25 mm <sup>3</sup>                                                           |                    |
| Theta range for data collection   | 1.43 to 46.11°.                                                                              |                    |
| Index ranges                      | -27 ≤ h ≤ 27, -45 ≤ k ≤ 45, -37 ≤ l ≤ 37                                                     |                    |
| Reflections collected             | 485190                                                                                       |                    |
| Independent reflections           | 48836 [R(int) = 0.0684]                                                                      |                    |
| Completeness to theta = 25.00°    | 100.0 %                                                                                      |                    |
| Absorption correction             | None                                                                                         |                    |
| Refinement method                 | Full-matrix least-squares on F <sup>2</sup>                                                  |                    |
| Data / restraints / parameters    | 48836 / 0 / 687                                                                              |                    |
| Goodness-of-fit on F <sup>2</sup> | 1.021                                                                                        |                    |
| Final R indices [I > 2σ(I)]       | R1 = 0.0359, wR2 = 0.0794                                                                    |                    |
| R indices (all data)              | R1 = 0.0667, wR2 = 0.0915                                                                    |                    |
| Largest diff. peak and hole       | 0.967 and -0.335 e.Å <sup>-3</sup>                                                           |                    |

Table S11. Atomic coordinates ( $\times 10^4$ ) and equivalent isotropic displacement parameters ( $\text{\AA}^2 \times 10^3$ ) for **4**.  $U(\text{eq})$  is defined as one third of the trace of the orthogonalized  $U^{\text{ij}}$  tensor.

|        | x        | y       | z       | $U(\text{eq})$ |
|--------|----------|---------|---------|----------------|
| Fe(1)  | 4265(1)  | 2838(1) | 3966(1) | 10(1)          |
| Fe(2)  | 1328(1)  | 3925(1) | 2699(1) | 10(1)          |
| P(3)   | 1296(1)  | 4919(1) | 3035(1) | 11(1)          |
| P(1)   | 5731(1)  | 3206(1) | 3704(1) | 11(1)          |
| P(2)   | 4201(1)  | 1821(1) | 3655(1) | 12(1)          |
| P(4)   | 1210(1)  | 3895(1) | 1439(1) | 11(1)          |
| N(2)   | 2484(1)  | 3531(1) | 3154(1) | 12(1)          |
| N(1)   | 3184(1)  | 3250(1) | 3443(1) | 11(1)          |
| C(1)   | 4818(1)  | 2886(1) | 5189(1) | 13(1)          |
| C(101) | -170(1)  | 3593(1) | 2784(1) | 13(1)          |
| C(120) | -772(1)  | 4107(1) | 1448(1) | 13(1)          |
| C(6)   | 5188(1)  | 3425(1) | 5546(1) | 16(1)          |
| C(16)  | 6109(1)  | 2853(1) | 2908(1) | 14(1)          |
| C(2)   | 3754(1)  | 2804(1) | 5033(1) | 14(1)          |
| C(119) | -128(1)  | 3938(1) | 991(1)  | 14(1)          |
| C(20)  | 5242(1)  | 1748(1) | 5058(1) | 13(1)          |
| C(7)   | 6814(1)  | 3064(1) | 4464(1) | 13(1)          |
| C(11)  | 8524(1)  | 3223(1) | 5162(1) | 20(1)          |
| C(28)  | 5045(1)  | 1444(1) | 3132(1) | 15(1)          |
| C(19)  | 4541(1)  | 1435(1) | 4523(1) | 14(1)          |
| C(107) | 49(1)    | 5073(1) | 3185(1) | 13(1)          |
| C(125) | 1791(1)  | 4527(1) | 1048(1) | 16(1)          |
| C(30)  | 6124(1)  | 1390(1) | 3603(1) | 18(1)          |
| C(121) | -1806(1) | 4167(1) | 1109(1) | 16(1)          |
| C(18)  | 5209(1)  | 2792(1) | 2249(1) | 17(1)          |
| C(5)   | 4561(1)  | 3817(1) | 5787(1) | 20(1)          |
| C(17)  | 7027(1)  | 3122(1) | 2684(1) | 22(1)          |
| C(23)  | 4594(1)  | 596(1)  | 5324(1) | 21(1)          |
| C(109) | -1702(1) | 4810(1) | 2820(1) | 18(1)          |
| C(3)   | 3110(1)  | 3224(1) | 5251(1) | 19(1)          |
| C(108) | -702(1)  | 4714(1) | 2758(1) | 13(1)          |

|        |          |         |         |       |
|--------|----------|---------|---------|-------|
| C(122) | -2185(1) | 4046(1) | 372(1)  | 18(1) |
| C(10)  | 8370(1)  | 2807(1) | 5667(1) | 20(1) |
| C(8)   | 6636(1)  | 2647(1) | 4977(1) | 13(1) |
| B(2)   | -359(1)  | 4176(1) | 2313(1) | 13(1) |
| C(116) | 2180(1)  | 5115(1) | 3910(1) | 16(1) |
| C(130) | 1068(1)  | 2687(1) | 1101(1) | 20(1) |
| C(15)  | 5015(1)  | 4217(1) | 2892(1) | 20(1) |
| C(129) | 2803(1)  | 3152(1) | 1322(1) | 18(1) |
| C(128) | 1669(1)  | 3242(1) | 1007(1) | 14(1) |
| C(9)   | 7448(1)  | 2517(1) | 5571(1) | 18(1) |
| C(14)  | 5775(1)  | 4353(1) | 4233(1) | 22(1) |
| C(24)  | 4209(1)  | 868(1)  | 4654(1) | 18(1) |
| C(102) | 113(1)   | 3607(1) | 3558(1) | 18(1) |
| C(124) | -514(1)  | 3807(1) | 250(1)  | 18(1) |
| C(106) | -230(1)  | 3026(1) | 2460(1) | 18(1) |
| C(113) | 1438(1)  | 5548(1) | 2411(1) | 17(1) |
| C(4)   | 3509(1)  | 3716(1) | 5635(1) | 20(1) |
| B(1)   | 5512(1)  | 2422(1) | 4930(1) | 13(1) |
| C(12)  | 7750(1)  | 3350(1) | 4557(1) | 18(1) |
| C(13)  | 5838(1)  | 4011(1) | 3545(1) | 16(1) |
| C(112) | -178(1)  | 5507(1) | 3654(1) | 18(1) |
| C(25)  | 2930(1)  | 1539(1) | 3213(1) | 20(1) |
| C(123) | -1540(1) | 3858(1) | -60(1)  | 19(1) |
| C(127) | 2868(1)  | 4654(1) | 1491(1) | 20(1) |
| C(110) | -1933(1) | 5238(1) | 3286(1) | 21(1) |
| C(104) | 128(1)   | 2544(1) | 3636(1) | 27(1) |
| C(126) | 1766(1)  | 4484(1) | 232(1)  | 25(1) |
| C(118) | 3265(1)  | 5016(1) | 3836(1) | 26(1) |
| C(111) | -1174(1) | 5589(1) | 3705(1) | 21(1) |
| C(117) | 1963(1)  | 4742(1) | 4534(1) | 24(1) |
| C(27)  | 2596(1)  | 1805(1) | 2447(1) | 28(1) |
| C(21)  | 5629(1)  | 1453(1) | 5723(1) | 17(1) |
| C(115) | 454(1)   | 5639(1) | 1828(1) | 22(1) |
| C(105) | -101(1)  | 2513(1) | 2875(1) | 26(1) |
| C(103) | 254(1)   | 3090(1) | 3974(1) | 23(1) |
| C(29)  | 4692(1)  | 831(1)  | 2836(1) | 23(1) |

|        |         |         |         |       |
|--------|---------|---------|---------|-------|
| C(114) | 1765(1) | 6136(1) | 2798(1) | 27(1) |
| C(22)  | 5315(1) | 887(1)  | 5852(1) | 21(1) |
| C(26)  | 2178(1) | 1699(1) | 3675(1) | 28(1) |

---

Table S12. Bond lengths [ $\text{\AA}$ ] and angles [ $^\circ$ ] for **4**.

---

|               |            |
|---------------|------------|
| Fe(1)-N(1)    | 1.8261(5)  |
| Fe(1)-C(1)    | 2.2517(6)  |
| Fe(1)-C(2)    | 2.2715(7)  |
| Fe(1)-P(1)    | 2.3182(2)  |
| Fe(1)-B(1)    | 2.3740(7)  |
| Fe(1)-P(2)    | 2.3749(2)  |
| Fe(2)-N(2)    | 1.8382(6)  |
| Fe(2)-C(101)  | 2.2134(6)  |
| Fe(2)-B(2)    | 2.3134(7)  |
| Fe(2)-P(4)    | 2.3381(2)  |
| Fe(2)-P(3)    | 2.3439(2)  |
| Fe(2)-C(102)  | 2.6645(7)  |
| P(3)-C(107)   | 1.8175(7)  |
| P(3)-C(116)   | 1.8549(7)  |
| P(3)-C(113)   | 1.8859(7)  |
| P(1)-C(7)     | 1.8282(7)  |
| P(1)-C(13)    | 1.8608(7)  |
| P(1)-C(16)    | 1.8714(7)  |
| P(2)-C(19)    | 1.8151(7)  |
| P(2)-C(25)    | 1.8503(8)  |
| P(2)-C(28)    | 1.8819(7)  |
| P(4)-C(119)   | 1.8238(7)  |
| P(4)-C(128)   | 1.8650(7)  |
| P(4)-C(125)   | 1.8676(7)  |
| N(2)-N(1)     | 1.1705(8)  |
| C(1)-C(2)     | 1.4211(10) |
| C(1)-C(6)     | 1.4303(10) |
| C(1)-B(1)     | 1.5627(9)  |
| C(101)-C(106) | 1.4167(10) |
| C(101)-C(102) | 1.4184(10) |
| C(101)-B(2)   | 1.5789(10) |
| C(120)-C(121) | 1.4103(9)  |
| C(120)-C(119) | 1.4141(9)  |
| C(120)-B(2)   | 1.6022(10) |



|               |            |
|---------------|------------|
| C(6)-C(5)     | 1.3785(10) |
| C(6)-H(6)     | 0.952(13)  |
| C(16)-C(17)   | 1.5330(10) |
| C(16)-C(18)   | 1.5340(10) |
| C(16)-H(16)   | 1.0000     |
| C(2)-C(3)     | 1.4185(10) |
| C(2)-H(2)     | 0.937(13)  |
| C(119)-C(124) | 1.4040(10) |
| C(20)-C(19)   | 1.4068(10) |
| C(20)-C(21)   | 1.4081(9)  |
| C(20)-B(1)    | 1.6039(10) |
| C(7)-C(12)    | 1.4045(10) |
| C(7)-C(8)     | 1.4103(10) |
| C(11)-C(10)   | 1.3883(13) |
| C(11)-C(12)   | 1.3905(11) |
| C(11)-H(11)   | 0.9500     |
| C(28)-C(29)   | 1.5319(10) |
| C(28)-C(30)   | 1.5342(10) |
| C(28)-H(28)   | 1.0000     |
| C(19)-C(24)   | 1.4034(10) |
| C(107)-C(112) | 1.4017(9)  |
| C(107)-C(108) | 1.4063(10) |
| C(125)-C(126) | 1.5303(11) |
| C(125)-C(127) | 1.5368(11) |
| C(125)-H(125) | 1.0000     |
| C(30)-H(30A)  | 0.9800     |
| C(30)-H(30B)  | 0.9800     |
| C(30)-H(30C)  | 0.9800     |
| C(121)-C(122) | 1.3899(10) |
| C(121)-H(121) | 0.9500     |
| C(18)-H(18A)  | 0.9800     |
| C(18)-H(18B)  | 0.9800     |
| C(18)-H(18C)  | 0.9800     |
| C(5)-C(4)     | 1.4124(12) |
| C(5)-H(5)     | 0.948(14)  |
| C(17)-H(17A)  | 0.9800     |

|               |            |
|---------------|------------|
| C(17)-H(17B)  | 0.9800     |
| C(17)-H(17C)  | 0.9800     |
| C(23)-C(22)   | 1.3894(13) |
| C(23)-C(24)   | 1.3924(11) |
| C(23)-H(23)   | 0.9500     |
| C(109)-C(110) | 1.3922(11) |
| C(109)-C(108) | 1.4088(9)  |
| C(109)-H(109) | 0.9500     |
| C(3)-C(4)     | 1.3711(12) |
| C(3)-H(3)     | 0.984(13)  |
| C(108)-B(2)   | 1.6071(10) |
| C(122)-C(123) | 1.3947(11) |
| C(122)-H(122) | 0.9500     |
| C(10)-C(9)    | 1.3909(11) |
| C(10)-H(10)   | 0.9500     |
| C(8)-C(9)     | 1.4090(10) |
| C(8)-B(1)     | 1.5960(10) |
| C(116)-C(117) | 1.5295(12) |
| C(116)-C(118) | 1.5312(11) |
| C(116)-H(116) | 1.0000     |
| C(130)-C(128) | 1.5319(10) |
| C(130)-H(13A) | 0.9800     |
| C(130)-H(13B) | 0.9800     |
| C(130)-H(13C) | 0.9800     |
| C(15)-C(13)   | 1.5320(11) |
| C(15)-H(15A)  | 0.9800     |
| C(15)-H(15B)  | 0.9800     |
| C(15)-H(15C)  | 0.9800     |
| C(129)-C(128) | 1.5335(10) |
| C(129)-H(12A) | 0.9800     |
| C(129)-H(12B) | 0.9800     |
| C(129)-H(12C) | 0.9800     |
| C(128)-H(128) | 1.0000     |
| C(9)-H(9)     | 0.9500     |
| C(14)-C(13)   | 1.5278(11) |
| C(14)-H(14A)  | 0.9800     |

|               |            |
|---------------|------------|
| C(14)-H(14B)  | 0.9800     |
| C(14)-H(14C)  | 0.9800     |
| C(24)-H(24)   | 0.9500     |
| C(102)-C(103) | 1.3987(11) |
| C(102)-H(102) | 0.959(12)  |
| C(124)-C(123) | 1.3878(10) |
| C(124)-H(124) | 0.9500     |
| C(106)-C(105) | 1.3890(12) |
| C(106)-H(106) | 0.952(13)  |
| C(113)-C(114) | 1.5355(11) |
| C(113)-C(115) | 1.5365(12) |
| C(113)-H(113) | 1.0000     |
| C(4)-H(4)     | 0.958(13)  |
| C(12)-H(12)   | 0.9500     |
| C(13)-H(13)   | 1.0000     |
| C(112)-C(111) | 1.3920(11) |
| C(112)-H(112) | 0.9500     |
| C(25)-C(27)   | 1.5299(12) |
| C(25)-C(26)   | 1.5304(13) |
| C(25)-H(25)   | 1.0000     |
| C(123)-H(123) | 0.9500     |
| C(127)-H(12D) | 0.9800     |
| C(127)-H(12E) | 0.9800     |
| C(127)-H(12F) | 0.9800     |
| C(110)-C(111) | 1.3934(12) |
| C(110)-H(110) | 0.9500     |
| C(104)-C(103) | 1.3839(14) |
| C(104)-C(105) | 1.3944(15) |
| C(104)-H(104) | 0.948(15)  |
| C(126)-H(12G) | 0.9800     |
| C(126)-H(12H) | 0.9800     |
| C(126)-H(12I) | 0.9800     |
| C(118)-H(11A) | 0.9800     |
| C(118)-H(11B) | 0.9800     |
| C(118)-H(11C) | 0.9800     |
| C(111)-H(111) | 0.9500     |

|                 |             |
|-----------------|-------------|
| C(117)-H(11D)   | 0.9800      |
| C(117)-H(11E)   | 0.9800      |
| C(117)-H(11F)   | 0.9800      |
| C(27)-H(27A)    | 0.9800      |
| C(27)-H(27B)    | 0.9800      |
| C(27)-H(27C)    | 0.9800      |
| C(21)-C(22)     | 1.3932(11)  |
| C(21)-H(21)     | 0.9500      |
| C(115)-H(11G)   | 0.9800      |
| C(115)-H(11H)   | 0.9800      |
| C(115)-H(11I)   | 0.9800      |
| C(105)-H(105)   | 0.960(15)   |
| C(103)-H(103)   | 0.946(14)   |
| C(29)-H(29A)    | 0.9800      |
| C(29)-H(29B)    | 0.9800      |
| C(29)-H(29C)    | 0.9800      |
| C(114)-H(11J)   | 0.9800      |
| C(114)-H(11K)   | 0.9800      |
| C(114)-H(11L)   | 0.9800      |
| C(22)-H(22)     | 0.9500      |
| C(26)-H(26A)    | 0.9800      |
| C(26)-H(26B)    | 0.9800      |
| C(26)-H(26C)    | 0.9800      |
|                 |             |
| N(1)-Fe(1)-C(1) | 124.27(2)   |
| N(1)-Fe(1)-C(2) | 96.92(2)    |
| C(1)-Fe(1)-C(2) | 36.62(2)    |
| N(1)-Fe(1)-P(1) | 109.090(18) |
| C(1)-Fe(1)-P(1) | 95.653(18)  |
| C(2)-Fe(1)-P(1) | 130.817(19) |
| N(1)-Fe(1)-B(1) | 163.55(2)   |
| C(1)-Fe(1)-B(1) | 39.38(2)    |
| C(2)-Fe(1)-B(1) | 67.78(2)    |
| P(1)-Fe(1)-B(1) | 78.862(19)  |
| N(1)-Fe(1)-P(2) | 112.661(18) |
| C(1)-Fe(1)-P(2) | 106.409(17) |

|                     |             |
|---------------------|-------------|
| C(2)-Fe(1)-P(2)     | 100.549(18) |
| P(1)-Fe(1)-P(2)     | 106.358(7)  |
| B(1)-Fe(1)-P(2)     | 77.396(18)  |
| N(2)-Fe(2)-C(101)   | 120.30(2)   |
| N(2)-Fe(2)-B(2)     | 161.03(3)   |
| C(101)-Fe(2)-B(2)   | 40.75(3)    |
| N(2)-Fe(2)-P(4)     | 107.994(18) |
| C(101)-Fe(2)-P(4)   | 102.389(18) |
| B(2)-Fe(2)-P(4)     | 81.894(19)  |
| N(2)-Fe(2)-P(3)     | 114.095(18) |
| C(101)-Fe(2)-P(3)   | 103.441(18) |
| B(2)-Fe(2)-P(3)     | 76.606(19)  |
| P(4)-Fe(2)-P(3)     | 107.461(7)  |
| N(2)-Fe(2)-C(102)   | 99.82(2)    |
| C(101)-Fe(2)-C(102) | 32.15(2)    |
| B(2)-Fe(2)-C(102)   | 63.03(2)    |
| P(4)-Fe(2)-C(102)   | 134.419(18) |
| P(3)-Fe(2)-C(102)   | 92.452(18)  |
| C(107)-P(3)-C(116)  | 104.68(3)   |
| C(107)-P(3)-C(113)  | 100.64(3)   |
| C(116)-P(3)-C(113)  | 103.42(3)   |
| C(107)-P(3)-Fe(2)   | 107.71(2)   |
| C(116)-P(3)-Fe(2)   | 114.92(2)   |
| C(113)-P(3)-Fe(2)   | 123.23(2)   |
| C(7)-P(1)-C(13)     | 102.70(3)   |
| C(7)-P(1)-C(16)     | 103.28(3)   |
| C(13)-P(1)-C(16)    | 104.16(3)   |
| C(7)-P(1)-Fe(1)     | 110.39(2)   |
| C(13)-P(1)-Fe(1)    | 119.32(2)   |
| C(16)-P(1)-Fe(1)    | 115.16(2)   |
| C(19)-P(2)-C(25)    | 104.80(4)   |
| C(19)-P(2)-C(28)    | 100.97(3)   |
| C(25)-P(2)-C(28)    | 103.19(4)   |
| C(19)-P(2)-Fe(1)    | 105.03(2)   |
| C(25)-P(2)-Fe(1)    | 115.04(3)   |
| C(28)-P(2)-Fe(1)    | 125.31(2)   |

|                      |           |
|----------------------|-----------|
| C(119)-P(4)-C(128)   | 103.90(3) |
| C(119)-P(4)-C(125)   | 104.20(3) |
| C(128)-P(4)-C(125)   | 102.92(3) |
| C(119)-P(4)-Fe(2)    | 107.06(2) |
| C(128)-P(4)-Fe(2)    | 120.85(2) |
| C(125)-P(4)-Fe(2)    | 116.15(2) |
| N(1)-N(2)-Fe(2)      | 175.85(5) |
| N(2)-N(1)-Fe(1)      | 175.21(5) |
| C(2)-C(1)-C(6)       | 116.07(6) |
| C(2)-C(1)-B(1)       | 120.51(6) |
| C(6)-C(1)-B(1)       | 123.29(6) |
| C(2)-C(1)-Fe(1)      | 72.45(4)  |
| C(6)-C(1)-Fe(1)      | 121.29(5) |
| B(1)-C(1)-Fe(1)      | 74.54(4)  |
| C(106)-C(101)-C(102) | 115.94(6) |
| C(106)-C(101)-B(2)   | 122.29(6) |
| C(102)-C(101)-B(2)   | 121.71(6) |
| C(106)-C(101)-Fe(2)  | 103.90(5) |
| C(102)-C(101)-Fe(2)  | 91.72(4)  |
| B(2)-C(101)-Fe(2)    | 73.03(4)  |
| C(121)-C(120)-C(119) | 116.48(6) |
| C(121)-C(120)-B(2)   | 121.90(6) |
| C(119)-C(120)-B(2)   | 121.45(6) |
| C(5)-C(6)-C(1)       | 121.90(7) |
| C(5)-C(6)-H(6)       | 120.0(8)  |
| C(1)-C(6)-H(6)       | 118.0(8)  |
| C(17)-C(16)-C(18)    | 111.33(6) |
| C(17)-C(16)-P(1)     | 116.19(5) |
| C(18)-C(16)-P(1)     | 111.68(5) |
| C(17)-C(16)-H(16)    | 105.6     |
| C(18)-C(16)-H(16)    | 105.6     |
| P(1)-C(16)-H(16)     | 105.6     |
| C(3)-C(2)-C(1)       | 121.42(7) |
| C(3)-C(2)-Fe(1)      | 124.66(5) |
| C(1)-C(2)-Fe(1)      | 70.93(4)  |
| C(3)-C(2)-H(2)       | 118.3(8)  |

|                      |           |
|----------------------|-----------|
| C(1)-C(2)-H(2)       | 119.3(8)  |
| Fe(1)-C(2)-H(2)      | 84.6(8)   |
| C(124)-C(119)-C(120) | 121.25(6) |
| C(124)-C(119)-P(4)   | 123.44(5) |
| C(120)-C(119)-P(4)   | 115.30(5) |
| C(19)-C(20)-C(21)    | 116.73(6) |
| C(19)-C(20)-B(1)     | 120.89(6) |
| C(21)-C(20)-B(1)     | 122.21(6) |
| C(12)-C(7)-C(8)      | 121.24(6) |
| C(12)-C(7)-P(1)      | 124.04(5) |
| C(8)-C(7)-P(1)       | 114.70(5) |
| C(10)-C(11)-C(12)    | 119.71(7) |
| C(10)-C(11)-H(11)    | 120.1     |
| C(12)-C(11)-H(11)    | 120.1     |
| C(29)-C(28)-C(30)    | 108.46(6) |
| C(29)-C(28)-P(2)     | 115.13(6) |
| C(30)-C(28)-P(2)     | 110.68(5) |
| C(29)-C(28)-H(28)    | 107.4     |
| C(30)-C(28)-H(28)    | 107.4     |
| P(2)-C(28)-H(28)     | 107.4     |
| C(24)-C(19)-C(20)    | 121.87(6) |
| C(24)-C(19)-P(2)     | 125.00(6) |
| C(20)-C(19)-P(2)     | 113.01(5) |
| C(112)-C(107)-C(108) | 121.98(6) |
| C(112)-C(107)-P(3)   | 125.64(5) |
| C(108)-C(107)-P(3)   | 112.36(5) |
| C(126)-C(125)-C(127) | 110.66(6) |
| C(126)-C(125)-P(4)   | 115.64(5) |
| C(127)-C(125)-P(4)   | 111.55(5) |
| C(126)-C(125)-H(125) | 106.1     |
| C(127)-C(125)-H(125) | 106.1     |
| P(4)-C(125)-H(125)   | 106.1     |
| C(28)-C(30)-H(30A)   | 109.5     |
| C(28)-C(30)-H(30B)   | 109.5     |
| H(30A)-C(30)-H(30B)  | 109.5     |
| C(28)-C(30)-H(30C)   | 109.5     |

|                      |           |
|----------------------|-----------|
| H(30A)-C(30)-H(30C)  | 109.5     |
| H(30B)-C(30)-H(30C)  | 109.5     |
| C(122)-C(121)-C(120) | 122.13(6) |
| C(122)-C(121)-H(121) | 118.9     |
| C(120)-C(121)-H(121) | 118.9     |
| C(16)-C(18)-H(18A)   | 109.5     |
| C(16)-C(18)-H(18B)   | 109.5     |
| H(18A)-C(18)-H(18B)  | 109.5     |
| C(16)-C(18)-H(18C)   | 109.5     |
| H(18A)-C(18)-H(18C)  | 109.5     |
| H(18B)-C(18)-H(18C)  | 109.5     |
| C(6)-C(5)-C(4)       | 120.29(7) |
| C(6)-C(5)-H(5)       | 120.2(8)  |
| C(4)-C(5)-H(5)       | 119.5(8)  |
| C(16)-C(17)-H(17A)   | 109.5     |
| C(16)-C(17)-H(17B)   | 109.5     |
| H(17A)-C(17)-H(17B)  | 109.5     |
| C(16)-C(17)-H(17C)   | 109.5     |
| H(17A)-C(17)-H(17C)  | 109.5     |
| H(17B)-C(17)-H(17C)  | 109.5     |
| C(22)-C(23)-C(24)    | 119.49(7) |
| C(22)-C(23)-H(23)    | 120.3     |
| C(24)-C(23)-H(23)    | 120.3     |
| C(110)-C(109)-C(108) | 121.54(7) |
| C(110)-C(109)-H(109) | 119.2     |
| C(108)-C(109)-H(109) | 119.2     |
| C(4)-C(3)-C(2)       | 120.16(7) |
| C(4)-C(3)-H(3)       | 121.3(8)  |
| C(2)-C(3)-H(3)       | 118.5(8)  |
| C(107)-C(108)-C(109) | 116.80(6) |
| C(107)-C(108)-B(2)   | 118.48(5) |
| C(109)-C(108)-B(2)   | 124.28(6) |
| C(121)-C(122)-C(123) | 120.29(7) |
| C(121)-C(122)-H(122) | 119.9     |
| C(123)-C(122)-H(122) | 119.9     |
| C(11)-C(10)-C(9)     | 120.42(7) |



|                      |           |
|----------------------|-----------|
| C(11)-C(10)-H(10)    | 119.8     |
| C(9)-C(10)-H(10)     | 119.8     |
| C(9)-C(8)-C(7)       | 117.11(6) |
| C(9)-C(8)-B(1)       | 122.84(6) |
| C(7)-C(8)-B(1)       | 119.39(6) |
| C(101)-B(2)-C(120)   | 117.41(6) |
| C(101)-B(2)-C(108)   | 111.94(5) |
| C(120)-B(2)-C(108)   | 121.76(6) |
| C(101)-B(2)-Fe(2)    | 66.22(3)  |
| C(120)-B(2)-Fe(2)    | 112.59(4) |
| C(108)-B(2)-Fe(2)    | 114.26(4) |
| C(117)-C(116)-C(118) | 110.52(7) |
| C(117)-C(116)-P(3)   | 110.33(5) |
| C(118)-C(116)-P(3)   | 108.98(5) |
| C(117)-C(116)-H(116) | 109.0     |
| C(118)-C(116)-H(116) | 109.0     |
| P(3)-C(116)-H(116)   | 109.0     |
| C(128)-C(130)-H(13A) | 109.5     |
| C(128)-C(130)-H(13B) | 109.5     |
| H(13A)-C(130)-H(13B) | 109.5     |
| C(128)-C(130)-H(13C) | 109.5     |
| H(13A)-C(130)-H(13C) | 109.5     |
| H(13B)-C(130)-H(13C) | 109.5     |
| C(13)-C(15)-H(15A)   | 109.5     |
| C(13)-C(15)-H(15B)   | 109.5     |
| H(15A)-C(15)-H(15B)  | 109.5     |
| C(13)-C(15)-H(15C)   | 109.5     |
| H(15A)-C(15)-H(15C)  | 109.5     |
| H(15B)-C(15)-H(15C)  | 109.5     |
| C(128)-C(129)-H(12A) | 109.5     |
| C(128)-C(129)-H(12B) | 109.5     |
| H(12A)-C(129)-H(12B) | 109.5     |
| C(128)-C(129)-H(12C) | 109.5     |
| H(12A)-C(129)-H(12C) | 109.5     |
| H(12B)-C(129)-H(12C) | 109.5     |
| C(130)-C(128)-C(129) | 111.26(6) |

|                      |           |
|----------------------|-----------|
| C(130)-C(128)-P(4)   | 111.12(5) |
| C(129)-C(128)-P(4)   | 110.22(5) |
| C(130)-C(128)-H(128) | 108.0     |
| C(129)-C(128)-H(128) | 108.0     |
| P(4)-C(128)-H(128)   | 108.0     |
| C(10)-C(9)-C(8)      | 121.50(7) |
| C(10)-C(9)-H(9)      | 119.3     |
| C(8)-C(9)-H(9)       | 119.3     |
| C(13)-C(14)-H(14A)   | 109.5     |
| C(13)-C(14)-H(14B)   | 109.5     |
| H(14A)-C(14)-H(14B)  | 109.5     |
| C(13)-C(14)-H(14C)   | 109.5     |
| H(14A)-C(14)-H(14C)  | 109.5     |
| H(14B)-C(14)-H(14C)  | 109.5     |
| C(23)-C(24)-C(19)    | 119.72(8) |
| C(23)-C(24)-H(24)    | 120.1     |
| C(19)-C(24)-H(24)    | 120.1     |
| C(103)-C(102)-C(101) | 121.64(8) |
| C(103)-C(102)-Fe(2)  | 122.86(5) |
| C(101)-C(102)-Fe(2)  | 56.13(4)  |
| C(103)-C(102)-H(102) | 118.1(8)  |
| C(101)-C(102)-H(102) | 120.2(8)  |
| Fe(2)-C(102)-H(102)  | 94.0(8)   |
| C(123)-C(124)-C(119) | 120.55(7) |
| C(123)-C(124)-H(124) | 119.7     |
| C(119)-C(124)-H(124) | 119.7     |
| C(105)-C(106)-C(101) | 122.10(8) |
| C(105)-C(106)-H(106) | 119.8(8)  |
| C(101)-C(106)-H(106) | 117.9(8)  |
| C(114)-C(113)-C(115) | 109.28(7) |
| C(114)-C(113)-P(3)   | 114.92(6) |
| C(115)-C(113)-P(3)   | 110.36(5) |
| C(114)-C(113)-H(113) | 107.3     |
| C(115)-C(113)-H(113) | 107.3     |
| P(3)-C(113)-H(113)   | 107.3     |
| C(3)-C(4)-C(5)       | 119.89(7) |

|                      |           |
|----------------------|-----------|
| C(3)-C(4)-H(4)       | 121.0(8)  |
| C(5)-C(4)-H(4)       | 119.1(8)  |
| C(1)-B(1)-C(8)       | 114.09(6) |
| C(1)-B(1)-C(20)      | 114.80(6) |
| C(8)-B(1)-C(20)      | 123.10(6) |
| C(1)-B(1)-Fe(1)      | 66.09(3)  |
| C(8)-B(1)-Fe(1)      | 114.93(4) |
| C(20)-B(1)-Fe(1)     | 110.20(5) |
| C(11)-C(12)-C(7)     | 119.96(7) |
| C(11)-C(12)-H(12)    | 120.0     |
| C(7)-C(12)-H(12)     | 120.0     |
| C(14)-C(13)-C(15)    | 110.53(6) |
| C(14)-C(13)-P(1)     | 109.96(5) |
| C(15)-C(13)-P(1)     | 111.03(5) |
| C(14)-C(13)-H(13)    | 108.4     |
| C(15)-C(13)-H(13)    | 108.4     |
| P(1)-C(13)-H(13)     | 108.4     |
| C(111)-C(112)-C(107) | 119.73(7) |
| C(111)-C(112)-H(112) | 120.1     |
| C(107)-C(112)-H(112) | 120.1     |
| C(27)-C(25)-C(26)    | 110.42(8) |
| C(27)-C(25)-P(2)     | 109.26(6) |
| C(26)-C(25)-P(2)     | 109.95(6) |
| C(27)-C(25)-H(25)    | 109.1     |
| C(26)-C(25)-H(25)    | 109.1     |
| P(2)-C(25)-H(25)     | 109.1     |
| C(124)-C(123)-C(122) | 119.21(7) |
| C(124)-C(123)-H(123) | 120.4     |
| C(122)-C(123)-H(123) | 120.4     |
| C(125)-C(127)-H(12D) | 109.5     |
| C(125)-C(127)-H(12E) | 109.5     |
| H(12D)-C(127)-H(12E) | 109.5     |
| C(125)-C(127)-H(12F) | 109.5     |
| H(12D)-C(127)-H(12F) | 109.5     |
| H(12E)-C(127)-H(12F) | 109.5     |
| C(109)-C(110)-C(111) | 120.53(7) |

|                      |           |
|----------------------|-----------|
| C(109)-C(110)-H(110) | 119.7     |
| C(111)-C(110)-H(110) | 119.7     |
| C(103)-C(104)-C(105) | 119.52(8) |
| C(103)-C(104)-H(104) | 119.4(9)  |
| C(105)-C(104)-H(104) | 121.0(9)  |
| C(125)-C(126)-H(12G) | 109.5     |
| C(125)-C(126)-H(12H) | 109.5     |
| H(12G)-C(126)-H(12H) | 109.5     |
| C(125)-C(126)-H(12I) | 109.5     |
| H(12G)-C(126)-H(12I) | 109.5     |
| H(12H)-C(126)-H(12I) | 109.5     |
| C(116)-C(118)-H(11A) | 109.5     |
| C(116)-C(118)-H(11B) | 109.5     |
| H(11A)-C(118)-H(11B) | 109.5     |
| C(116)-C(118)-H(11C) | 109.5     |
| H(11A)-C(118)-H(11C) | 109.5     |
| H(11B)-C(118)-H(11C) | 109.5     |
| C(112)-C(111)-C(110) | 119.43(7) |
| C(112)-C(111)-H(111) | 120.3     |
| C(110)-C(111)-H(111) | 120.3     |
| C(116)-C(117)-H(11D) | 109.5     |
| C(116)-C(117)-H(11E) | 109.5     |
| H(11D)-C(117)-H(11E) | 109.5     |
| C(116)-C(117)-H(11F) | 109.5     |
| H(11D)-C(117)-H(11F) | 109.5     |
| H(11E)-C(117)-H(11F) | 109.5     |
| C(25)-C(27)-H(27A)   | 109.5     |
| C(25)-C(27)-H(27B)   | 109.5     |
| H(27A)-C(27)-H(27B)  | 109.5     |
| C(25)-C(27)-H(27C)   | 109.5     |
| H(27A)-C(27)-H(27C)  | 109.5     |
| H(27B)-C(27)-H(27C)  | 109.5     |
| C(22)-C(21)-C(20)    | 121.62(7) |
| C(22)-C(21)-H(21)    | 119.2     |
| C(20)-C(21)-H(21)    | 119.2     |
| C(113)-C(115)-H(11G) | 109.5     |

|                      |           |
|----------------------|-----------|
| C(113)-C(115)-H(11H) | 109.5     |
| H(11G)-C(115)-H(11H) | 109.5     |
| C(113)-C(115)-H(11I) | 109.5     |
| H(11G)-C(115)-H(11I) | 109.5     |
| H(11H)-C(115)-H(11I) | 109.5     |
| C(106)-C(105)-C(104) | 120.18(8) |
| C(106)-C(105)-H(105) | 119.4(9)  |
| C(104)-C(105)-H(105) | 120.3(9)  |
| C(104)-C(103)-C(102) | 120.40(8) |
| C(104)-C(103)-H(103) | 118.6(9)  |
| C(102)-C(103)-H(103) | 120.8(9)  |
| C(28)-C(29)-H(29A)   | 109.5     |
| C(28)-C(29)-H(29B)   | 109.5     |
| H(29A)-C(29)-H(29B)  | 109.5     |
| C(28)-C(29)-H(29C)   | 109.5     |
| H(29A)-C(29)-H(29C)  | 109.5     |
| H(29B)-C(29)-H(29C)  | 109.5     |
| C(113)-C(114)-H(11J) | 109.5     |
| C(113)-C(114)-H(11K) | 109.5     |
| H(11J)-C(114)-H(11K) | 109.5     |
| C(113)-C(114)-H(11L) | 109.5     |
| H(11J)-C(114)-H(11L) | 109.5     |
| H(11K)-C(114)-H(11L) | 109.5     |
| C(23)-C(22)-C(21)    | 120.50(7) |
| C(23)-C(22)-H(22)    | 119.7     |
| C(21)-C(22)-H(22)    | 119.7     |
| C(25)-C(26)-H(26A)   | 109.5     |
| C(25)-C(26)-H(26B)   | 109.5     |
| H(26A)-C(26)-H(26B)  | 109.5     |
| C(25)-C(26)-H(26C)   | 109.5     |
| H(26A)-C(26)-H(26C)  | 109.5     |
| H(26B)-C(26)-H(26C)  | 109.5     |

---

Symmetry transformations used to generate equivalent atoms:

Table S13. Crystal data and structure refinement for **5**.

|                                   |                                             |                              |
|-----------------------------------|---------------------------------------------|------------------------------|
| Identification code               | <b>5</b>                                    |                              |
| Empirical formula                 | C108 H90 B2 Fe2 P4                          |                              |
| Formula weight                    | 1645.00                                     |                              |
| Temperature                       | 100(2) K                                    |                              |
| Wavelength                        | 0.71073 Å                                   |                              |
| Crystal system                    | Triclinic                                   |                              |
| Space group                       | P-1                                         |                              |
| Unit cell dimensions              | a = 9.8333(19) Å                            | $\alpha = 78.661(7)^\circ$ . |
|                                   | b = 11.167(3) Å                             | $\beta = 76.780(5)^\circ$ .  |
|                                   | c = 19.774(3) Å                             | $\gamma = 88.148(8)^\circ$ . |
| Volume                            | 2072.3(7) Å <sup>3</sup>                    |                              |
| Z                                 | 1                                           |                              |
| Density (calculated)              | 1.318 Mg/m <sup>3</sup>                     |                              |
| Absorption coefficient            | 0.479 mm <sup>-1</sup>                      |                              |
| F(000)                            | 860                                         |                              |
| Crystal size                      | 0.32 x 0.30 x 0.19 mm <sup>3</sup>          |                              |
| Theta range for data collection   | 1.08 to 41.29°.                             |                              |
| Index ranges                      | -18<=h<=18, -20<=k<=20, -36<=l<=36          |                              |
| Reflections collected             | 88753                                       |                              |
| Independent reflections           | 25823 [R(int) = 0.0617]                     |                              |
| Completeness to theta = 25.00°    | 100.0 %                                     |                              |
| Absorption correction             | None                                        |                              |
| Refinement method                 | Full-matrix least-squares on F <sup>2</sup> |                              |
| Data / restraints / parameters    | 25823 / 0 / 543                             |                              |
| Goodness-of-fit on F <sup>2</sup> | 0.987                                       |                              |
| Final R indices [I>2sigma(I)]     | R1 = 0.0505, wR2 = 0.1162                   |                              |
| R indices (all data)              | R1 = 0.0929, wR2 = 0.1311                   |                              |
| Largest diff. peak and hole       | 1.331 and -0.473 e.Å <sup>-3</sup>          |                              |

Table S14. Atomic coordinates ( $\times 10^4$ ) and equivalent isotropic displacement parameters ( $\text{\AA}^2 \times 10^3$ ) for **5**.  $U(\text{eq})$  is defined as one third of the trace of the orthogonalized  $U^{\text{ij}}$  tensor.

|       | x        | y        | z       | U(eq) |
|-------|----------|----------|---------|-------|
| Fe(1) | 6220(1)  | -43(1)   | 7986(1) | 8(1)  |
| P(1)  | 6735(1)  | 142(1)   | 6836(1) | 8(1)  |
| P(2)  | 5850(1)  | -2009(1) | 8337(1) | 9(1)  |
| C(27) | 9975(1)  | -2322(1) | 8369(1) | 12(1) |
| C(26) | 8682(1)  | -1866(1) | 8250(1) | 10(1) |
| C(44) | 1071(2)  | 1959(2)  | 8379(1) | 25(1) |
| C(25) | 7526(1)  | -2689(1) | 8470(1) | 10(1) |
| C(24) | 4541(1)  | 1653(1)  | 6568(1) | 14(1) |
| C(5)  | 5334(1)  | 368(1)   | 9023(1) | 12(1) |
| C(35) | 4484(2)  | -4804(1) | 7537(1) | 22(1) |
| C(51) | 10430(2) | -3580(1) | 6334(1) | 28(1) |
| C(48) | 1681(2)  | 3224(1)  | 9123(1) | 23(1) |
| C(52) | 9759(2)  | -4278(1) | 6976(1) | 24(1) |
| C(46) | 1334(1)  | 1064(1)  | 9550(1) | 20(1) |
| C(19) | 6002(1)  | 1558(1)  | 6419(1) | 11(1) |
| C(8)  | 9379(1)  | -24(1)   | 7079(1) | 10(1) |
| C(7)  | 8642(1)  | 306(1)   | 6539(1) | 10(1) |
| B(1)  | 8519(1)  | -476(1)  | 7881(1) | 10(1) |
| C(37) | 4650(1)  | -2444(1) | 9219(1) | 11(1) |
| C(14) | 5545(1)  | -813(1)  | 5851(1) | 13(1) |
| C(28) | 10123(1) | -3519(1) | 8707(1) | 15(1) |
| C(11) | 10792(1) | 724(1)   | 5639(1) | 16(1) |
| C(13) | 6445(1)  | -981(1)  | 6313(1) | 10(1) |
| C(42) | 5096(1)  | -2888(1) | 9839(1) | 14(1) |
| C(47) | 1630(1)  | 2207(1)  | 9657(1) | 19(1) |
| C(1)  | 7798(1)  | 485(1)   | 8319(1) | 10(1) |
| C(54) | 10097(2) | -6091(2) | 6473(1) | 26(1) |
| C(53) | 9589(2)  | -5525(1) | 7048(1) | 24(1) |
| C(4)  | 4903(1)  | 1279(1)  | 8514(1) | 13(1) |
| C(6)  | 6746(1)  | 4(1)     | 8944(1) | 11(1) |
| C(17) | 7010(1)  | -2986(1) | 6033(1) | 17(1) |

|       |          |          |          |       |
|-------|----------|----------|----------|-------|
| C(3)  | 5955(1)  | 1902(1)  | 7961(1)  | 12(1) |
| C(12) | 9341(1)  | 662(1)   | 5826(1)  | 13(1) |
| C(50) | 10926(2) | -4144(2) | 5764(1)  | 38(1) |
| C(34) | 3460(1)  | -4225(1) | 7218(1)  | 18(1) |
| C(38) | 3225(1)  | -2208(1) | 9270(1)  | 16(1) |
| C(18) | 7187(1)  | -2072(1) | 6397(1)  | 13(1) |
| C(49) | 10756(2) | -5394(2) | 5834(1)  | 36(1) |
| C(2)  | 7368(1)  | 1560(1)  | 7878(1)  | 11(1) |
| C(30) | 7678(1)  | -3897(1) | 8819(1)  | 13(1) |
| C(22) | 4700(2)  | 3763(1)  | 5982(1)  | 18(1) |
| C(36) | 5268(1)  | -4169(1) | 7857(1)  | 17(1) |
| C(41) | 4149(2)  | -3082(1) | 10495(1) | 18(1) |
| C(21) | 6144(2)  | 3696(1)  | 5843(1)  | 18(1) |
| C(29) | 8970(1)  | -4306(1) | 8938(1)  | 16(1) |
| C(23) | 3894(1)  | 2735(1)  | 6346(1)  | 17(1) |
| C(9)  | 10850(1) | 34(1)    | 6870(1)  | 14(1) |
| C(15) | 5373(1)  | -1729(1) | 5489(1)  | 17(1) |
| C(39) | 2281(1)  | -2404(1) | 9921(1)  | 21(1) |
| C(45) | 1042(2)  | 941(1)   | 8911(1)  | 23(1) |
| C(31) | 5028(1)  | -2926(1) | 7861(1)  | 11(1) |
| C(16) | 6107(2)  | -2812(1) | 5579(1)  | 18(1) |
| C(43) | 1404(2)  | 3100(1)  | 8483(1)  | 26(1) |
| C(33) | 3219(1)  | -2988(1) | 7212(1)  | 14(1) |
| C(40) | 2744(2)  | -2830(1) | 10538(1) | 21(1) |
| C(32) | 4001(1)  | -2352(1) | 7531(1)  | 12(1) |
| C(10) | 11539(1) | 407(1)   | 6163(1)  | 17(1) |
| C(20) | 6799(1)  | 2600(1)  | 6053(1)  | 14(1) |

---



Table S15. Bond lengths [Å] and angles [°] for **5**.

---

|             |            |
|-------------|------------|
| Fe(1)-C(1)  | 1.9667(11) |
| Fe(1)-C(6)  | 2.0838(12) |
| Fe(1)-C(2)  | 2.0962(12) |
| Fe(1)-C(5)  | 2.1676(11) |
| Fe(1)-C(3)  | 2.1705(12) |
| Fe(1)-P(1)  | 2.1827(5)  |
| Fe(1)-P(2)  | 2.1840(6)  |
| Fe(1)-C(4)  | 2.1934(11) |
| Fe(1)-B(1)  | 2.2668(13) |
| P(1)-C(7)   | 1.8368(12) |
| P(1)-C(19)  | 1.8408(12) |
| P(1)-C(13)  | 1.8417(11) |
| P(2)-C(31)  | 1.8354(12) |
| P(2)-C(25)  | 1.8441(11) |
| P(2)-C(37)  | 1.8533(12) |
| C(27)-C(28) | 1.3916(16) |
| C(27)-C(26) | 1.4071(15) |
| C(27)-H(27) | 0.9500     |
| C(26)-C(25) | 1.4181(16) |
| C(26)-B(1)  | 1.5999(17) |
| C(44)-C(45) | 1.385(2)   |
| C(44)-C(43) | 1.391(2)   |
| C(44)-H(44) | 0.9500     |
| C(25)-C(30) | 1.4096(16) |
| C(24)-C(23) | 1.3888(16) |
| C(24)-C(19) | 1.4037(16) |
| C(24)-H(24) | 0.9500     |
| C(5)-C(4)   | 1.4106(17) |
| C(5)-C(6)   | 1.4171(16) |
| C(5)-H(5)   | 0.907(15)  |
| C(35)-C(34) | 1.3854(19) |
| C(35)-C(36) | 1.3898(19) |
| C(35)-H(35) | 0.9500     |
| C(51)-C(50) | 1.382(2)   |

|             |            |
|-------------|------------|
| C(51)-C(52) | 1.384(2)   |
| C(51)-H(51) | 0.9500     |
| C(48)-C(47) | 1.384(2)   |
| C(48)-C(43) | 1.387(2)   |
| C(48)-H(48) | 0.9500     |
| C(52)-C(53) | 1.384(2)   |
| C(52)-H(52) | 0.9500     |
| C(46)-C(47) | 1.3844(19) |
| C(46)-C(45) | 1.391(2)   |
| C(46)-H(46) | 0.9500     |
| C(19)-C(20) | 1.3996(17) |
| C(8)-C(7)   | 1.4087(16) |
| C(8)-C(9)   | 1.4108(16) |
| C(8)-B(1)   | 1.6070(17) |
| C(7)-C(12)  | 1.4037(16) |
| B(1)-C(1)   | 1.5625(16) |
| C(37)-C(42) | 1.3904(17) |
| C(37)-C(38) | 1.4024(16) |
| C(14)-C(13) | 1.3933(16) |
| C(14)-C(15) | 1.3944(17) |
| C(14)-H(14) | 0.9500     |
| C(28)-C(29) | 1.3909(18) |
| C(28)-H(28) | 0.9500     |
| C(11)-C(10) | 1.3874(19) |
| C(11)-C(12) | 1.3893(17) |
| C(11)-H(11) | 0.9500     |
| C(13)-C(18) | 1.4013(16) |
| C(42)-C(41) | 1.3951(17) |
| C(42)-H(42) | 0.9500     |
| C(47)-H(47) | 0.9500     |
| C(1)-C(6)   | 1.4403(16) |
| C(1)-C(2)   | 1.4513(16) |
| C(1)-C(4)   | 2.9169(17) |
| C(54)-C(49) | 1.375(2)   |
| C(54)-C(53) | 1.394(2)   |
| C(54)-H(54) | 0.9500     |

|             |            |
|-------------|------------|
| C(53)-H(53) | 0.9500     |
| C(4)-C(3)   | 1.4074(17) |
| C(4)-H(4)   | 0.925(17)  |
| C(6)-H(6)   | 1.005(15)  |
| C(17)-C(16) | 1.3838(19) |
| C(17)-C(18) | 1.3948(16) |
| C(17)-H(17) | 0.9500     |
| C(3)-C(2)   | 1.4102(17) |
| C(3)-H(3)   | 0.956(16)  |
| C(12)-H(12) | 0.9500     |
| C(50)-C(49) | 1.388(3)   |
| C(50)-H(50) | 0.9500     |
| C(34)-C(33) | 1.3915(17) |
| C(34)-H(34) | 0.9500     |
| C(38)-C(39) | 1.3876(17) |
| C(38)-H(38) | 0.9500     |
| C(18)-H(18) | 0.9500     |
| C(49)-H(49) | 0.9500     |
| C(2)-H(2)   | 0.899(17)  |
| C(30)-C(29) | 1.3911(17) |
| C(30)-H(30) | 0.9500     |
| C(22)-C(21) | 1.3857(19) |
| C(22)-C(23) | 1.3919(19) |
| C(22)-H(22) | 0.9500     |
| C(36)-C(31) | 1.4012(16) |
| C(36)-H(36) | 0.9500     |
| C(41)-C(40) | 1.388(2)   |
| C(41)-H(41) | 0.9500     |
| C(21)-C(20) | 1.3982(17) |
| C(21)-H(21) | 0.9500     |
| C(29)-H(29) | 0.9500     |
| C(23)-H(23) | 0.9500     |
| C(9)-C(10)  | 1.3943(17) |
| C(9)-H(9)   | 0.9500     |
| C(15)-C(16) | 1.3900(18) |
| C(15)-H(15) | 0.9500     |

|                 |             |
|-----------------|-------------|
| C(39)-C(40)     | 1.389(2)    |
| C(39)-H(39)     | 0.9500      |
| C(45)-H(45)     | 0.9500      |
| C(31)-C(32)     | 1.3978(16)  |
| C(16)-H(16)     | 0.9500      |
| C(43)-H(43)     | 0.9500      |
| C(33)-C(32)     | 1.3875(17)  |
| C(33)-H(33)     | 0.9500      |
| C(40)-H(40)     | 0.9500      |
| C(32)-H(32)     | 0.9500      |
| C(10)-H(10)     | 0.9500      |
| C(20)-H(20)     | 0.9500      |
|                 |             |
| C(1)-Fe(1)-C(6) | 41.53(5)    |
| C(1)-Fe(1)-C(2) | 41.71(5)    |
| C(6)-Fe(1)-C(2) | 70.88(5)    |
| C(1)-Fe(1)-C(5) | 74.12(5)    |
| C(6)-Fe(1)-C(5) | 38.88(4)    |
| C(2)-Fe(1)-C(5) | 81.92(5)    |
| C(1)-Fe(1)-C(3) | 74.18(5)    |
| C(6)-Fe(1)-C(3) | 82.29(4)    |
| C(2)-Fe(1)-C(3) | 38.55(5)    |
| C(5)-Fe(1)-C(3) | 67.34(5)    |
| C(1)-Fe(1)-P(1) | 111.01(4)   |
| C(6)-Fe(1)-P(1) | 152.23(3)   |
| C(2)-Fe(1)-P(1) | 89.47(3)    |
| C(5)-Fe(1)-P(1) | 159.67(3)   |
| C(3)-Fe(1)-P(1) | 94.58(3)    |
| C(1)-Fe(1)-P(2) | 110.90(4)   |
| C(6)-Fe(1)-P(2) | 88.91(3)    |
| C(2)-Fe(1)-P(2) | 152.40(4)   |
| C(5)-Fe(1)-P(2) | 94.16(4)    |
| C(3)-Fe(1)-P(2) | 159.26(3)   |
| P(1)-Fe(1)-P(2) | 101.757(15) |
| C(1)-Fe(1)-C(4) | 88.87(5)    |
| C(6)-Fe(1)-C(4) | 70.45(5)    |

|                   |            |
|-------------------|------------|
| C(2)-Fe(1)-C(4)   | 69.97(5)   |
| C(5)-Fe(1)-C(4)   | 37.74(5)   |
| C(3)-Fe(1)-C(4)   | 37.63(5)   |
| P(1)-Fe(1)-C(4)   | 121.94(4)  |
| P(2)-Fe(1)-C(4)   | 121.64(4)  |
| C(1)-Fe(1)-B(1)   | 42.58(4)   |
| C(6)-Fe(1)-B(1)   | 71.29(5)   |
| C(2)-Fe(1)-B(1)   | 70.00(5)   |
| C(5)-Fe(1)-B(1)   | 110.07(5)  |
| C(3)-Fe(1)-B(1)   | 108.53(5)  |
| P(1)-Fe(1)-B(1)   | 83.80(3)   |
| P(2)-Fe(1)-B(1)   | 86.07(3)   |
| C(4)-Fe(1)-B(1)   | 131.42(5)  |
| C(7)-P(1)-C(19)   | 106.36(5)  |
| C(7)-P(1)-C(13)   | 99.04(5)   |
| C(19)-P(1)-C(13)  | 103.69(5)  |
| C(7)-P(1)-Fe(1)   | 107.29(4)  |
| C(19)-P(1)-Fe(1)  | 110.36(4)  |
| C(13)-P(1)-Fe(1)  | 128.02(4)  |
| C(31)-P(2)-C(25)  | 109.88(5)  |
| C(31)-P(2)-C(37)  | 97.93(5)   |
| C(25)-P(2)-C(37)  | 103.74(5)  |
| C(31)-P(2)-Fe(1)  | 122.91(4)  |
| C(25)-P(2)-Fe(1)  | 106.81(4)  |
| C(37)-P(2)-Fe(1)  | 113.95(4)  |
| C(28)-C(27)-C(26) | 122.09(11) |
| C(28)-C(27)-H(27) | 119.0      |
| C(26)-C(27)-H(27) | 119.0      |
| C(27)-C(26)-C(25) | 117.27(10) |
| C(27)-C(26)-B(1)  | 121.51(10) |
| C(25)-C(26)-B(1)  | 121.22(10) |
| C(45)-C(44)-C(43) | 119.85(14) |
| C(45)-C(44)-H(44) | 120.1      |
| C(43)-C(44)-H(44) | 120.1      |
| C(30)-C(25)-C(26) | 120.38(10) |
| C(30)-C(25)-P(2)  | 124.55(9)  |

|                   |            |
|-------------------|------------|
| C(26)-C(25)-P(2)  | 114.82(8)  |
| C(23)-C(24)-C(19) | 121.45(11) |
| C(23)-C(24)-H(24) | 119.3      |
| C(19)-C(24)-H(24) | 119.3      |
| C(4)-C(5)-C(6)    | 121.63(11) |
| C(4)-C(5)-Fe(1)   | 72.12(7)   |
| C(6)-C(5)-Fe(1)   | 67.37(6)   |
| C(4)-C(5)-H(5)    | 120.1(10)  |
| C(6)-C(5)-H(5)    | 118.0(10)  |
| Fe(1)-C(5)-H(5)   | 130.5(9)   |
| C(34)-C(35)-C(36) | 120.91(12) |
| C(34)-C(35)-H(35) | 119.5      |
| C(36)-C(35)-H(35) | 119.5      |
| C(50)-C(51)-C(52) | 119.26(15) |
| C(50)-C(51)-H(51) | 120.4      |
| C(52)-C(51)-H(51) | 120.4      |
| C(47)-C(48)-C(43) | 119.77(13) |
| C(47)-C(48)-H(48) | 120.1      |
| C(43)-C(48)-H(48) | 120.1      |
| C(53)-C(52)-C(51) | 120.35(14) |
| C(53)-C(52)-H(52) | 119.8      |
| C(51)-C(52)-H(52) | 119.8      |
| C(47)-C(46)-C(45) | 119.88(13) |
| C(47)-C(46)-H(46) | 120.1      |
| C(45)-C(46)-H(46) | 120.1      |
| C(20)-C(19)-C(24) | 118.07(10) |
| C(20)-C(19)-P(1)  | 124.07(9)  |
| C(24)-C(19)-P(1)  | 117.16(9)  |
| C(7)-C(8)-C(9)    | 116.81(10) |
| C(7)-C(8)-B(1)    | 119.09(10) |
| C(9)-C(8)-B(1)    | 124.08(10) |
| C(12)-C(7)-C(8)   | 121.49(10) |
| C(12)-C(7)-P(1)   | 123.60(9)  |
| C(8)-C(7)-P(1)    | 114.81(8)  |
| C(1)-B(1)-C(26)   | 121.37(10) |
| C(1)-B(1)-C(8)    | 119.56(10) |

|                   |            |
|-------------------|------------|
| C(26)-B(1)-C(8)   | 117.97(9)  |
| C(1)-B(1)-Fe(1)   | 58.40(6)   |
| C(26)-B(1)-Fe(1)  | 109.47(8)  |
| C(8)-B(1)-Fe(1)   | 110.78(8)  |
| C(42)-C(37)-C(38) | 118.33(11) |
| C(42)-C(37)-P(2)  | 123.77(9)  |
| C(38)-C(37)-P(2)  | 117.66(9)  |
| C(13)-C(14)-C(15) | 120.25(11) |
| C(13)-C(14)-H(14) | 119.9      |
| C(15)-C(14)-H(14) | 119.9      |
| C(29)-C(28)-C(27) | 119.93(11) |
| C(29)-C(28)-H(28) | 120.0      |
| C(27)-C(28)-H(28) | 120.0      |
| C(10)-C(11)-C(12) | 119.27(11) |
| C(10)-C(11)-H(11) | 120.4      |
| C(12)-C(11)-H(11) | 120.4      |
| C(14)-C(13)-C(18) | 118.98(10) |
| C(14)-C(13)-P(1)  | 124.48(8)  |
| C(18)-C(13)-P(1)  | 116.54(9)  |
| C(37)-C(42)-C(41) | 120.79(12) |
| C(37)-C(42)-H(42) | 119.6      |
| C(41)-C(42)-H(42) | 119.6      |
| C(48)-C(47)-C(46) | 120.35(13) |
| C(48)-C(47)-H(47) | 119.8      |
| C(46)-C(47)-H(47) | 119.8      |
| C(6)-C(1)-C(2)    | 113.91(10) |
| C(6)-C(1)-B(1)    | 115.46(10) |
| C(2)-C(1)-B(1)    | 112.48(10) |
| C(6)-C(1)-Fe(1)   | 73.60(7)   |
| C(2)-C(1)-Fe(1)   | 73.93(7)   |
| B(1)-C(1)-Fe(1)   | 79.02(7)   |
| C(6)-C(1)-C(4)    | 57.71(6)   |
| C(2)-C(1)-C(4)    | 57.42(6)   |
| B(1)-C(1)-C(4)    | 127.73(8)  |
| Fe(1)-C(1)-C(4)   | 48.75(3)   |
| C(49)-C(54)-C(53) | 119.25(15) |

|                   |            |
|-------------------|------------|
| C(49)-C(54)-H(54) | 120.4      |
| C(53)-C(54)-H(54) | 120.4      |
| C(52)-C(53)-C(54) | 120.22(14) |
| C(52)-C(53)-H(53) | 119.9      |
| C(54)-C(53)-H(53) | 119.9      |
| C(3)-C(4)-C(5)    | 117.17(11) |
| C(3)-C(4)-Fe(1)   | 70.30(6)   |
| C(5)-C(4)-Fe(1)   | 70.14(6)   |
| C(3)-C(4)-C(1)    | 58.93(7)   |
| C(5)-C(4)-C(1)    | 58.78(7)   |
| Fe(1)-C(4)-C(1)   | 42.38(3)   |
| C(3)-C(4)-H(4)    | 119.5(10)  |
| C(5)-C(4)-H(4)    | 123.2(10)  |
| Fe(1)-C(4)-H(4)   | 127.7(10)  |
| C(1)-C(4)-H(4)    | 170.0(10)  |
| C(5)-C(6)-C(1)    | 121.79(11) |
| C(5)-C(6)-Fe(1)   | 73.76(7)   |
| C(1)-C(6)-Fe(1)   | 64.87(6)   |
| C(5)-C(6)-H(6)    | 118.7(9)   |
| C(1)-C(6)-H(6)    | 118.1(9)   |
| Fe(1)-C(6)-H(6)   | 124.1(9)   |
| C(16)-C(17)-C(18) | 119.93(11) |
| C(16)-C(17)-H(17) | 120.0      |
| C(18)-C(17)-H(17) | 120.0      |
| C(4)-C(3)-C(2)    | 121.69(11) |
| C(4)-C(3)-Fe(1)   | 72.07(7)   |
| C(2)-C(3)-Fe(1)   | 67.88(6)   |
| C(4)-C(3)-H(3)    | 120.4(10)  |
| C(2)-C(3)-H(3)    | 117.7(10)  |
| Fe(1)-C(3)-H(3)   | 129.9(9)   |
| C(11)-C(12)-C(7)  | 120.24(11) |
| C(11)-C(12)-H(12) | 119.9      |
| C(7)-C(12)-H(12)  | 119.9      |
| C(51)-C(50)-C(49) | 120.48(16) |
| C(51)-C(50)-H(50) | 119.8      |
| C(49)-C(50)-H(50) | 119.8      |



|                   |            |
|-------------------|------------|
| C(35)-C(34)-C(33) | 119.60(12) |
| C(35)-C(34)-H(34) | 120.2      |
| C(33)-C(34)-H(34) | 120.2      |
| C(39)-C(38)-C(37) | 120.98(12) |
| C(39)-C(38)-H(38) | 119.5      |
| C(37)-C(38)-H(38) | 119.5      |
| C(17)-C(18)-C(13) | 120.54(11) |
| C(17)-C(18)-H(18) | 119.7      |
| C(13)-C(18)-H(18) | 119.7      |
| C(54)-C(49)-C(50) | 120.44(15) |
| C(54)-C(49)-H(49) | 119.8      |
| C(50)-C(49)-H(49) | 119.8      |
| C(3)-C(2)-C(1)    | 121.79(11) |
| C(3)-C(2)-Fe(1)   | 73.57(7)   |
| C(1)-C(2)-Fe(1)   | 64.36(6)   |
| C(3)-C(2)-H(2)    | 118.8(10)  |
| C(1)-C(2)-H(2)    | 117.9(10)  |
| Fe(1)-C(2)-H(2)   | 124.5(10)  |
| C(29)-C(30)-C(25) | 120.50(11) |
| C(29)-C(30)-H(30) | 119.8      |
| C(25)-C(30)-H(30) | 119.8      |
| C(21)-C(22)-C(23) | 119.64(11) |
| C(21)-C(22)-H(22) | 120.2      |
| C(23)-C(22)-H(22) | 120.2      |
| C(35)-C(36)-C(31) | 120.11(12) |
| C(35)-C(36)-H(36) | 119.9      |
| C(31)-C(36)-H(36) | 119.9      |
| C(40)-C(41)-C(42) | 120.22(13) |
| C(40)-C(41)-H(41) | 119.9      |
| C(42)-C(41)-H(41) | 119.9      |
| C(22)-C(21)-C(20) | 120.67(12) |
| C(22)-C(21)-H(21) | 119.7      |
| C(20)-C(21)-H(21) | 119.7      |
| C(28)-C(29)-C(30) | 119.79(11) |
| C(28)-C(29)-H(29) | 120.1      |
| C(30)-C(29)-H(29) | 120.1      |

|                   |            |
|-------------------|------------|
| C(24)-C(23)-C(22) | 119.78(12) |
| C(24)-C(23)-H(23) | 120.1      |
| C(22)-C(23)-H(23) | 120.1      |
| C(10)-C(9)-C(8)   | 121.46(11) |
| C(10)-C(9)-H(9)   | 119.3      |
| C(8)-C(9)-H(9)    | 119.3      |
| C(16)-C(15)-C(14) | 120.29(12) |
| C(16)-C(15)-H(15) | 119.9      |
| C(14)-C(15)-H(15) | 119.9      |
| C(38)-C(39)-C(40) | 120.07(13) |
| C(38)-C(39)-H(39) | 120.0      |
| C(40)-C(39)-H(39) | 120.0      |
| C(44)-C(45)-C(46) | 119.96(13) |
| C(44)-C(45)-H(45) | 120.0      |
| C(46)-C(45)-H(45) | 120.0      |
| C(32)-C(31)-C(36) | 118.30(11) |
| C(32)-C(31)-P(2)  | 116.43(8)  |
| C(36)-C(31)-P(2)  | 125.03(9)  |
| C(17)-C(16)-C(15) | 120.01(11) |
| C(17)-C(16)-H(16) | 120.0      |
| C(15)-C(16)-H(16) | 120.0      |
| C(48)-C(43)-C(44) | 120.15(14) |
| C(48)-C(43)-H(43) | 119.9      |
| C(44)-C(43)-H(43) | 119.9      |
| C(32)-C(33)-C(34) | 119.61(12) |
| C(32)-C(33)-H(33) | 120.2      |
| C(34)-C(33)-H(33) | 120.2      |
| C(41)-C(40)-C(39) | 119.60(12) |
| C(41)-C(40)-H(40) | 120.2      |
| C(39)-C(40)-H(40) | 120.2      |
| C(33)-C(32)-C(31) | 121.47(11) |
| C(33)-C(32)-H(32) | 119.3      |
| C(31)-C(32)-H(32) | 119.3      |
| C(11)-C(10)-C(9)  | 120.72(11) |
| C(11)-C(10)-H(10) | 119.6      |
| C(9)-C(10)-H(10)  | 119.6      |

|                   |            |
|-------------------|------------|
| C(21)-C(20)-C(19) | 120.36(12) |
| C(21)-C(20)-H(20) | 119.8      |
| C(19)-C(20)-H(20) | 119.8      |

---

Symmetry transformations used to generate equivalent atoms:

Table S16. Crystal data and structure refinement for **6a**.

|                                   |                                                                                    |                  |
|-----------------------------------|------------------------------------------------------------------------------------|------------------|
| Identification code               | <b>6a</b>                                                                          |                  |
| Empirical formula                 | C <sub>36</sub> H <sub>57</sub> B Fe N <sub>2</sub> P <sub>2</sub> Si <sub>2</sub> |                  |
| Formula weight                    | 702.62                                                                             |                  |
| Temperature                       | 100(2) K                                                                           |                  |
| Wavelength                        | 0.71073 Å                                                                          |                  |
| Crystal system                    | Triclinic                                                                          |                  |
| Space group                       | P-1                                                                                |                  |
| Unit cell dimensions              | a = 10.5707(8) Å                                                                   | α = 118.196(3)°. |
|                                   | b = 19.9433(14) Å                                                                  | β = 97.760(4)°.  |
|                                   | c = 20.5612(15) Å                                                                  | γ = 92.754(3)°.  |
| Volume                            | 3754.1(5) Å <sup>3</sup>                                                           |                  |
| Z                                 | 4                                                                                  |                  |
| Density (calculated)              | 1.243 Mg/m <sup>3</sup>                                                            |                  |
| Absorption coefficient            | 0.578 mm <sup>-1</sup>                                                             |                  |
| F(000)                            | 1504                                                                               |                  |
| Crystal size                      | 0.38 x 0.38 x 0.31 mm <sup>3</sup>                                                 |                  |
| Theta range for data collection   | 1.96 to 50.11°.                                                                    |                  |
| Index ranges                      | -22 ≤ h ≤ 22, -42 ≤ k ≤ 43, -43 ≤ l ≤ 44                                           |                  |
| Reflections collected             | 501556                                                                             |                  |
| Independent reflections           | 77845 [R(int) = 0.0593]                                                            |                  |
| Completeness to theta = 25.00°    | 99.8 %                                                                             |                  |
| Absorption correction             | Semi-empirical from equivalents                                                    |                  |
| Max. and min. transmission        | 0.8411 and 0.8102                                                                  |                  |
| Refinement method                 | Full-matrix least-squares on F <sup>2</sup>                                        |                  |
| Data / restraints / parameters    | 77845 / 0 / 857                                                                    |                  |
| Goodness-of-fit on F <sup>2</sup> | 1.003                                                                              |                  |
| Final R indices [I > 2σ(I)]       | R1 = 0.0378, wR2 = 0.0824                                                          |                  |
| R indices (all data)              | R1 = 0.0690, wR2 = 0.0937                                                          |                  |
| Largest diff. peak and hole       | 0.858 and -0.431 e.Å <sup>-3</sup>                                                 |                  |

Table S17. Atomic coordinates ( $\times 10^4$ ) and equivalent isotropic displacement parameters ( $\text{\AA}^2 \times 10^3$ ) for **6a**.  $U(\text{eq})$  is defined as one third of the trace of the orthogonalized  $U^{\text{ij}}$  tensor.

|        | x        | y        | z       | $U(\text{eq})$ |
|--------|----------|----------|---------|----------------|
| Fe(1)  | 9303(1)  | 6947(1)  | 2615(1) | 7(1)           |
| Fe(2)  | 5306(1)  | 8228(1)  | 7590(1) | 9(1)           |
| P(1)   | 9536(1)  | 7954(1)  | 3762(1) | 8(1)           |
| P(11)  | 5032(1)  | 7256(1)  | 6397(1) | 10(1)          |
| P(2)   | 9411(1)  | 5859(1)  | 2701(1) | 9(1)           |
| P(12)  | 5514(1)  | 7682(1)  | 8319(1) | 11(1)          |
| Si(11) | 7073(1)  | 10143(1) | 7524(1) | 14(1)          |
| Si(12) | 9087(1)  | 9443(1)  | 8043(1) | 17(1)          |
| Si(1)  | 5252(1)  | 6701(1)  | 1672(1) | 13(1)          |
| Si(2)  | 7029(1)  | 6604(1)  | 645(1)  | 13(1)          |
| N(11)  | 6501(1)  | 8854(1)  | 7670(1) | 11(1)          |
| N(1)   | 7943(1)  | 6830(1)  | 2043(1) | 9(1)           |
| N(2)   | 6897(1)  | 6724(1)  | 1551(1) | 12(1)          |
| C(119) | 4063(1)  | 7659(1)  | 8694(1) | 14(1)          |
| C(8)   | 12038(1) | 7982(1)  | 3746(1) | 9(1)           |
| C(7)   | 11128(1) | 8489(1)  | 4031(1) | 10(1)          |
| C(13)  | 9437(1)  | 7912(1)  | 4650(1) | 12(1)          |
| C(3)   | 10572(1) | 7531(1)  | 1514(1) | 15(1)          |
| C(1)   | 11186(1) | 6965(1)  | 2334(1) | 9(1)           |
| N(12)  | 7396(1)  | 9366(1)  | 7709(1) | 13(1)          |
| C(107) | 3388(1)  | 6756(1)  | 6068(1) | 13(1)          |
| C(9)   | 13330(1) | 8301(1)  | 3927(1) | 12(1)          |
| C(19)  | 11065(1) | 5735(1)  | 2963(1) | 11(1)          |
| C(20)  | 11937(1) | 6409(1)  | 3261(1) | 9(1)           |
| C(6)   | 11400(1) | 6302(1)  | 1676(1) | 11(1)          |
| C(21)  | 13195(1) | 6398(1)  | 3578(1) | 11(1)          |
| C(5)   | 11257(1) | 6272(1)  | 991(1)  | 14(1)          |
| C(16)  | 8383(1)  | 8646(1)  | 3813(1) | 12(1)          |
| C(12)  | 11483(1) | 9280(1)  | 4464(1) | 14(1)          |
| C(120) | 2966(1)  | 7538(1)  | 8164(1) | 13(1)          |
| C(25)  | 8746(1)  | 4907(1)  | 1878(1) | 13(1)          |

|        |          |         |         |       |
|--------|----------|---------|---------|-------|
| B(1)   | 11505(1) | 7105(1) | 3154(1) | 9(1)  |
| C(116) | 5239(1)  | 7486(1) | 5634(1) | 14(1) |
| C(113) | 6097(1)  | 6478(1) | 6212(1) | 14(1) |
| C(22)  | 13595(1) | 5732(1) | 3548(1) | 14(1) |
| C(28)  | 8677(1)  | 5852(1) | 3480(1) | 12(1) |
| C(15)  | 10622(1) | 7614(1) | 4890(1) | 15(1) |
| C(110) | 827(1)   | 6092(1) | 5642(1) | 20(1) |
| C(128) | 5808(1)  | 6654(1) | 7978(1) | 14(1) |
| C(109) | 1320(1)  | 6622(1) | 6385(1) | 17(1) |
| C(101) | 3347(1)  | 8461(1) | 7586(1) | 13(1) |
| C(2)   | 10717(1) | 7572(1) | 2231(1) | 11(1) |
| C(11)  | 12771(1) | 9581(1) | 4632(1) | 17(1) |
| C(23)  | 12739(1) | 5058(1) | 3209(1) | 16(1) |
| C(106) | 2774(1)  | 8698(1) | 7065(1) | 16(1) |
| C(108) | 2606(1)  | 6972(1) | 6619(1) | 12(1) |
| C(4)   | 10857(1) | 6902(1) | 910(1)  | 16(1) |
| C(18)  | 7025(1)  | 8303(1) | 3762(1) | 16(1) |
| C(121) | 1766(1)  | 7399(1) | 8330(1) | 19(1) |
| C(102) | 4060(1)  | 9045(1) | 8288(1) | 16(1) |
| C(30)  | 8622(1)  | 5104(1) | 3519(1) | 18(1) |
| C(27)  | 9515(1)  | 4676(1) | 1244(1) | 20(1) |
| C(115) | 7477(1)  | 6809(1) | 6637(1) | 17(1) |
| C(10)  | 13692(1) | 9089(1) | 4368(1) | 15(1) |
| C(125) | 6806(1)  | 8193(1) | 9157(1) | 18(1) |
| C(24)  | 11474(1) | 5059(1) | 2920(1) | 14(1) |
| C(26)  | 7330(1)  | 4882(1) | 1580(1) | 19(1) |
| C(122) | 1670(1)  | 7395(1) | 8998(1) | 23(1) |
| C(130) | 4597(1)  | 6102(1) | 7480(1) | 16(1) |
| C(17)  | 8413(1)  | 8872(1) | 3200(1) | 19(1) |
| C(34)  | 5278(1)  | 6320(1) | 204(1)  | 18(1) |
| C(14)  | 9293(1)  | 8680(1) | 5321(1) | 16(1) |
| C(112) | 2887(1)  | 6226(1) | 5318(1) | 17(1) |
| B(11)  | 3159(1)  | 7629(1) | 7450(1) | 12(1) |
| C(118) | 4220(1)  | 7967(1) | 5552(1) | 19(1) |
| C(29)  | 7356(1)  | 6135(1) | 3521(1) | 16(1) |
| C(103) | 4170(1)  | 9830(1) | 8444(1) | 22(1) |

|        |         |          |         |       |
|--------|---------|----------|---------|-------|
| C(117) | 6590(1) | 7878(1)  | 5746(1) | 18(1) |
| C(124) | 3968(1) | 7674(1)  | 9374(1) | 19(1) |
| C(31)  | 4918(1) | 6311(1)  | 2292(1) | 22(1) |
| C(33)  | 4562(1) | 6050(1)  | 662(1)  | 17(1) |
| C(111) | 1611(1) | 5891(1)  | 5105(1) | 20(1) |
| C(114) | 6126(1) | 5911(1)  | 5389(1) | 21(1) |
| C(35)  | 7981(1) | 5812(1)  | 171(1)  | 20(1) |
| C(131) | 5685(1) | 9931(1)  | 6777(1) | 22(1) |
| C(32)  | 4699(1) | 7659(1)  | 1984(1) | 25(1) |
| C(104) | 3555(1) | 10028(1) | 7944(1) | 25(1) |
| C(135) | 9712(1) | 8515(1)  | 7533(1) | 23(1) |
| C(129) | 6267(1) | 6447(1)  | 8592(1) | 23(1) |
| C(132) | 6964(1) | 10991(1) | 8436(1) | 22(1) |
| C(123) | 2766(1) | 7541(1)  | 9525(1) | 23(1) |
| C(105) | 2834(1) | 9452(1)  | 7246(1) | 22(1) |
| C(133) | 8641(1) | 10257(1) | 7246(1) | 20(1) |
| C(134) | 9693(1) | 10185(1) | 7801(1) | 24(1) |
| C(36)  | 7629(1) | 7545(1)  | 734(1)  | 22(1) |
| C(127) | 8128(1) | 8077(1)  | 8930(1) | 24(1) |
| C(126) | 6657(1) | 9046(1)  | 9590(1) | 26(1) |
| C(136) | 9491(1) | 9844(1)  | 9077(1) | 32(1) |

---

Table S18. Bond lengths [ $\text{\AA}$ ] and angles [ $^\circ$ ] for **6a**.

---

|               |            |
|---------------|------------|
| Fe(1)-N(1)    | 1.6605(5)  |
| Fe(1)-C(1)    | 2.1493(5)  |
| Fe(1)-P(1)    | 2.2312(2)  |
| Fe(1)-P(2)    | 2.2660(2)  |
| Fe(1)-C(2)    | 2.3405(6)  |
| Fe(1)-B(1)    | 2.3768(6)  |
| Fe(2)-N(11)   | 1.6658(5)  |
| Fe(2)-C(101)  | 2.1440(6)  |
| Fe(2)-C(102)  | 2.2266(6)  |
| Fe(2)-P(12)   | 2.2287(2)  |
| Fe(2)-P(11)   | 2.2632(2)  |
| Fe(2)-B(11)   | 2.4288(7)  |
| P(1)-C(7)     | 1.8148(5)  |
| P(1)-C(16)    | 1.8596(6)  |
| P(1)-C(13)    | 1.8835(6)  |
| P(11)-C(107)  | 1.8311(6)  |
| P(11)-C(116)  | 1.8656(6)  |
| P(11)-C(113)  | 1.8830(6)  |
| P(2)-C(19)    | 1.8226(6)  |
| P(2)-C(25)    | 1.8653(6)  |
| P(2)-C(28)    | 1.8771(6)  |
| P(12)-C(119)  | 1.8155(6)  |
| P(12)-C(125)  | 1.8549(7)  |
| P(12)-C(128)  | 1.8833(6)  |
| Si(11)-N(12)  | 1.7991(5)  |
| Si(11)-C(131) | 1.8460(8)  |
| Si(11)-C(133) | 1.8616(7)  |
| Si(11)-C(132) | 1.8630(8)  |
| Si(12)-N(12)  | 1.7983(6)  |
| Si(12)-C(135) | 1.8519(8)  |
| Si(12)-C(136) | 1.8594(10) |
| Si(12)-C(134) | 1.8802(8)  |
| Si(1)-N(2)    | 1.7908(5)  |
| Si(1)-C(31)   | 1.8409(7)  |



|               |            |
|---------------|------------|
| Si(1)-C(32)   | 1.8578(8)  |
| Si(1)-C(33)   | 1.8656(7)  |
| Si(2)-N(2)    | 1.7885(5)  |
| Si(2)-C(35)   | 1.8491(8)  |
| Si(2)-C(36)   | 1.8667(7)  |
| Si(2)-C(34)   | 1.8790(7)  |
| N(11)-N(12)   | 1.3242(7)  |
| N(1)-N(2)     | 1.3282(6)  |
| C(119)-C(124) | 1.4004(9)  |
| C(119)-C(120) | 1.4055(9)  |
| C(8)-C(9)     | 1.4021(8)  |
| C(8)-C(7)     | 1.4053(7)  |
| C(8)-B(1)     | 1.6016(8)  |
| C(7)-C(12)    | 1.3967(7)  |
| C(13)-C(15)   | 1.5325(9)  |
| C(13)-C(14)   | 1.5348(8)  |
| C(13)-H(13)   | 1.0000     |
| C(3)-C(4)     | 1.3681(9)  |
| C(3)-C(2)     | 1.4238(8)  |
| C(3)-H(3)     | 0.988(12)  |
| C(1)-C(2)     | 1.4231(7)  |
| C(1)-C(6)     | 1.4324(7)  |
| C(1)-B(1)     | 1.5574(8)  |
| C(107)-C(112) | 1.4000(9)  |
| C(107)-C(108) | 1.4069(9)  |
| C(9)-C(10)    | 1.3928(8)  |
| C(9)-H(9)     | 0.9500     |
| C(19)-C(24)   | 1.4011(7)  |
| C(19)-C(20)   | 1.4077(7)  |
| C(20)-C(21)   | 1.4047(8)  |
| C(20)-B(1)    | 1.5843(8)  |
| C(6)-C(5)     | 1.3690(8)  |
| C(6)-H(6)     | 0.971(11)  |
| C(21)-C(22)   | 1.3894(8)  |
| C(21)-H(21)   | 0.9500     |
| C(5)-C(4)     | 1.4196(10) |

|               |            |
|---------------|------------|
| C(5)-H(5)     | 0.955(11)  |
| C(16)-C(18)   | 1.5284(9)  |
| C(16)-C(17)   | 1.5295(9)  |
| C(16)-H(16)   | 1.0000     |
| C(12)-C(11)   | 1.3896(9)  |
| C(12)-H(12)   | 0.9500     |
| C(120)-C(121) | 1.4055(9)  |
| C(120)-B(11)  | 1.5994(9)  |
| C(25)-C(27)   | 1.5263(10) |
| C(25)-C(26)   | 1.5276(9)  |
| C(25)-H(25)   | 1.0000     |
| C(116)-C(118) | 1.5215(9)  |
| C(116)-C(117) | 1.5288(9)  |
| C(116)-H(116) | 1.0000     |
| C(113)-C(115) | 1.5318(9)  |
| C(113)-C(114) | 1.5333(9)  |
| C(113)-H(113) | 1.0000     |
| C(22)-C(23)   | 1.3919(9)  |
| C(22)-H(22)   | 0.9500     |
| C(28)-C(29)   | 1.5284(9)  |
| C(28)-C(30)   | 1.5302(8)  |
| C(28)-H(28)   | 1.0000     |
| C(15)-H(15A)  | 0.9800     |
| C(15)-H(15B)  | 0.9800     |
| C(15)-H(15C)  | 0.9800     |
| C(110)-C(109) | 1.3886(10) |
| C(110)-C(111) | 1.3890(12) |
| C(110)-H(110) | 0.9500     |
| C(128)-C(130) | 1.5312(9)  |
| C(128)-C(129) | 1.5326(9)  |
| C(128)-H(128) | 1.0000     |
| C(109)-C(108) | 1.4080(8)  |
| C(109)-H(109) | 0.9500     |
| C(101)-C(102) | 1.4285(9)  |
| C(101)-C(106) | 1.4372(9)  |
| C(101)-B(11)  | 1.5443(9)  |

|               |            |
|---------------|------------|
| C(2)-H(2)     | 0.919(11)  |
| C(11)-C(10)   | 1.3917(9)  |
| C(11)-H(11)   | 0.9500     |
| C(23)-C(24)   | 1.3887(9)  |
| C(23)-H(23)   | 0.9500     |
| C(106)-C(105) | 1.3648(9)  |
| C(106)-H(106) | 0.965(12)  |
| C(108)-B(11)  | 1.5878(9)  |
| C(4)-H(4)     | 0.964(12)  |
| C(18)-H(18A)  | 0.9800     |
| C(18)-H(18B)  | 0.9800     |
| C(18)-H(18C)  | 0.9800     |
| C(121)-C(122) | 1.3953(10) |
| C(121)-H(121) | 0.9500     |
| C(102)-C(103) | 1.4357(9)  |
| C(102)-H(102) | 0.931(12)  |
| C(30)-H(30A)  | 0.9800     |
| C(30)-H(30B)  | 0.9800     |
| C(30)-H(30C)  | 0.9800     |
| C(27)-H(27A)  | 0.9800     |
| C(27)-H(27B)  | 0.9800     |
| C(27)-H(27C)  | 0.9800     |
| C(115)-H(11A) | 0.9800     |
| C(115)-H(11B) | 0.9800     |
| C(115)-H(11C) | 0.9800     |
| C(10)-H(10)   | 0.9500     |
| C(125)-C(127) | 1.5262(11) |
| C(125)-C(126) | 1.5305(12) |
| C(125)-H(125) | 1.0000     |
| C(24)-H(24)   | 0.9500     |
| C(26)-H(26A)  | 0.9800     |
| C(26)-H(26B)  | 0.9800     |
| C(26)-H(26C)  | 0.9800     |
| C(122)-C(123) | 1.3892(12) |
| C(122)-H(122) | 0.9500     |
| C(130)-H(13A) | 0.9800     |

|               |            |
|---------------|------------|
| C(130)-H(13B) | 0.9800     |
| C(130)-H(13C) | 0.9800     |
| C(17)-H(17A)  | 0.9800     |
| C(17)-H(17B)  | 0.9800     |
| C(17)-H(17C)  | 0.9800     |
| C(34)-C(33)   | 1.5445(10) |
| C(34)-H(34A)  | 0.9900     |
| C(34)-H(34B)  | 0.9900     |
| C(14)-H(14A)  | 0.9800     |
| C(14)-H(14B)  | 0.9800     |
| C(14)-H(14C)  | 0.9800     |
| C(112)-C(111) | 1.3911(10) |
| C(112)-H(112) | 0.9500     |
| C(118)-H(11D) | 0.9800     |
| C(118)-H(11E) | 0.9800     |
| C(118)-H(11F) | 0.9800     |
| C(29)-H(29A)  | 0.9800     |
| C(29)-H(29B)  | 0.9800     |
| C(29)-H(29C)  | 0.9800     |
| C(103)-C(104) | 1.3645(13) |
| C(103)-H(103) | 0.942(13)  |
| C(117)-H(11G) | 0.9800     |
| C(117)-H(11H) | 0.9800     |
| C(117)-H(11I) | 0.9800     |
| C(124)-C(123) | 1.3908(11) |
| C(124)-H(124) | 0.9500     |
| C(31)-H(31A)  | 0.9800     |
| C(31)-H(31B)  | 0.9800     |
| C(31)-H(31C)  | 0.9800     |
| C(33)-H(33A)  | 0.9900     |
| C(33)-H(33B)  | 0.9900     |
| C(111)-H(111) | 0.9500     |
| C(114)-H(11J) | 0.9800     |
| C(114)-H(11K) | 0.9800     |
| C(114)-H(11L) | 0.9800     |
| C(35)-H(35A)  | 0.9800     |

|               |            |
|---------------|------------|
| C(35)-H(35B)  | 0.9800     |
| C(35)-H(35C)  | 0.9800     |
| C(131)-H(13D) | 0.9800     |
| C(131)-H(13E) | 0.9800     |
| C(131)-H(13F) | 0.9800     |
| C(32)-H(32A)  | 0.9800     |
| C(32)-H(32B)  | 0.9800     |
| C(32)-H(32C)  | 0.9800     |
| C(104)-C(105) | 1.4223(13) |
| C(104)-H(104) | 0.955(14)  |
| C(135)-H(13G) | 0.9800     |
| C(135)-H(13H) | 0.9800     |
| C(135)-H(13I) | 0.9800     |
| C(129)-H(12A) | 0.9800     |
| C(129)-H(12B) | 0.9800     |
| C(129)-H(12C) | 0.9800     |
| C(132)-H(13J) | 0.9800     |
| C(132)-H(13K) | 0.9800     |
| C(132)-H(13L) | 0.9800     |
| C(123)-H(123) | 0.9500     |
| C(105)-H(105) | 0.960(13)  |
| C(133)-C(134) | 1.5454(12) |
| C(133)-H(13M) | 0.9900     |
| C(133)-H(13N) | 0.9900     |
| C(134)-H(13O) | 0.9900     |
| C(134)-H(13P) | 0.9900     |
| C(36)-H(36A)  | 0.9800     |
| C(36)-H(36B)  | 0.9800     |
| C(36)-H(36C)  | 0.9800     |
| C(127)-H(12D) | 0.9800     |
| C(127)-H(12E) | 0.9800     |
| C(127)-H(12F) | 0.9800     |
| C(126)-H(12G) | 0.9800     |
| C(126)-H(12H) | 0.9800     |
| C(126)-H(12I) | 0.9800     |
| C(136)-H(13Q) | 0.9800     |

|                     |             |
|---------------------|-------------|
| C(136)-H(13R)       | 0.9800      |
| C(136)-H(13S)       | 0.9800      |
| N(1)-Fe(1)-C(1)     | 124.23(2)   |
| N(1)-Fe(1)-P(1)     | 115.257(18) |
| C(1)-Fe(1)-P(1)     | 103.259(15) |
| N(1)-Fe(1)-P(2)     | 107.771(17) |
| C(1)-Fe(1)-P(2)     | 94.473(14)  |
| P(1)-Fe(1)-P(2)     | 109.521(8)  |
| N(1)-Fe(1)-C(2)     | 100.68(2)   |
| C(1)-Fe(1)-C(2)     | 36.646(19)  |
| P(1)-Fe(1)-C(2)     | 92.649(15)  |
| P(2)-Fe(1)-C(2)     | 130.728(15) |
| N(1)-Fe(1)-B(1)     | 164.05(2)   |
| C(1)-Fe(1)-B(1)     | 39.85(2)    |
| P(1)-Fe(1)-B(1)     | 74.585(15)  |
| P(2)-Fe(1)-B(1)     | 78.689(15)  |
| C(2)-Fe(1)-B(1)     | 65.30(2)    |
| N(11)-Fe(2)-C(101)  | 122.67(2)   |
| N(11)-Fe(2)-C(102)  | 99.39(2)    |
| C(101)-Fe(2)-C(102) | 38.09(2)    |
| N(11)-Fe(2)-P(12)   | 119.708(19) |
| C(101)-Fe(2)-P(12)  | 102.087(17) |
| C(102)-Fe(2)-P(12)  | 92.211(19)  |
| N(11)-Fe(2)-P(11)   | 105.884(18) |
| C(101)-Fe(2)-P(11)  | 97.394(18)  |
| C(102)-Fe(2)-P(11)  | 135.216(19) |
| P(12)-Fe(2)-P(11)   | 105.878(10) |
| N(11)-Fe(2)-B(11)   | 161.34(2)   |
| C(101)-Fe(2)-B(11)  | 38.85(2)    |
| C(102)-Fe(2)-B(11)  | 66.53(2)    |
| P(12)-Fe(2)-B(11)   | 74.645(17)  |
| P(11)-Fe(2)-B(11)   | 79.103(18)  |
| C(7)-P(1)-C(16)     | 105.78(3)   |
| C(7)-P(1)-C(13)     | 99.26(3)    |
| C(16)-P(1)-C(13)    | 101.20(3)   |

|                      |             |
|----------------------|-------------|
| C(7)-P(1)-Fe(1)      | 110.465(18) |
| C(16)-P(1)-Fe(1)     | 112.20(2)   |
| C(13)-P(1)-Fe(1)     | 125.759(19) |
| C(107)-P(11)-C(116)  | 101.28(3)   |
| C(107)-P(11)-C(113)  | 104.92(3)   |
| C(116)-P(11)-C(113)  | 101.43(3)   |
| C(107)-P(11)-Fe(2)   | 111.85(2)   |
| C(116)-P(11)-Fe(2)   | 118.70(2)   |
| C(113)-P(11)-Fe(2)   | 116.66(2)   |
| C(19)-P(2)-C(25)     | 103.31(3)   |
| C(19)-P(2)-C(28)     | 100.65(3)   |
| C(25)-P(2)-C(28)     | 103.35(3)   |
| C(19)-P(2)-Fe(1)     | 111.878(18) |
| C(25)-P(2)-Fe(1)     | 120.49(2)   |
| C(28)-P(2)-Fe(1)     | 114.763(19) |
| C(119)-P(12)-C(125)  | 104.70(3)   |
| C(119)-P(12)-C(128)  | 98.75(3)    |
| C(125)-P(12)-C(128)  | 101.43(3)   |
| C(119)-P(12)-Fe(2)   | 111.84(2)   |
| C(125)-P(12)-Fe(2)   | 113.80(2)   |
| C(128)-P(12)-Fe(2)   | 123.84(2)   |
| N(12)-Si(11)-C(131)  | 115.60(3)   |
| N(12)-Si(11)-C(133)  | 96.95(3)    |
| C(131)-Si(11)-C(133) | 112.60(4)   |
| N(12)-Si(11)-C(132)  | 107.24(3)   |
| C(131)-Si(11)-C(132) | 113.24(4)   |
| C(133)-Si(11)-C(132) | 109.97(4)   |
| N(12)-Si(12)-C(135)  | 111.09(3)   |
| N(12)-Si(12)-C(136)  | 112.99(4)   |
| C(135)-Si(12)-C(136) | 111.95(5)   |
| N(12)-Si(12)-C(134)  | 98.81(3)    |
| C(135)-Si(12)-C(134) | 112.87(4)   |
| C(136)-Si(12)-C(134) | 108.46(4)   |
| N(2)-Si(1)-C(31)     | 113.82(3)   |
| N(2)-Si(1)-C(32)     | 111.27(3)   |
| C(31)-Si(1)-C(32)    | 111.14(4)   |

|                      |           |
|----------------------|-----------|
| N(2)-Si(1)-C(33)     | 95.98(3)  |
| C(31)-Si(1)-C(33)    | 113.74(4) |
| C(32)-Si(1)-C(33)    | 110.02(4) |
| N(2)-Si(2)-C(35)     | 109.88(3) |
| N(2)-Si(2)-C(36)     | 109.61(3) |
| C(35)-Si(2)-C(36)    | 115.53(4) |
| N(2)-Si(2)-C(34)     | 98.59(3)  |
| C(35)-Si(2)-C(34)    | 111.17(3) |
| C(36)-Si(2)-C(34)    | 110.75(3) |
| N(12)-N(11)-Fe(2)    | 176.17(5) |
| N(2)-N(1)-Fe(1)      | 176.35(4) |
| N(1)-N(2)-Si(2)      | 120.68(4) |
| N(1)-N(2)-Si(1)      | 127.93(4) |
| Si(2)-N(2)-Si(1)     | 111.37(3) |
| C(124)-C(119)-C(120) | 121.76(6) |
| C(124)-C(119)-P(12)  | 127.56(5) |
| C(120)-C(119)-P(12)  | 110.36(4) |
| C(9)-C(8)-C(7)       | 117.32(5) |
| C(9)-C(8)-B(1)       | 124.59(5) |
| C(7)-C(8)-B(1)       | 117.55(5) |
| C(12)-C(7)-C(8)      | 121.80(5) |
| C(12)-C(7)-P(1)      | 128.24(4) |
| C(8)-C(7)-P(1)       | 109.96(4) |
| C(15)-C(13)-C(14)    | 107.59(5) |
| C(15)-C(13)-P(1)     | 111.40(4) |
| C(14)-C(13)-P(1)     | 114.52(4) |
| C(15)-C(13)-H(13)    | 107.7     |
| C(14)-C(13)-H(13)    | 107.7     |
| P(1)-C(13)-H(13)     | 107.7     |
| C(4)-C(3)-C(2)       | 120.57(6) |
| C(4)-C(3)-H(3)       | 120.0(7)  |
| C(2)-C(3)-H(3)       | 119.3(7)  |
| C(2)-C(1)-C(6)       | 116.60(5) |
| C(2)-C(1)-B(1)       | 117.21(5) |
| C(6)-C(1)-B(1)       | 126.06(5) |
| C(2)-C(1)-Fe(1)      | 79.00(3)  |



|                      |           |
|----------------------|-----------|
| C(6)-C(1)-Fe(1)      | 116.08(4) |
| B(1)-C(1)-Fe(1)      | 77.97(3)  |
| N(11)-N(12)-Si(12)   | 124.97(4) |
| N(11)-N(12)-Si(11)   | 124.64(4) |
| Si(12)-N(12)-Si(11)  | 110.12(3) |
| C(112)-C(107)-C(108) | 120.77(6) |
| C(112)-C(107)-P(11)  | 123.86(5) |
| C(108)-C(107)-P(11)  | 115.27(4) |
| C(10)-C(9)-C(8)      | 121.10(5) |
| C(10)-C(9)-H(9)      | 119.4     |
| C(8)-C(9)-H(9)       | 119.4     |
| C(24)-C(19)-C(20)    | 120.91(5) |
| C(24)-C(19)-P(2)     | 125.47(4) |
| C(20)-C(19)-P(2)     | 113.54(4) |
| C(21)-C(20)-C(19)    | 117.47(5) |
| C(21)-C(20)-B(1)     | 123.23(5) |
| C(19)-C(20)-B(1)     | 119.00(5) |
| C(5)-C(6)-C(1)       | 122.03(5) |
| C(5)-C(6)-H(6)       | 119.6(7)  |
| C(1)-C(6)-H(6)       | 118.3(7)  |
| C(22)-C(21)-C(20)    | 121.45(5) |
| C(22)-C(21)-H(21)    | 119.3     |
| C(20)-C(21)-H(21)    | 119.3     |
| C(6)-C(5)-C(4)       | 120.20(5) |
| C(6)-C(5)-H(5)       | 119.6(7)  |
| C(4)-C(5)-H(5)       | 120.2(7)  |
| C(18)-C(16)-C(17)    | 110.49(5) |
| C(18)-C(16)-P(1)     | 109.60(4) |
| C(17)-C(16)-P(1)     | 112.01(4) |
| C(18)-C(16)-H(16)    | 108.2     |
| C(17)-C(16)-H(16)    | 108.2     |
| P(1)-C(16)-H(16)     | 108.2     |
| C(11)-C(12)-C(7)     | 119.64(5) |
| C(11)-C(12)-H(12)    | 120.2     |
| C(7)-C(12)-H(12)     | 120.2     |
| C(119)-C(120)-C(121) | 117.03(6) |

|                      |           |
|----------------------|-----------|
| C(119)-C(120)-B(11)  | 118.11(5) |
| C(121)-C(120)-B(11)  | 124.69(6) |
| C(27)-C(25)-C(26)    | 109.74(6) |
| C(27)-C(25)-P(2)     | 112.57(4) |
| C(26)-C(25)-P(2)     | 111.76(4) |
| C(27)-C(25)-H(25)    | 107.5     |
| C(26)-C(25)-H(25)    | 107.5     |
| P(2)-C(25)-H(25)     | 107.5     |
| C(1)-B(1)-C(20)      | 116.95(4) |
| C(1)-B(1)-C(8)       | 112.57(4) |
| C(20)-B(1)-C(8)      | 122.93(5) |
| C(1)-B(1)-Fe(1)      | 62.18(3)  |
| C(20)-B(1)-Fe(1)     | 114.72(4) |
| C(8)-B(1)-Fe(1)      | 112.26(4) |
| C(118)-C(116)-C(117) | 110.87(5) |
| C(118)-C(116)-P(11)  | 110.77(5) |
| C(117)-C(116)-P(11)  | 112.54(4) |
| C(118)-C(116)-H(116) | 107.5     |
| C(117)-C(116)-H(116) | 107.5     |
| P(11)-C(116)-H(116)  | 107.5     |
| C(115)-C(113)-C(114) | 109.36(6) |
| C(115)-C(113)-P(11)  | 111.48(4) |
| C(114)-C(113)-P(11)  | 116.98(5) |
| C(115)-C(113)-H(113) | 106.1     |
| C(114)-C(113)-H(113) | 106.1     |
| P(11)-C(113)-H(113)  | 106.1     |
| C(21)-C(22)-C(23)    | 120.10(5) |
| C(21)-C(22)-H(22)    | 119.9     |
| C(23)-C(22)-H(22)    | 119.9     |
| C(29)-C(28)-C(30)    | 109.96(5) |
| C(29)-C(28)-P(2)     | 112.85(4) |
| C(30)-C(28)-P(2)     | 116.66(5) |
| C(29)-C(28)-H(28)    | 105.5     |
| C(30)-C(28)-H(28)    | 105.5     |
| P(2)-C(28)-H(28)     | 105.5     |
| C(13)-C(15)-H(15A)   | 109.5     |

|                      |           |
|----------------------|-----------|
| C(13)-C(15)-H(15B)   | 109.5     |
| H(15A)-C(15)-H(15B)  | 109.5     |
| C(13)-C(15)-H(15C)   | 109.5     |
| H(15A)-C(15)-H(15C)  | 109.5     |
| H(15B)-C(15)-H(15C)  | 109.5     |
| C(109)-C(110)-C(111) | 120.00(6) |
| C(109)-C(110)-H(110) | 120.0     |
| C(111)-C(110)-H(110) | 120.0     |
| C(130)-C(128)-C(129) | 107.80(5) |
| C(130)-C(128)-P(12)  | 110.98(4) |
| C(129)-C(128)-P(12)  | 115.58(5) |
| C(130)-C(128)-H(128) | 107.4     |
| C(129)-C(128)-H(128) | 107.4     |
| P(12)-C(128)-H(128)  | 107.4     |
| C(110)-C(109)-C(108) | 121.97(7) |
| C(110)-C(109)-H(109) | 119.0     |
| C(108)-C(109)-H(109) | 119.0     |
| C(102)-C(101)-C(106) | 117.26(6) |
| C(102)-C(101)-B(11)  | 118.78(5) |
| C(106)-C(101)-B(11)  | 123.83(6) |
| C(102)-C(101)-Fe(2)  | 74.09(4)  |
| C(106)-C(101)-Fe(2)  | 118.68(4) |
| B(11)-C(101)-Fe(2)   | 80.59(3)  |
| C(1)-C(2)-C(3)       | 120.52(5) |
| C(1)-C(2)-Fe(1)      | 64.35(3)  |
| C(3)-C(2)-Fe(1)      | 126.15(4) |
| C(1)-C(2)-H(2)       | 119.3(7)  |
| C(3)-C(2)-H(2)       | 117.4(7)  |
| Fe(1)-C(2)-H(2)      | 94.9(7)   |
| C(12)-C(11)-C(10)    | 119.57(5) |
| C(12)-C(11)-H(11)    | 120.2     |
| C(10)-C(11)-H(11)    | 120.2     |
| C(24)-C(23)-C(22)    | 119.77(5) |
| C(24)-C(23)-H(23)    | 120.1     |
| C(22)-C(23)-H(23)    | 120.1     |
| C(105)-C(106)-C(101) | 121.82(7) |

|                      |           |
|----------------------|-----------|
| C(105)-C(106)-H(106) | 119.8(7)  |
| C(101)-C(106)-H(106) | 118.1(7)  |
| C(107)-C(108)-C(109) | 117.19(6) |
| C(107)-C(108)-B(11)  | 119.78(5) |
| C(109)-C(108)-B(11)  | 122.90(6) |
| C(3)-C(4)-C(5)       | 119.87(6) |
| C(3)-C(4)-H(4)       | 119.0(7)  |
| C(5)-C(4)-H(4)       | 121.1(7)  |
| C(16)-C(18)-H(18A)   | 109.5     |
| C(16)-C(18)-H(18B)   | 109.5     |
| H(18A)-C(18)-H(18B)  | 109.5     |
| C(16)-C(18)-H(18C)   | 109.5     |
| H(18A)-C(18)-H(18C)  | 109.5     |
| H(18B)-C(18)-H(18C)  | 109.5     |
| C(122)-C(121)-C(120) | 121.34(7) |
| C(122)-C(121)-H(121) | 119.3     |
| C(120)-C(121)-H(121) | 119.3     |
| C(101)-C(102)-C(103) | 119.55(6) |
| C(101)-C(102)-Fe(2)  | 67.82(3)  |
| C(103)-C(102)-Fe(2)  | 121.51(5) |
| C(101)-C(102)-H(102) | 120.2(7)  |
| C(103)-C(102)-H(102) | 116.7(7)  |
| Fe(2)-C(102)-H(102)  | 98.7(7)   |
| C(28)-C(30)-H(30A)   | 109.5     |
| C(28)-C(30)-H(30B)   | 109.5     |
| H(30A)-C(30)-H(30B)  | 109.5     |
| C(28)-C(30)-H(30C)   | 109.5     |
| H(30A)-C(30)-H(30C)  | 109.5     |
| H(30B)-C(30)-H(30C)  | 109.5     |
| C(25)-C(27)-H(27A)   | 109.5     |
| C(25)-C(27)-H(27B)   | 109.5     |
| H(27A)-C(27)-H(27B)  | 109.5     |
| C(25)-C(27)-H(27C)   | 109.5     |
| H(27A)-C(27)-H(27C)  | 109.5     |
| H(27B)-C(27)-H(27C)  | 109.5     |
| C(113)-C(115)-H(11A) | 109.5     |

|                      |           |
|----------------------|-----------|
| C(113)-C(115)-H(11B) | 109.5     |
| H(11A)-C(115)-H(11B) | 109.5     |
| C(113)-C(115)-H(11C) | 109.5     |
| H(11A)-C(115)-H(11C) | 109.5     |
| H(11B)-C(115)-H(11C) | 109.5     |
| C(11)-C(10)-C(9)     | 120.55(5) |
| C(11)-C(10)-H(10)    | 119.7     |
| C(9)-C(10)-H(10)     | 119.7     |
| C(127)-C(125)-C(126) | 111.37(6) |
| C(127)-C(125)-P(12)  | 110.48(5) |
| C(126)-C(125)-P(12)  | 110.83(5) |
| C(127)-C(125)-H(125) | 108.0     |
| C(126)-C(125)-H(125) | 108.0     |
| P(12)-C(125)-H(125)  | 108.0     |
| C(23)-C(24)-C(19)    | 120.05(5) |
| C(23)-C(24)-H(24)    | 120.0     |
| C(19)-C(24)-H(24)    | 120.0     |
| C(25)-C(26)-H(26A)   | 109.5     |
| C(25)-C(26)-H(26B)   | 109.5     |
| H(26A)-C(26)-H(26B)  | 109.5     |
| C(25)-C(26)-H(26C)   | 109.5     |
| H(26A)-C(26)-H(26C)  | 109.5     |
| H(26B)-C(26)-H(26C)  | 109.5     |
| C(123)-C(122)-C(121) | 120.53(7) |
| C(123)-C(122)-H(122) | 119.7     |
| C(121)-C(122)-H(122) | 119.7     |
| C(128)-C(130)-H(13A) | 109.5     |
| C(128)-C(130)-H(13B) | 109.5     |
| H(13A)-C(130)-H(13B) | 109.5     |
| C(128)-C(130)-H(13C) | 109.5     |
| H(13A)-C(130)-H(13C) | 109.5     |
| H(13B)-C(130)-H(13C) | 109.5     |
| C(16)-C(17)-H(17A)   | 109.5     |
| C(16)-C(17)-H(17B)   | 109.5     |
| H(17A)-C(17)-H(17B)  | 109.5     |
| C(16)-C(17)-H(17C)   | 109.5     |

|                      |           |
|----------------------|-----------|
| H(17A)-C(17)-H(17C)  | 109.5     |
| H(17B)-C(17)-H(17C)  | 109.5     |
| C(33)-C(34)-Si(2)    | 109.03(4) |
| C(33)-C(34)-H(34A)   | 109.9     |
| Si(2)-C(34)-H(34A)   | 109.9     |
| C(33)-C(34)-H(34B)   | 109.9     |
| Si(2)-C(34)-H(34B)   | 109.9     |
| H(34A)-C(34)-H(34B)  | 108.3     |
| C(13)-C(14)-H(14A)   | 109.5     |
| C(13)-C(14)-H(14B)   | 109.5     |
| H(14A)-C(14)-H(14B)  | 109.5     |
| C(13)-C(14)-H(14C)   | 109.5     |
| H(14A)-C(14)-H(14C)  | 109.5     |
| H(14B)-C(14)-H(14C)  | 109.5     |
| C(111)-C(112)-C(107) | 120.63(7) |
| C(111)-C(112)-H(112) | 119.7     |
| C(107)-C(112)-H(112) | 119.7     |
| C(101)-B(11)-C(108)  | 117.39(5) |
| C(101)-B(11)-C(120)  | 115.75(5) |
| C(108)-B(11)-C(120)  | 121.77(5) |
| C(101)-B(11)-Fe(2)   | 60.56(3)  |
| C(108)-B(11)-Fe(2)   | 113.20(4) |
| C(120)-B(11)-Fe(2)   | 112.30(4) |
| C(116)-C(118)-H(11D) | 109.5     |
| C(116)-C(118)-H(11E) | 109.5     |
| H(11D)-C(118)-H(11E) | 109.5     |
| C(116)-C(118)-H(11F) | 109.5     |
| H(11D)-C(118)-H(11F) | 109.5     |
| H(11E)-C(118)-H(11F) | 109.5     |
| C(28)-C(29)-H(29A)   | 109.5     |
| C(28)-C(29)-H(29B)   | 109.5     |
| H(29A)-C(29)-H(29B)  | 109.5     |
| C(28)-C(29)-H(29C)   | 109.5     |
| H(29A)-C(29)-H(29C)  | 109.5     |
| H(29B)-C(29)-H(29C)  | 109.5     |
| C(104)-C(103)-C(102) | 120.80(7) |

|                      |           |
|----------------------|-----------|
| C(104)-C(103)-H(103) | 120.4(8)  |
| C(102)-C(103)-H(103) | 118.7(8)  |
| C(116)-C(117)-H(11G) | 109.5     |
| C(116)-C(117)-H(11H) | 109.5     |
| H(11G)-C(117)-H(11H) | 109.5     |
| C(116)-C(117)-H(11I) | 109.5     |
| H(11G)-C(117)-H(11I) | 109.5     |
| H(11H)-C(117)-H(11I) | 109.5     |
| C(123)-C(124)-C(119) | 119.81(7) |
| C(123)-C(124)-H(124) | 120.1     |
| C(119)-C(124)-H(124) | 120.1     |
| Si(1)-C(31)-H(31A)   | 109.5     |
| Si(1)-C(31)-H(31B)   | 109.5     |
| H(31A)-C(31)-H(31B)  | 109.5     |
| Si(1)-C(31)-H(31C)   | 109.5     |
| H(31A)-C(31)-H(31C)  | 109.5     |
| H(31B)-C(31)-H(31C)  | 109.5     |
| C(34)-C(33)-Si(1)    | 106.97(4) |
| C(34)-C(33)-H(33A)   | 110.3     |
| Si(1)-C(33)-H(33A)   | 110.3     |
| C(34)-C(33)-H(33B)   | 110.3     |
| Si(1)-C(33)-H(33B)   | 110.3     |
| H(33A)-C(33)-H(33B)  | 108.6     |
| C(110)-C(111)-C(112) | 119.44(6) |
| C(110)-C(111)-H(111) | 120.3     |
| C(112)-C(111)-H(111) | 120.3     |
| C(113)-C(114)-H(11J) | 109.5     |
| C(113)-C(114)-H(11K) | 109.5     |
| H(11J)-C(114)-H(11K) | 109.5     |
| C(113)-C(114)-H(11L) | 109.5     |
| H(11J)-C(114)-H(11L) | 109.5     |
| H(11K)-C(114)-H(11L) | 109.5     |
| Si(2)-C(35)-H(35A)   | 109.5     |
| Si(2)-C(35)-H(35B)   | 109.5     |
| H(35A)-C(35)-H(35B)  | 109.5     |
| Si(2)-C(35)-H(35C)   | 109.5     |

|                      |           |
|----------------------|-----------|
| H(35A)-C(35)-H(35C)  | 109.5     |
| H(35B)-C(35)-H(35C)  | 109.5     |
| Si(11)-C(131)-H(13D) | 109.5     |
| Si(11)-C(131)-H(13E) | 109.5     |
| H(13D)-C(131)-H(13E) | 109.5     |
| Si(11)-C(131)-H(13F) | 109.5     |
| H(13D)-C(131)-H(13F) | 109.5     |
| H(13E)-C(131)-H(13F) | 109.5     |
| Si(1)-C(32)-H(32A)   | 109.5     |
| Si(1)-C(32)-H(32B)   | 109.5     |
| H(32A)-C(32)-H(32B)  | 109.5     |
| Si(1)-C(32)-H(32C)   | 109.5     |
| H(32A)-C(32)-H(32C)  | 109.5     |
| H(32B)-C(32)-H(32C)  | 109.5     |
| C(103)-C(104)-C(105) | 120.15(6) |
| C(103)-C(104)-H(104) | 120.3(8)  |
| C(105)-C(104)-H(104) | 119.6(8)  |
| Si(12)-C(135)-H(13G) | 109.5     |
| Si(12)-C(135)-H(13H) | 109.5     |
| H(13G)-C(135)-H(13H) | 109.5     |
| Si(12)-C(135)-H(13I) | 109.5     |
| H(13G)-C(135)-H(13I) | 109.5     |
| H(13H)-C(135)-H(13I) | 109.5     |
| C(128)-C(129)-H(12A) | 109.5     |
| C(128)-C(129)-H(12B) | 109.5     |
| H(12A)-C(129)-H(12B) | 109.5     |
| C(128)-C(129)-H(12C) | 109.5     |
| H(12A)-C(129)-H(12C) | 109.5     |
| H(12B)-C(129)-H(12C) | 109.5     |
| Si(11)-C(132)-H(13J) | 109.5     |
| Si(11)-C(132)-H(13K) | 109.5     |
| H(13J)-C(132)-H(13K) | 109.5     |
| Si(11)-C(132)-H(13L) | 109.5     |
| H(13J)-C(132)-H(13L) | 109.5     |
| H(13K)-C(132)-H(13L) | 109.5     |
| C(122)-C(123)-C(124) | 119.47(7) |



|                      |           |
|----------------------|-----------|
| C(122)-C(123)-H(123) | 120.3     |
| C(124)-C(123)-H(123) | 120.3     |
| C(106)-C(105)-C(104) | 120.23(7) |
| C(106)-C(105)-H(105) | 119.5(8)  |
| C(104)-C(105)-H(105) | 120.3(8)  |
| C(134)-C(133)-Si(11) | 106.69(5) |
| C(134)-C(133)-H(13M) | 110.4     |
| Si(11)-C(133)-H(13M) | 110.4     |
| C(134)-C(133)-H(13N) | 110.4     |
| Si(11)-C(133)-H(13N) | 110.4     |
| H(13M)-C(133)-H(13N) | 108.6     |
| C(133)-C(134)-Si(12) | 110.09(5) |
| C(133)-C(134)-H(13O) | 109.6     |
| Si(12)-C(134)-H(13O) | 109.6     |
| C(133)-C(134)-H(13P) | 109.6     |
| Si(12)-C(134)-H(13P) | 109.6     |
| H(13O)-C(134)-H(13P) | 108.2     |
| Si(2)-C(36)-H(36A)   | 109.5     |
| Si(2)-C(36)-H(36B)   | 109.5     |
| H(36A)-C(36)-H(36B)  | 109.5     |
| Si(2)-C(36)-H(36C)   | 109.5     |
| H(36A)-C(36)-H(36C)  | 109.5     |
| H(36B)-C(36)-H(36C)  | 109.5     |
| C(125)-C(127)-H(12D) | 109.5     |
| C(125)-C(127)-H(12E) | 109.5     |
| H(12D)-C(127)-H(12E) | 109.5     |
| C(125)-C(127)-H(12F) | 109.5     |
| H(12D)-C(127)-H(12F) | 109.5     |
| H(12E)-C(127)-H(12F) | 109.5     |
| C(125)-C(126)-H(12G) | 109.5     |
| C(125)-C(126)-H(12H) | 109.5     |
| H(12G)-C(126)-H(12H) | 109.5     |
| C(125)-C(126)-H(12I) | 109.5     |
| H(12G)-C(126)-H(12I) | 109.5     |
| H(12H)-C(126)-H(12I) | 109.5     |
| Si(12)-C(136)-H(13Q) | 109.5     |

|                      |       |
|----------------------|-------|
| Si(12)-C(136)-H(13R) | 109.5 |
| H(13Q)-C(136)-H(13R) | 109.5 |
| Si(12)-C(136)-H(13S) | 109.5 |
| H(13Q)-C(136)-H(13S) | 109.5 |
| H(13R)-C(136)-H(13S) | 109.5 |

---

Symmetry transformations used to generate equivalent atoms:

Table S19. Crystal data and structure refinement for **6b**.

|                                   |                                                                                    |                 |
|-----------------------------------|------------------------------------------------------------------------------------|-----------------|
| Identification code               | <b>6b</b>                                                                          |                 |
| Empirical formula                 | C <sub>48</sub> H <sub>49</sub> B Fe N <sub>2</sub> P <sub>2</sub> Si <sub>2</sub> |                 |
| Formula weight                    | 838.67                                                                             |                 |
| Temperature                       | 100(2) K                                                                           |                 |
| Wavelength                        | 0.71073 Å                                                                          |                 |
| Crystal system                    | Monoclinic                                                                         |                 |
| Space group                       | P2(1)/n                                                                            |                 |
| Unit cell dimensions              | a = 10.7196(6) Å                                                                   | α = 90°.        |
|                                   | b = 18.1906(11) Å                                                                  | β = 92.637(2)°. |
|                                   | c = 21.7101(10) Å                                                                  | γ = 90°.        |
| Volume                            | 4228.9(4) Å <sup>3</sup>                                                           |                 |
| Z                                 | 4                                                                                  |                 |
| Density (calculated)              | 1.317 Mg/m <sup>3</sup>                                                            |                 |
| Absorption coefficient            | 0.526 mm <sup>-1</sup>                                                             |                 |
| F(000)                            | 1760                                                                               |                 |
| Crystal size                      | 0.37 x 0.16 x 0.08 mm <sup>3</sup>                                                 |                 |
| Theta range for data collection   | 1.88 to 41.63°.                                                                    |                 |
| Index ranges                      | -19 ≤ h ≤ 19, -33 ≤ k ≤ 33, -39 ≤ l ≤ 40                                           |                 |
| Reflections collected             | 196104                                                                             |                 |
| Independent reflections           | 28150 [R(int) = 0.0667]                                                            |                 |
| Completeness to theta = 25.00°    | 100.0 %                                                                            |                 |
| Absorption correction             | Semi-empirical from equivalents                                                    |                 |
| Max. and min. transmission        | 1.0000 and 0.9285                                                                  |                 |
| Refinement method                 | Full-matrix least-squares on F <sup>2</sup>                                        |                 |
| Data / restraints / parameters    | 28150 / 0 / 529                                                                    |                 |
| Goodness-of-fit on F <sup>2</sup> | 1.012                                                                              |                 |
| Final R indices [I > 2σ(I)]       | R1 = 0.0407, wR2 = 0.0901                                                          |                 |
| R indices (all data)              | R1 = 0.0750, wR2 = 0.1024                                                          |                 |
| Largest diff. peak and hole       | 0.789 and -0.378 e.Å <sup>-3</sup>                                                 |                 |

Table S20. Atomic coordinates ( $\times 10^4$ ) and equivalent isotropic displacement parameters ( $\text{\AA}^2 \times 10^3$ ) for **6b**.  $U(\text{eq})$  is defined as one third of the trace of the orthogonalized  $U^j$  tensor.

|       | x       | y       | z        | $U(\text{eq})$ |
|-------|---------|---------|----------|----------------|
| Fe(1) | 5380(1) | 2224(1) | 8265(1)  | 8(1)           |
| P(1)  | 6191(1) | 2067(1) | 9207(1)  | 8(1)           |
| P(2)  | 4537(1) | 3342(1) | 8294(1)  | 9(1)           |
| Si(1) | 6747(1) | 2697(1) | 6503(1)  | 13(1)          |
| Si(2) | 8832(1) | 2245(1) | 7385(1)  | 12(1)          |
| N(1)  | 6366(1) | 2285(1) | 7699(1)  | 10(1)          |
| N(2)  | 7175(1) | 2382(1) | 7266(1)  | 12(1)          |
| C(19) | 6575(1) | 2845(1) | 9720(1)  | 10(1)          |
| C(11) | 4778(1) | 670(1)  | 10520(1) | 16(1)          |
| C(9)  | 3140(1) | 1063(1) | 9793(1)  | 14(1)          |
| C(7)  | 5232(1) | 1498(1) | 9692(1)  | 10(1)          |
| C(40) | 7355(1) | 5143(1) | 8949(1)  | 23(1)          |
| C(38) | 6720(1) | 4138(1) | 8283(1)  | 16(1)          |
| C(23) | 6118(1) | 3601(1) | 10598(1) | 17(1)          |
| C(26) | 2821(1) | 2720(1) | 9014(1)  | 11(1)          |
| C(2)  | 4627(1) | 1100(1) | 8179(1)  | 12(1)          |
| C(5)  | 2893(1) | 1364(1) | 7194(1)  | 18(1)          |
| C(3)  | 4733(1) | 732(1)  | 7600(1)  | 17(1)          |
| C(8)  | 3981(1) | 1504(1) | 9480(1)  | 10(1)          |
| C(37) | 5602(1) | 4066(1) | 8586(1)  | 12(1)          |
| C(24) | 5810(1) | 3019(1) | 10202(1) | 14(1)          |
| C(41) | 6257(1) | 5069(1) | 9257(1)  | 20(1)          |
| C(32) | 3464(1) | 3330(1) | 7094(1)  | 15(1)          |
| C(29) | 1393(1) | 4012(1) | 9169(1)  | 18(1)          |
| C(36) | 3908(1) | 4540(1) | 7491(1)  | 14(1)          |
| C(10) | 3532(1) | 648(1)  | 10305(1) | 16(1)          |
| C(31) | 3960(1) | 3777(1) | 7568(1)  | 11(1)          |
| C(1)  | 3646(1) | 1625(1) | 8256(1)  | 11(1)          |
| C(25) | 3137(1) | 3388(1) | 8736(1)  | 11(1)          |
| C(42) | 5379(1) | 4535(1) | 9077(1)  | 15(1)          |
| C(35) | 3361(1) | 4847(1) | 6958(1)  | 16(1)          |

|       |         |         |          |       |
|-------|---------|---------|----------|-------|
| C(34) | 2860(1) | 4396(1) | 6492(1)  | 18(1) |
| C(48) | 9211(1) | 1250(1) | 7332(1)  | 18(1) |
| C(39) | 7586(1) | 4677(1) | 8461(1)  | 22(1) |
| C(22) | 7180(1) | 4015(1) | 10516(1) | 17(1) |
| C(47) | 9398(1) | 2676(1) | 8118(1)  | 20(1) |
| C(12) | 5632(1) | 1087(1) | 10210(1) | 14(1) |
| C(21) | 7937(1) | 3854(1) | 10030(1) | 16(1) |
| C(27) | 1799(1) | 2734(1) | 9400(1)  | 15(1) |
| C(30) | 2408(1) | 4022(1) | 8793(1)  | 16(1) |
| C(6)  | 2795(1) | 1741(1) | 7735(1)  | 14(1) |
| C(44) | 6443(1) | 3704(1) | 6516(1)  | 18(1) |
| C(15) | 8933(1) | 584(1)  | 8829(1)  | 15(1) |
| C(13) | 7663(1) | 1545(1) | 9255(1)  | 10(1) |
| C(17) | 9528(1) | 1108(1) | 9814(1)  | 18(1) |
| C(20) | 7635(1) | 3275(1) | 9633(1)  | 13(1) |
| C(4)  | 3891(1) | 860(1)  | 7122(1)  | 20(1) |
| C(33) | 2914(1) | 3636(1) | 6562(1)  | 19(1) |
| C(18) | 8499(1) | 1573(1) | 9770(1)  | 14(1) |
| C(16) | 9745(1) | 611(1)  | 9344(1)  | 17(1) |
| C(28) | 1109(1) | 3368(1) | 9481(1)  | 18(1) |
| C(43) | 5414(1) | 2164(1) | 6158(1)  | 20(1) |
| C(14) | 7895(1) | 1047(1) | 8785(1)  | 12(1) |
| C(46) | 9308(1) | 2714(1) | 6665(1)  | 18(1) |
| C(45) | 8287(1) | 2526(1) | 6158(1)  | 17(1) |
| B(1)  | 3609(1) | 1998(1) | 8894(1)  | 10(1) |

---

Table S21. Bond lengths [ $\text{\AA}$ ] and angles [ $^\circ$ ] for **6b**.

---

|             |            |
|-------------|------------|
| Fe(1)-N(1)  | 1.6610(7)  |
| Fe(1)-C(1)  | 2.1542(9)  |
| Fe(1)-P(1)  | 2.2026(3)  |
| Fe(1)-C(2)  | 2.2041(9)  |
| Fe(1)-P(2)  | 2.2264(3)  |
| Fe(1)-B(1)  | 2.4242(10) |
| P(1)-C(7)   | 1.8265(9)  |
| P(1)-C(19)  | 1.8356(9)  |
| P(1)-C(13)  | 1.8409(9)  |
| P(2)-C(25)  | 1.8208(9)  |
| P(2)-C(37)  | 1.8363(10) |
| P(2)-C(31)  | 1.8442(9)  |
| Si(1)-N(2)  | 1.7933(8)  |
| Si(1)-C(43) | 1.8556(12) |
| Si(1)-C(44) | 1.8608(11) |
| Si(1)-C(45) | 1.8702(10) |
| Si(2)-N(2)  | 1.8001(8)  |
| Si(2)-C(47) | 1.8512(11) |
| Si(2)-C(48) | 1.8593(11) |
| Si(2)-C(46) | 1.8718(10) |
| N(1)-N(2)   | 1.3193(10) |
| C(19)-C(24) | 1.3947(12) |
| C(19)-C(20) | 1.3999(13) |
| C(11)-C(12) | 1.3866(14) |
| C(11)-C(10) | 1.3950(15) |
| C(11)-H(11) | 0.9500     |
| C(9)-C(10)  | 1.3930(14) |
| C(9)-C(8)   | 1.4047(12) |
| C(9)-H(9)   | 0.9500     |
| C(7)-C(8)   | 1.3980(12) |
| C(7)-C(12)  | 1.4009(12) |
| C(40)-C(41) | 1.3860(17) |
| C(40)-C(39) | 1.3883(17) |
| C(40)-H(40) | 0.9500     |

|             |            |
|-------------|------------|
| C(38)-C(39) | 1.3923(15) |
| C(38)-C(37) | 1.4000(13) |
| C(38)-H(38) | 0.9500     |
| C(23)-C(22) | 1.3836(15) |
| C(23)-C(24) | 1.3936(14) |
| C(23)-H(23) | 0.9500     |
| C(26)-C(25) | 1.4059(13) |
| C(26)-C(27) | 1.4086(12) |
| C(26)-B(1)  | 1.5895(14) |
| C(2)-C(3)   | 1.4342(13) |
| C(2)-C(1)   | 1.4356(13) |
| C(2)-H(2)   | 0.951(14)  |
| C(5)-C(6)   | 1.3680(14) |
| C(5)-C(4)   | 1.4218(17) |
| C(5)-H(5)   | 0.974(17)  |
| C(3)-C(4)   | 1.3641(16) |
| C(3)-H(3)   | 0.942(17)  |
| C(8)-B(1)   | 1.5927(13) |
| C(37)-C(42) | 1.3942(13) |
| C(24)-H(24) | 0.9500     |
| C(41)-C(42) | 1.3967(15) |
| C(41)-H(41) | 0.9500     |
| C(32)-C(33) | 1.3886(14) |
| C(32)-C(31) | 1.3986(13) |
| C(32)-H(32) | 0.9500     |
| C(29)-C(30) | 1.3895(13) |
| C(29)-C(28) | 1.3940(16) |
| C(29)-H(29) | 0.9500     |
| C(36)-C(35) | 1.3914(13) |
| C(36)-C(31) | 1.3985(13) |
| C(36)-H(36) | 0.9500     |
| C(10)-H(10) | 0.9500     |
| C(1)-C(6)   | 1.4365(13) |
| C(1)-B(1)   | 1.5450(13) |
| C(25)-C(30) | 1.4015(13) |
| C(42)-H(42) | 0.9500     |

|              |            |
|--------------|------------|
| C(35)-C(34)  | 1.3906(14) |
| C(35)-H(35)  | 0.9500     |
| C(34)-C(33)  | 1.3916(15) |
| C(34)-H(34)  | 0.9500     |
| C(48)-H(48A) | 0.9800     |
| C(48)-H(48B) | 0.9800     |
| C(48)-H(48C) | 0.9800     |
| C(39)-H(39)  | 0.9500     |
| C(22)-C(21)  | 1.3911(14) |
| C(22)-H(22)  | 0.9500     |
| C(47)-H(47A) | 0.9800     |
| C(47)-H(47B) | 0.9800     |
| C(47)-H(47C) | 0.9800     |
| C(12)-H(12)  | 0.9500     |
| C(21)-C(20)  | 1.3888(13) |
| C(21)-H(21)  | 0.9500     |
| C(27)-C(28)  | 1.3870(14) |
| C(27)-H(27)  | 0.9500     |
| C(30)-H(30)  | 0.9500     |
| C(6)-H(6)    | 0.944(14)  |
| C(44)-H(44A) | 0.9800     |
| C(44)-H(44B) | 0.9800     |
| C(44)-H(44C) | 0.9800     |
| C(15)-C(16)  | 1.3853(14) |
| C(15)-C(14)  | 1.3952(13) |
| C(15)-H(15)  | 0.9500     |
| C(13)-C(14)  | 1.3956(13) |
| C(13)-C(18)  | 1.4021(13) |
| C(17)-C(18)  | 1.3901(14) |
| C(17)-C(16)  | 1.3920(15) |
| C(17)-H(17)  | 0.9500     |
| C(20)-H(20)  | 0.9500     |
| C(4)-H(4)    | 0.945(16)  |
| C(33)-H(33)  | 0.9500     |
| C(18)-H(18)  | 0.9500     |
| C(16)-H(16)  | 0.9500     |



|                  |             |
|------------------|-------------|
| C(28)-H(28)      | 0.9500      |
| C(43)-H(43A)     | 0.9800      |
| C(43)-H(43B)     | 0.9800      |
| C(43)-H(43C)     | 0.9800      |
| C(14)-H(14)      | 0.9500      |
| C(46)-C(45)      | 1.5545(15)  |
| C(46)-H(46A)     | 0.9900      |
| C(46)-H(46B)     | 0.9900      |
| C(45)-H(45A)     | 0.9900      |
| C(45)-H(45B)     | 0.9900      |
|                  |             |
| N(1)-Fe(1)-C(1)  | 127.17(4)   |
| N(1)-Fe(1)-P(1)  | 117.30(3)   |
| C(1)-Fe(1)-P(1)  | 104.26(2)   |
| N(1)-Fe(1)-C(2)  | 103.97(4)   |
| C(1)-Fe(1)-C(2)  | 38.44(3)    |
| P(1)-Fe(1)-C(2)  | 94.92(3)    |
| N(1)-Fe(1)-P(2)  | 103.46(3)   |
| C(1)-Fe(1)-P(2)  | 96.38(3)    |
| P(1)-Fe(1)-P(2)  | 103.657(10) |
| C(2)-Fe(1)-P(2)  | 134.58(3)   |
| N(1)-Fe(1)-B(1)  | 165.75(4)   |
| C(1)-Fe(1)-B(1)  | 38.88(3)    |
| P(1)-Fe(1)-B(1)  | 74.99(2)    |
| C(2)-Fe(1)-B(1)  | 66.23(3)    |
| P(2)-Fe(1)-B(1)  | 79.03(3)    |
| C(7)-P(1)-C(19)  | 101.75(4)   |
| C(7)-P(1)-C(13)  | 100.32(4)   |
| C(19)-P(1)-C(13) | 101.29(4)   |
| C(7)-P(1)-Fe(1)  | 113.59(3)   |
| C(19)-P(1)-Fe(1) | 122.04(3)   |
| C(13)-P(1)-Fe(1) | 114.82(3)   |
| C(25)-P(2)-C(37) | 107.38(4)   |
| C(25)-P(2)-C(31) | 100.25(4)   |
| C(37)-P(2)-C(31) | 99.51(4)    |
| C(25)-P(2)-Fe(1) | 113.75(3)   |

|                   |            |
|-------------------|------------|
| C(37)-P(2)-Fe(1)  | 114.71(3)  |
| C(31)-P(2)-Fe(1)  | 119.29(3)  |
| N(2)-Si(1)-C(43)  | 111.39(5)  |
| N(2)-Si(1)-C(44)  | 109.80(4)  |
| C(43)-Si(1)-C(44) | 112.84(5)  |
| N(2)-Si(1)-C(45)  | 97.13(4)   |
| C(43)-Si(1)-C(45) | 115.37(5)  |
| C(44)-Si(1)-C(45) | 109.20(5)  |
| N(2)-Si(2)-C(47)  | 110.28(4)  |
| N(2)-Si(2)-C(48)  | 110.06(5)  |
| C(47)-Si(2)-C(48) | 113.63(5)  |
| N(2)-Si(2)-C(46)  | 97.07(4)   |
| C(47)-Si(2)-C(46) | 115.68(5)  |
| C(48)-Si(2)-C(46) | 108.88(5)  |
| N(2)-N(1)-Fe(1)   | 175.62(7)  |
| N(1)-N(2)-Si(1)   | 123.53(6)  |
| N(1)-N(2)-Si(2)   | 123.82(6)  |
| Si(1)-N(2)-Si(2)  | 112.62(4)  |
| C(24)-C(19)-C(20) | 118.85(8)  |
| C(24)-C(19)-P(1)  | 120.46(7)  |
| C(20)-C(19)-P(1)  | 120.69(6)  |
| C(12)-C(11)-C(10) | 119.77(9)  |
| C(12)-C(11)-H(11) | 120.1      |
| C(10)-C(11)-H(11) | 120.1      |
| C(10)-C(9)-C(8)   | 121.28(9)  |
| C(10)-C(9)-H(9)   | 119.4      |
| C(8)-C(9)-H(9)    | 119.4      |
| C(8)-C(7)-C(12)   | 121.46(8)  |
| C(8)-C(7)-P(1)    | 111.26(6)  |
| C(12)-C(7)-P(1)   | 127.28(7)  |
| C(41)-C(40)-C(39) | 119.64(10) |
| C(41)-C(40)-H(40) | 120.2      |
| C(39)-C(40)-H(40) | 120.2      |
| C(39)-C(38)-C(37) | 120.71(10) |
| C(39)-C(38)-H(38) | 119.6      |
| C(37)-C(38)-H(38) | 119.6      |

|                   |            |
|-------------------|------------|
| C(22)-C(23)-C(24) | 120.47(9)  |
| C(22)-C(23)-H(23) | 119.8      |
| C(24)-C(23)-H(23) | 119.8      |
| C(25)-C(26)-C(27) | 116.69(8)  |
| C(25)-C(26)-B(1)  | 120.22(7)  |
| C(27)-C(26)-B(1)  | 123.09(8)  |
| C(3)-C(2)-C(1)    | 120.06(9)  |
| C(3)-C(2)-Fe(1)   | 117.65(7)  |
| C(1)-C(2)-Fe(1)   | 68.89(5)   |
| C(3)-C(2)-H(2)    | 118.8(8)   |
| C(1)-C(2)-H(2)    | 117.6(8)   |
| Fe(1)-C(2)-H(2)   | 100.5(9)   |
| C(6)-C(5)-C(4)    | 120.36(9)  |
| C(6)-C(5)-H(5)    | 120.4(10)  |
| C(4)-C(5)-H(5)    | 119.3(10)  |
| C(4)-C(3)-C(2)    | 120.70(10) |
| C(4)-C(3)-H(3)    | 121.3(10)  |
| C(2)-C(3)-H(3)    | 117.8(10)  |
| C(7)-C(8)-C(9)    | 117.60(8)  |
| C(7)-C(8)-B(1)    | 117.92(7)  |
| C(9)-C(8)-B(1)    | 124.48(8)  |
| C(42)-C(37)-C(38) | 118.76(9)  |
| C(42)-C(37)-P(2)  | 125.29(7)  |
| C(38)-C(37)-P(2)  | 115.95(7)  |
| C(23)-C(24)-C(19) | 120.32(9)  |
| C(23)-C(24)-H(24) | 119.8      |
| C(19)-C(24)-H(24) | 119.8      |
| C(40)-C(41)-C(42) | 120.53(10) |
| C(40)-C(41)-H(41) | 119.7      |
| C(42)-C(41)-H(41) | 119.7      |
| C(33)-C(32)-C(31) | 120.82(9)  |
| C(33)-C(32)-H(32) | 119.6      |
| C(31)-C(32)-H(32) | 119.6      |
| C(30)-C(29)-C(28) | 119.34(9)  |
| C(30)-C(29)-H(29) | 120.3      |
| C(28)-C(29)-H(29) | 120.3      |

|                     |            |
|---------------------|------------|
| C(35)-C(36)-C(31)   | 120.73(9)  |
| C(35)-C(36)-H(36)   | 119.6      |
| C(31)-C(36)-H(36)   | 119.6      |
| C(9)-C(10)-C(11)    | 120.01(9)  |
| C(9)-C(10)-H(10)    | 120.0      |
| C(11)-C(10)-H(10)   | 120.0      |
| C(36)-C(31)-C(32)   | 118.48(8)  |
| C(36)-C(31)-P(2)    | 122.58(7)  |
| C(32)-C(31)-P(2)    | 118.74(7)  |
| C(2)-C(1)-C(6)      | 116.60(8)  |
| C(2)-C(1)-B(1)      | 116.49(8)  |
| C(6)-C(1)-B(1)      | 126.90(8)  |
| C(2)-C(1)-Fe(1)     | 72.66(5)   |
| C(6)-C(1)-Fe(1)     | 116.76(6)  |
| B(1)-C(1)-Fe(1)     | 80.05(5)   |
| C(30)-C(25)-C(26)   | 121.76(8)  |
| C(30)-C(25)-P(2)    | 124.20(7)  |
| C(26)-C(25)-P(2)    | 114.03(7)  |
| C(37)-C(42)-C(41)   | 120.26(10) |
| C(37)-C(42)-H(42)   | 119.9      |
| C(41)-C(42)-H(42)   | 119.9      |
| C(34)-C(35)-C(36)   | 120.18(9)  |
| C(34)-C(35)-H(35)   | 119.9      |
| C(36)-C(35)-H(35)   | 119.9      |
| C(35)-C(34)-C(33)   | 119.58(9)  |
| C(35)-C(34)-H(34)   | 120.2      |
| C(33)-C(34)-H(34)   | 120.2      |
| Si(2)-C(48)-H(48A)  | 109.5      |
| Si(2)-C(48)-H(48B)  | 109.5      |
| H(48A)-C(48)-H(48B) | 109.5      |
| Si(2)-C(48)-H(48C)  | 109.5      |
| H(48A)-C(48)-H(48C) | 109.5      |
| H(48B)-C(48)-H(48C) | 109.5      |
| C(40)-C(39)-C(38)   | 120.09(10) |
| C(40)-C(39)-H(39)   | 120.0      |
| C(38)-C(39)-H(39)   | 120.0      |

|                     |           |
|---------------------|-----------|
| C(23)-C(22)-C(21)   | 119.62(9) |
| C(23)-C(22)-H(22)   | 120.2     |
| C(21)-C(22)-H(22)   | 120.2     |
| Si(2)-C(47)-H(47A)  | 109.5     |
| Si(2)-C(47)-H(47B)  | 109.5     |
| H(47A)-C(47)-H(47B) | 109.5     |
| Si(2)-C(47)-H(47C)  | 109.5     |
| H(47A)-C(47)-H(47C) | 109.5     |
| H(47B)-C(47)-H(47C) | 109.5     |
| C(11)-C(12)-C(7)    | 119.83(9) |
| C(11)-C(12)-H(12)   | 120.1     |
| C(7)-C(12)-H(12)    | 120.1     |
| C(20)-C(21)-C(22)   | 120.22(9) |
| C(20)-C(21)-H(21)   | 119.9     |
| C(22)-C(21)-H(21)   | 119.9     |
| C(28)-C(27)-C(26)   | 121.64(9) |
| C(28)-C(27)-H(27)   | 119.2     |
| C(26)-C(27)-H(27)   | 119.2     |
| C(29)-C(30)-C(25)   | 119.81(9) |
| C(29)-C(30)-H(30)   | 120.1     |
| C(25)-C(30)-H(30)   | 120.1     |
| C(5)-C(6)-C(1)      | 122.11(9) |
| C(5)-C(6)-H(6)      | 120.4(9)  |
| C(1)-C(6)-H(6)      | 117.4(9)  |
| Si(1)-C(44)-H(44A)  | 109.5     |
| Si(1)-C(44)-H(44B)  | 109.5     |
| H(44A)-C(44)-H(44B) | 109.5     |
| Si(1)-C(44)-H(44C)  | 109.5     |
| H(44A)-C(44)-H(44C) | 109.5     |
| H(44B)-C(44)-H(44C) | 109.5     |
| C(16)-C(15)-C(14)   | 120.27(9) |
| C(16)-C(15)-H(15)   | 119.9     |
| C(14)-C(15)-H(15)   | 119.9     |
| C(14)-C(13)-C(18)   | 118.60(8) |
| C(14)-C(13)-P(1)    | 118.33(7) |
| C(18)-C(13)-P(1)    | 122.76(7) |

|                     |           |
|---------------------|-----------|
| C(18)-C(17)-C(16)   | 120.23(9) |
| C(18)-C(17)-H(17)   | 119.9     |
| C(16)-C(17)-H(17)   | 119.9     |
| C(21)-C(20)-C(19)   | 120.50(8) |
| C(21)-C(20)-H(20)   | 119.8     |
| C(19)-C(20)-H(20)   | 119.8     |
| C(3)-C(4)-C(5)      | 120.10(9) |
| C(3)-C(4)-H(4)      | 118.1(10) |
| C(5)-C(4)-H(4)      | 121.8(10) |
| C(32)-C(33)-C(34)   | 120.21(9) |
| C(32)-C(33)-H(33)   | 119.9     |
| C(34)-C(33)-H(33)   | 119.9     |
| C(17)-C(18)-C(13)   | 120.60(9) |
| C(17)-C(18)-H(18)   | 119.7     |
| C(13)-C(18)-H(18)   | 119.7     |
| C(15)-C(16)-C(17)   | 119.67(9) |
| C(15)-C(16)-H(16)   | 120.2     |
| C(17)-C(16)-H(16)   | 120.2     |
| C(27)-C(28)-C(29)   | 120.51(9) |
| C(27)-C(28)-H(28)   | 119.7     |
| C(29)-C(28)-H(28)   | 119.7     |
| Si(1)-C(43)-H(43A)  | 109.5     |
| Si(1)-C(43)-H(43B)  | 109.5     |
| H(43A)-C(43)-H(43B) | 109.5     |
| Si(1)-C(43)-H(43C)  | 109.5     |
| H(43A)-C(43)-H(43C) | 109.5     |
| H(43B)-C(43)-H(43C) | 109.5     |
| C(15)-C(14)-C(13)   | 120.63(8) |
| C(15)-C(14)-H(14)   | 119.7     |
| C(13)-C(14)-H(14)   | 119.7     |
| C(45)-C(46)-Si(2)   | 106.28(7) |
| C(45)-C(46)-H(46A)  | 110.5     |
| Si(2)-C(46)-H(46A)  | 110.5     |
| C(45)-C(46)-H(46B)  | 110.5     |
| Si(2)-C(46)-H(46B)  | 110.5     |
| H(46A)-C(46)-H(46B) | 108.7     |

|                     |           |
|---------------------|-----------|
| C(46)-C(45)-Si(1)   | 106.54(6) |
| C(46)-C(45)-H(45A)  | 110.4     |
| Si(1)-C(45)-H(45A)  | 110.4     |
| C(46)-C(45)-H(45B)  | 110.4     |
| Si(1)-C(45)-H(45B)  | 110.4     |
| H(45A)-C(45)-H(45B) | 108.6     |
| C(1)-B(1)-C(26)     | 123.09(8) |
| C(1)-B(1)-C(8)      | 116.86(8) |
| C(26)-B(1)-C(8)     | 116.79(7) |
| C(1)-B(1)-Fe(1)     | 61.07(4)  |
| C(26)-B(1)-Fe(1)    | 112.86(6) |
| C(8)-B(1)-Fe(1)     | 111.82(6) |

---

Symmetry transformations used to generate equivalent atoms:

Table S22. Crystal data and structure refinement for **7**.

|                                   |                                                                                    |                              |
|-----------------------------------|------------------------------------------------------------------------------------|------------------------------|
| Identification code               | <b>7</b>                                                                           |                              |
| Empirical formula                 | C <sub>42</sub> H <sub>65</sub> B Fe N <sub>2</sub> P <sub>2</sub> Si <sub>3</sub> |                              |
| Formula weight                    | 810.83                                                                             |                              |
| Temperature                       | 100(2) K                                                                           |                              |
| Wavelength                        | 0.71073 Å                                                                          |                              |
| Crystal system                    | Triclinic                                                                          |                              |
| Space group                       | P-1                                                                                |                              |
| Unit cell dimensions              | a = 10.167(15) Å                                                                   | $\alpha = 99.79(5)^\circ$ .  |
|                                   | b = 12.843(12) Å                                                                   | $\beta = 95.23(5)^\circ$ .   |
|                                   | c = 18.21(3) Å                                                                     | $\gamma = 101.42(5)^\circ$ . |
| Volume                            | 2277(5) Å <sup>3</sup>                                                             |                              |
| Z                                 | 2                                                                                  |                              |
| Density (calculated)              | 1.183 Mg/m <sup>3</sup>                                                            |                              |
| Absorption coefficient            | 0.510 mm <sup>-1</sup>                                                             |                              |
| F(000)                            | 868                                                                                |                              |
| Crystal size                      | 0.05 x 0.05 x 0.04 mm <sup>3</sup>                                                 |                              |
| Theta range for data collection   | 1.65 to 24.55°.                                                                    |                              |
| Index ranges                      | -11 ≤ h ≤ 11, -14 ≤ k ≤ 14, -20 ≤ l ≤ 21                                           |                              |
| Reflections collected             | 11316                                                                              |                              |
| Independent reflections           | 5912 [R(int) = 0.0330]                                                             |                              |
| Completeness to theta = 24.55°    | 77.8 %                                                                             |                              |
| Absorption correction             | None                                                                               |                              |
| Refinement method                 | Full-matrix least-squares on F <sup>2</sup>                                        |                              |
| Data / restraints / parameters    | 5912 / 0 / 485                                                                     |                              |
| Goodness-of-fit on F <sup>2</sup> | 1.068                                                                              |                              |
| Final R indices [I > 2σ(I)]       | R1 = 0.0543, wR2 = 0.1547                                                          |                              |
| R indices (all data)              | R1 = 0.0648, wR2 = 0.1615                                                          |                              |
| Largest diff. peak and hole       | 0.778 and -0.295 e.Å <sup>-3</sup>                                                 |                              |



Table S23. Atomic coordinates ( $\times 10^4$ ) and equivalent isotropic displacement parameters ( $\text{\AA}^2 \times 10^3$ ) for 7.  $U(\text{eq})$  is defined as one third of the trace of the orthogonalized  $U^{\text{ij}}$  tensor.

|       | x       | y        | z       | $U(\text{eq})$ |
|-------|---------|----------|---------|----------------|
| Fe(1) | 2867(1) | 1679(1)  | 2298(1) | 37(1)          |
| P(2)  | 2832(1) | -308(1)  | 1958(1) | 38(1)          |
| P(1)  | 1389(1) | 2042(1)  | 3238(1) | 42(1)          |
| Si(3) | 2940(1) | 4652(1)  | 1522(1) | 46(1)          |
| Si(2) | 2068(1) | 2651(1)  | 393(1)  | 46(1)          |
| Si(1) | 5416(1) | 2811(1)  | 1638(1) | 47(1)          |
| N(2)  | 2976(3) | 3288(2)  | 1262(2) | 43(1)          |
| C(20) | 4923(3) | 169(3)   | 3166(2) | 37(1)          |
| C(10) | 1645(4) | -890(3)  | 4381(2) | 47(1)          |
| C(13) | 1795(4) | 3300(3)  | 3979(3) | 52(1)          |
| N(1)  | 3713(3) | 2662(2)  | 1710(2) | 41(1)          |
| C(7)  | 1527(3) | 917(3)   | 3727(2) | 40(1)          |
| C(30) | 3900(5) | -136(4)  | 640(3)  | 61(1)          |
| C(9)  | 2793(4) | -293(3)  | 4176(2) | 44(1)          |
| C(27) | 130(4)  | -1521(3) | 1710(2) | 48(1)          |
| C(28) | 2733(4) | -803(3)  | 924(2)  | 45(1)          |
| C(21) | 6061(4) | -81(3)   | 3556(2) | 46(1)          |
| C(29) | 2571(4) | -2011(3) | 601(2)  | 52(1)          |
| C(22) | 6640(4) | -934(3)  | 3255(3) | 50(1)          |
| C(19) | 4413(3) | -494(3)  | 2453(2) | 38(1)          |
| C(8)  | 2803(3) | 606(3)   | 3827(2) | 38(1)          |
| C(6)  | 5129(4) | 2005(3)  | 5014(3) | 55(1)          |
| C(25) | 1453(3) | -1273(3) | 2263(2) | 43(1)          |
| C(38) | 2827(5) | 5052(4)  | 2536(3) | 62(1)          |
| C(24) | 5025(4) | -1322(3) | 2152(3) | 47(1)          |
| C(12) | 369(4)  | 330(3)   | 3942(2) | 46(1)          |
| C(23) | 6131(4) | -1543(3) | 2553(3) | 49(1)          |
| C(5)  | 6032(6) | 2739(4)  | 5596(3) | 68(2)          |
| C(16) | -448(4) | 1924(3)  | 2928(3) | 53(1)          |
| C(37) | 4376(4) | 5602(4)  | 1257(3) | 64(1)          |
| C(36) | 7521(4) | 4684(4)  | 1737(3) | 56(1)          |

|       |          |          |         |       |
|-------|----------|----------|---------|-------|
| C(11) | 414(4)   | -595(3)  | 4250(2) | 49(1) |
| C(4)  | 7128(5)  | 3418(4)  | 5405(3) | 71(2) |
| C(35) | 8359(5)  | 5677(4)  | 2085(3) | 67(1) |
| C(15) | 1063(5)  | 3169(4)  | 4663(3) | 76(1) |
| C(33) | 7211(5)  | 5643(4)  | 3171(3) | 67(1) |
| C(34) | 8196(5)  | 6140(4)  | 2794(3) | 72(2) |
| C(26) | 1836(4)  | -2303(3) | 2447(2) | 50(1) |
| C(2)  | 6418(4)  | 2647(3)  | 4097(3) | 52(1) |
| C(18) | -1040(4) | 887(4)   | 2349(3) | 56(1) |
| C(17) | -634(5)  | 2905(4)  | 2576(3) | 66(1) |
| C(42) | 3116(4)  | 2169(4)  | -326(3) | 58(1) |
| C(14) | 3293(4)  | 3725(3)  | 4221(3) | 57(1) |
| C(41) | 722(4)   | 1492(3)  | 510(3)  | 56(1) |
| C(1)  | 5281(4)  | 1946(3)  | 4260(2) | 44(1) |
| C(40) | 1371(4)  | 3833(3)  | 141(3)  | 54(1) |
| C(39) | 1348(4)  | 4618(3)  | 886(2)  | 52(1) |
| C(31) | 6511(4)  | 4155(3)  | 2106(3) | 51(1) |
| B(1)  | 4241(4)  | 1134(3)  | 3573(2) | 37(1) |
| C(3)  | 7323(5)  | 3395(3)  | 4672(3) | 65(1) |
| C(32) | 6380(4)  | 4641(4)  | 2821(3) | 54(1) |

---

Table S24. Bond lengths [ $\text{\AA}$ ] and angles [ $^\circ$ ] for **7**.

---

|              |          |
|--------------|----------|
| Fe(1)-N(1)   | 1.918(4) |
| Fe(1)-P(1)   | 2.424(3) |
| Fe(1)-P(2)   | 2.514(3) |
| Fe(1)-B(1)   | 2.859(5) |
| Fe(1)-H(103) | 1.77(4)  |
| P(2)-C(19)   | 1.846(4) |
| P(2)-C(28)   | 1.869(5) |
| P(2)-C(25)   | 1.870(4) |
| P(1)-C(7)    | 1.842(4) |
| P(1)-C(13)   | 1.870(5) |
| P(1)-C(16)   | 1.871(5) |
| Si(3)-N(2)   | 1.743(4) |
| Si(3)-C(38)  | 1.851(6) |
| Si(3)-C(37)  | 1.865(5) |
| Si(3)-C(39)  | 1.892(4) |
| Si(2)-N(2)   | 1.737(4) |
| Si(2)-C(42)  | 1.864(5) |
| Si(2)-C(41)  | 1.868(5) |
| Si(2)-C(40)  | 1.903(4) |
| Si(1)-N(1)   | 1.723(4) |
| Si(1)-C(31)  | 1.874(5) |
| Si(1)-H(101) | 1.33(3)  |
| Si(1)-H(102) | 1.47(6)  |
| N(2)-N(1)    | 1.492(4) |
| C(20)-C(19)  | 1.416(6) |
| C(20)-C(21)  | 1.422(5) |
| C(20)-B(1)   | 1.640(5) |
| C(10)-C(9)   | 1.383(6) |
| C(10)-C(11)  | 1.390(6) |
| C(10)-H(10)  | 0.9500   |
| C(13)-C(14)  | 1.510(6) |
| C(13)-C(15)  | 1.523(7) |
| C(13)-H(13)  | 1.0000   |
| C(7)-C(12)   | 1.394(6) |

|              |          |
|--------------|----------|
| C(7)-C(8)    | 1.437(5) |
| C(30)-C(28)  | 1.507(6) |
| C(30)-H(30A) | 0.9800   |
| C(30)-H(30B) | 0.9800   |
| C(30)-H(30C) | 0.9800   |
| C(9)-C(8)    | 1.407(5) |
| C(9)-H(9)    | 0.9500   |
| C(27)-C(25)  | 1.549(5) |
| C(27)-H(27A) | 0.9800   |
| C(27)-H(27B) | 0.9800   |
| C(27)-H(27C) | 0.9800   |
| C(28)-C(29)  | 1.533(6) |
| C(28)-H(28)  | 1.0000   |
| C(21)-C(22)  | 1.399(6) |
| C(21)-H(21)  | 0.9500   |
| C(29)-H(29A) | 0.9800   |
| C(29)-H(29B) | 0.9800   |
| C(29)-H(29C) | 0.9800   |
| C(22)-C(23)  | 1.375(6) |
| C(22)-H(22)  | 0.9500   |
| C(19)-C(24)  | 1.395(5) |
| C(8)-B(1)    | 1.627(6) |
| C(6)-C(1)    | 1.387(7) |
| C(6)-C(5)    | 1.413(6) |
| C(6)-H(6)    | 0.9500   |
| C(25)-C(26)  | 1.531(5) |
| C(25)-H(25)  | 1.0000   |
| C(38)-H(38A) | 0.9800   |
| C(38)-H(38B) | 0.9800   |
| C(38)-H(38C) | 0.9800   |
| C(24)-C(23)  | 1.388(5) |
| C(24)-H(24)  | 0.9500   |
| C(12)-C(11)  | 1.404(6) |
| C(12)-H(12)  | 0.9500   |
| C(23)-H(23)  | 0.9500   |
| C(5)-C(4)    | 1.384(8) |

|              |          |
|--------------|----------|
| C(5)-H(5)    | 0.9500   |
| C(16)-C(18)  | 1.528(6) |
| C(16)-C(17)  | 1.543(6) |
| C(16)-H(16)  | 1.0000   |
| C(37)-H(37A) | 0.9800   |
| C(37)-H(37B) | 0.9800   |
| C(37)-H(37C) | 0.9800   |
| C(36)-C(35)  | 1.397(7) |
| C(36)-C(31)  | 1.405(6) |
| C(36)-H(36)  | 0.9500   |
| C(11)-H(11)  | 0.9500   |
| C(4)-C(3)    | 1.363(8) |
| C(4)-H(4)    | 0.9500   |
| C(35)-C(34)  | 1.365(8) |
| C(35)-H(35)  | 0.9500   |
| C(15)-H(15A) | 0.9800   |
| C(15)-H(15B) | 0.9800   |
| C(15)-H(15C) | 0.9800   |
| C(33)-C(34)  | 1.380(8) |
| C(33)-C(32)  | 1.403(7) |
| C(33)-H(33)  | 0.9500   |
| C(34)-H(34)  | 0.9500   |
| C(26)-H(26A) | 0.9800   |
| C(26)-H(26B) | 0.9800   |
| C(26)-H(26C) | 0.9800   |
| C(2)-C(1)    | 1.407(6) |
| C(2)-C(3)    | 1.413(6) |
| C(2)-H(2)    | 0.9500   |
| C(18)-H(18A) | 0.9800   |
| C(18)-H(18B) | 0.9800   |
| C(18)-H(18C) | 0.9800   |
| C(17)-H(17A) | 0.9800   |
| C(17)-H(17B) | 0.9800   |
| C(17)-H(17C) | 0.9800   |
| C(42)-H(42A) | 0.9800   |
| C(42)-H(42B) | 0.9800   |

|                   |            |
|-------------------|------------|
| C(42)-H(42C)      | 0.9800     |
| C(14)-H(14A)      | 0.9800     |
| C(14)-H(14B)      | 0.9800     |
| C(14)-H(14C)      | 0.9800     |
| C(41)-H(41A)      | 0.9800     |
| C(41)-H(41B)      | 0.9800     |
| C(41)-H(41C)      | 0.9800     |
| C(1)-B(1)         | 1.628(6)   |
| C(40)-C(39)       | 1.551(7)   |
| C(40)-H(40A)      | 0.9900     |
| C(40)-H(40B)      | 0.9900     |
| C(39)-H(39A)      | 0.9900     |
| C(39)-H(39B)      | 0.9900     |
| C(31)-C(32)       | 1.374(7)   |
| B(1)-H(103)       | 1.20(4)    |
| C(3)-H(3)         | 0.9500     |
| C(32)-H(32)       | 0.9500     |
|                   |            |
| N(1)-Fe(1)-P(1)   | 127.08(11) |
| N(1)-Fe(1)-P(2)   | 120.31(12) |
| P(1)-Fe(1)-P(2)   | 111.54(6)  |
| N(1)-Fe(1)-B(1)   | 124.03(14) |
| P(1)-Fe(1)-B(1)   | 78.95(14)  |
| P(2)-Fe(1)-B(1)   | 73.66(11)  |
| N(1)-Fe(1)-H(103) | 111.7(13)  |
| P(1)-Fe(1)-H(103) | 83.0(12)   |
| P(2)-Fe(1)-H(103) | 83.3(13)   |
| B(1)-Fe(1)-H(103) | 13.1(13)   |
| C(19)-P(2)-C(28)  | 110.42(18) |
| C(19)-P(2)-C(25)  | 104.86(18) |
| C(28)-P(2)-C(25)  | 104.70(19) |
| C(19)-P(2)-Fe(1)  | 105.81(13) |
| C(28)-P(2)-Fe(1)  | 113.04(13) |
| C(25)-P(2)-Fe(1)  | 117.70(14) |
| C(7)-P(1)-C(13)   | 106.3(2)   |
| C(7)-P(1)-C(16)   | 107.42(19) |

|                     |            |
|---------------------|------------|
| C(13)-P(1)-C(16)    | 101.97(19) |
| C(7)-P(1)-Fe(1)     | 98.34(14)  |
| C(13)-P(1)-Fe(1)    | 122.41(16) |
| C(16)-P(1)-Fe(1)    | 119.05(18) |
| N(2)-Si(3)-C(38)    | 112.67(19) |
| N(2)-Si(3)-C(37)    | 114.3(2)   |
| C(38)-Si(3)-C(37)   | 109.4(2)   |
| N(2)-Si(3)-C(39)    | 97.15(17)  |
| C(38)-Si(3)-C(39)   | 114.2(2)   |
| C(37)-Si(3)-C(39)   | 108.7(2)   |
| N(2)-Si(2)-C(42)    | 114.6(2)   |
| N(2)-Si(2)-C(41)    | 109.8(2)   |
| C(42)-Si(2)-C(41)   | 109.6(2)   |
| N(2)-Si(2)-C(40)    | 98.72(18)  |
| C(42)-Si(2)-C(40)   | 110.7(2)   |
| C(41)-Si(2)-C(40)   | 113.2(2)   |
| N(1)-Si(1)-C(31)    | 115.76(18) |
| N(1)-Si(1)-H(101)   | 104.6(15)  |
| C(31)-Si(1)-H(101)  | 104.8(16)  |
| N(1)-Si(1)-H(102)   | 119(2)     |
| C(31)-Si(1)-H(102)  | 96(2)      |
| H(101)-Si(1)-H(102) | 116(3)     |
| N(1)-N(2)-Si(2)     | 119.5(2)   |
| N(1)-N(2)-Si(3)     | 125.8(2)   |
| Si(2)-N(2)-Si(3)    | 114.69(17) |
| C(19)-C(20)-C(21)   | 116.1(3)   |
| C(19)-C(20)-B(1)    | 124.4(3)   |
| C(21)-C(20)-B(1)    | 119.4(3)   |
| C(9)-C(10)-C(11)    | 119.3(4)   |
| C(9)-C(10)-H(10)    | 120.3      |
| C(11)-C(10)-H(10)   | 120.3      |
| C(14)-C(13)-C(15)   | 110.2(4)   |
| C(14)-C(13)-P(1)    | 113.4(3)   |
| C(15)-C(13)-P(1)    | 112.6(3)   |
| C(14)-C(13)-H(13)   | 106.7      |
| C(15)-C(13)-H(13)   | 106.7      |

|                     |            |
|---------------------|------------|
| P(1)-C(13)-H(13)    | 106.7      |
| N(2)-N(1)-Si(1)     | 115.8(2)   |
| N(2)-N(1)-Fe(1)     | 124.2(2)   |
| Si(1)-N(1)-Fe(1)    | 119.91(16) |
| C(12)-C(7)-C(8)     | 121.0(3)   |
| C(12)-C(7)-P(1)     | 119.4(3)   |
| C(8)-C(7)-P(1)      | 119.5(3)   |
| C(28)-C(30)-H(30A)  | 109.5      |
| C(28)-C(30)-H(30B)  | 109.5      |
| H(30A)-C(30)-H(30B) | 109.5      |
| C(28)-C(30)-H(30C)  | 109.5      |
| H(30A)-C(30)-H(30C) | 109.5      |
| H(30B)-C(30)-H(30C) | 109.5      |
| C(10)-C(9)-C(8)     | 124.0(3)   |
| C(10)-C(9)-H(9)     | 118.0      |
| C(8)-C(9)-H(9)      | 118.0      |
| C(25)-C(27)-H(27A)  | 109.5      |
| C(25)-C(27)-H(27B)  | 109.5      |
| H(27A)-C(27)-H(27B) | 109.5      |
| C(25)-C(27)-H(27C)  | 109.5      |
| H(27A)-C(27)-H(27C) | 109.5      |
| H(27B)-C(27)-H(27C) | 109.5      |
| C(30)-C(28)-C(29)   | 110.8(3)   |
| C(30)-C(28)-P(2)    | 108.5(3)   |
| C(29)-C(28)-P(2)    | 120.8(3)   |
| C(30)-C(28)-H(28)   | 105.2      |
| C(29)-C(28)-H(28)   | 105.2      |
| P(2)-C(28)-H(28)    | 105.2      |
| C(22)-C(21)-C(20)   | 122.0(4)   |
| C(22)-C(21)-H(21)   | 119.0      |
| C(20)-C(21)-H(21)   | 119.0      |
| C(28)-C(29)-H(29A)  | 109.5      |
| C(28)-C(29)-H(29B)  | 109.5      |
| H(29A)-C(29)-H(29B) | 109.5      |
| C(28)-C(29)-H(29C)  | 109.5      |
| H(29A)-C(29)-H(29C) | 109.5      |



|                     |          |
|---------------------|----------|
| H(29B)-C(29)-H(29C) | 109.5    |
| C(23)-C(22)-C(21)   | 120.1(3) |
| C(23)-C(22)-H(22)   | 120.0    |
| C(21)-C(22)-H(22)   | 120.0    |
| C(24)-C(19)-C(20)   | 121.2(3) |
| C(24)-C(19)-P(2)    | 120.3(3) |
| C(20)-C(19)-P(2)    | 118.4(3) |
| C(9)-C(8)-C(7)      | 115.3(3) |
| C(9)-C(8)-B(1)      | 116.0(3) |
| C(7)-C(8)-B(1)      | 128.6(3) |
| C(1)-C(6)-C(5)      | 123.0(5) |
| C(1)-C(6)-H(6)      | 118.5    |
| C(5)-C(6)-H(6)      | 118.5    |
| C(26)-C(25)-C(27)   | 112.3(3) |
| C(26)-C(25)-P(2)    | 115.3(3) |
| C(27)-C(25)-P(2)    | 111.5(3) |
| C(26)-C(25)-H(25)   | 105.6    |
| C(27)-C(25)-H(25)   | 105.6    |
| P(2)-C(25)-H(25)    | 105.6    |
| Si(3)-C(38)-H(38A)  | 109.5    |
| Si(3)-C(38)-H(38B)  | 109.5    |
| H(38A)-C(38)-H(38B) | 109.5    |
| Si(3)-C(38)-H(38C)  | 109.5    |
| H(38A)-C(38)-H(38C) | 109.5    |
| H(38B)-C(38)-H(38C) | 109.5    |
| C(23)-C(24)-C(19)   | 120.9(4) |
| C(23)-C(24)-H(24)   | 119.5    |
| C(19)-C(24)-H(24)   | 119.5    |
| C(7)-C(12)-C(11)    | 120.8(3) |
| C(7)-C(12)-H(12)    | 119.6    |
| C(11)-C(12)-H(12)   | 119.6    |
| C(22)-C(23)-C(24)   | 119.8(4) |
| C(22)-C(23)-H(23)   | 120.1    |
| C(24)-C(23)-H(23)   | 120.1    |
| C(4)-C(5)-C(6)      | 118.4(5) |
| C(4)-C(5)-H(5)      | 120.8    |

|                     |          |
|---------------------|----------|
| C(6)-C(5)-H(5)      | 120.8    |
| C(18)-C(16)-C(17)   | 108.9(4) |
| C(18)-C(16)-P(1)    | 111.4(3) |
| C(17)-C(16)-P(1)    | 109.6(3) |
| C(18)-C(16)-H(16)   | 109.0    |
| C(17)-C(16)-H(16)   | 109.0    |
| P(1)-C(16)-H(16)    | 109.0    |
| Si(3)-C(37)-H(37A)  | 109.5    |
| Si(3)-C(37)-H(37B)  | 109.5    |
| H(37A)-C(37)-H(37B) | 109.5    |
| Si(3)-C(37)-H(37C)  | 109.5    |
| H(37A)-C(37)-H(37C) | 109.5    |
| H(37B)-C(37)-H(37C) | 109.5    |
| C(35)-C(36)-C(31)   | 120.9(5) |
| C(35)-C(36)-H(36)   | 119.5    |
| C(31)-C(36)-H(36)   | 119.5    |
| C(10)-C(11)-C(12)   | 119.4(4) |
| C(10)-C(11)-H(11)   | 120.3    |
| C(12)-C(11)-H(11)   | 120.3    |
| C(3)-C(4)-C(5)      | 120.9(4) |
| C(3)-C(4)-H(4)      | 119.5    |
| C(5)-C(4)-H(4)      | 119.5    |
| C(34)-C(35)-C(36)   | 119.6(5) |
| C(34)-C(35)-H(35)   | 120.2    |
| C(36)-C(35)-H(35)   | 120.2    |
| C(13)-C(15)-H(15A)  | 109.5    |
| C(13)-C(15)-H(15B)  | 109.5    |
| H(15A)-C(15)-H(15B) | 109.5    |
| C(13)-C(15)-H(15C)  | 109.5    |
| H(15A)-C(15)-H(15C) | 109.5    |
| H(15B)-C(15)-H(15C) | 109.5    |
| C(34)-C(33)-C(32)   | 119.2(5) |
| C(34)-C(33)-H(33)   | 120.4    |
| C(32)-C(33)-H(33)   | 120.4    |
| C(35)-C(34)-C(33)   | 120.9(5) |
| C(35)-C(34)-H(34)   | 119.5    |

|                     |          |
|---------------------|----------|
| C(33)-C(34)-H(34)   | 119.5    |
| C(25)-C(26)-H(26A)  | 109.5    |
| C(25)-C(26)-H(26B)  | 109.5    |
| H(26A)-C(26)-H(26B) | 109.5    |
| C(25)-C(26)-H(26C)  | 109.5    |
| H(26A)-C(26)-H(26C) | 109.5    |
| H(26B)-C(26)-H(26C) | 109.5    |
| C(1)-C(2)-C(3)      | 121.4(5) |
| C(1)-C(2)-H(2)      | 119.3    |
| C(3)-C(2)-H(2)      | 119.3    |
| C(16)-C(18)-H(18A)  | 109.5    |
| C(16)-C(18)-H(18B)  | 109.5    |
| H(18A)-C(18)-H(18B) | 109.5    |
| C(16)-C(18)-H(18C)  | 109.5    |
| H(18A)-C(18)-H(18C) | 109.5    |
| H(18B)-C(18)-H(18C) | 109.5    |
| C(16)-C(17)-H(17A)  | 109.5    |
| C(16)-C(17)-H(17B)  | 109.5    |
| H(17A)-C(17)-H(17B) | 109.5    |
| C(16)-C(17)-H(17C)  | 109.5    |
| H(17A)-C(17)-H(17C) | 109.5    |
| H(17B)-C(17)-H(17C) | 109.5    |
| Si(2)-C(42)-H(42A)  | 109.5    |
| Si(2)-C(42)-H(42B)  | 109.5    |
| H(42A)-C(42)-H(42B) | 109.5    |
| Si(2)-C(42)-H(42C)  | 109.5    |
| H(42A)-C(42)-H(42C) | 109.5    |
| H(42B)-C(42)-H(42C) | 109.5    |
| C(13)-C(14)-H(14A)  | 109.5    |
| C(13)-C(14)-H(14B)  | 109.5    |
| H(14A)-C(14)-H(14B) | 109.5    |
| C(13)-C(14)-H(14C)  | 109.5    |
| H(14A)-C(14)-H(14C) | 109.5    |
| H(14B)-C(14)-H(14C) | 109.5    |
| Si(2)-C(41)-H(41A)  | 109.5    |
| Si(2)-C(41)-H(41B)  | 109.5    |

|                     |           |
|---------------------|-----------|
| H(41A)-C(41)-H(41B) | 109.5     |
| Si(2)-C(41)-H(41C)  | 109.5     |
| H(41A)-C(41)-H(41C) | 109.5     |
| H(41B)-C(41)-H(41C) | 109.5     |
| C(6)-C(1)-C(2)      | 116.3(4)  |
| C(6)-C(1)-B(1)      | 124.4(4)  |
| C(2)-C(1)-B(1)      | 119.3(4)  |
| C(39)-C(40)-Si(2)   | 107.6(3)  |
| C(39)-C(40)-H(40A)  | 110.2     |
| Si(2)-C(40)-H(40A)  | 110.2     |
| C(39)-C(40)-H(40B)  | 110.2     |
| Si(2)-C(40)-H(40B)  | 110.2     |
| H(40A)-C(40)-H(40B) | 108.5     |
| C(40)-C(39)-Si(3)   | 106.7(3)  |
| C(40)-C(39)-H(39A)  | 110.4     |
| Si(3)-C(39)-H(39A)  | 110.4     |
| C(40)-C(39)-H(39B)  | 110.4     |
| Si(3)-C(39)-H(39B)  | 110.4     |
| H(39A)-C(39)-H(39B) | 108.6     |
| C(32)-C(31)-C(36)   | 118.0(4)  |
| C(32)-C(31)-Si(1)   | 121.7(3)  |
| C(36)-C(31)-Si(1)   | 120.4(4)  |
| C(8)-B(1)-C(1)      | 113.2(3)  |
| C(8)-B(1)-C(20)     | 109.7(3)  |
| C(1)-B(1)-C(20)     | 111.6(3)  |
| C(8)-B(1)-Fe(1)     | 90.8(2)   |
| C(1)-B(1)-Fe(1)     | 128.0(3)  |
| C(20)-B(1)-Fe(1)    | 101.1(2)  |
| C(8)-B(1)-H(103)    | 106.7(18) |
| C(1)-B(1)-H(103)    | 110(2)    |
| C(20)-B(1)-H(103)   | 105.4(19) |
| Fe(1)-B(1)-H(103)   | 19.5(19)  |
| C(4)-C(3)-C(2)      | 119.9(5)  |
| C(4)-C(3)-H(3)      | 120.0     |
| C(2)-C(3)-H(3)      | 120.0     |
| C(31)-C(32)-C(33)   | 121.4(5)  |

|                   |       |
|-------------------|-------|
| C(31)-C(32)-H(32) | 119.3 |
| C(33)-C(32)-H(32) | 119.3 |

---

Symmetry transformations used to generate equivalent atoms:

Table S25. Crystal data and structure refinement for **8**.

|                                   |                                                                                                   |                 |
|-----------------------------------|---------------------------------------------------------------------------------------------------|-----------------|
| Identification code               | <b>8</b>                                                                                          |                 |
| Empirical formula                 | C <sub>56</sub> H <sub>67</sub> B Fe N <sub>2</sub> O <sub>2</sub> P <sub>2</sub> Si <sub>2</sub> |                 |
| Formula weight                    | 984.90                                                                                            |                 |
| Temperature                       | 100(2) K                                                                                          |                 |
| Wavelength                        | 0.71073 Å                                                                                         |                 |
| Crystal system                    | Triclinic                                                                                         |                 |
| Space group                       | P-1                                                                                               |                 |
| Unit cell dimensions              | a = 12.2122(7) Å                                                                                  | α = 88.967(3)°. |
|                                   | b = 13.2685(8) Å                                                                                  | β = 80.813(3)°. |
|                                   | c = 16.1433(12) Å                                                                                 | γ = 84.376(2)°. |
| Volume                            | 2569.8(3) Å <sup>3</sup>                                                                          |                 |
| Z                                 | 2                                                                                                 |                 |
| Density (calculated)              | 1.273 Mg/m <sup>3</sup>                                                                           |                 |
| Absorption coefficient            | 0.446 mm <sup>-1</sup>                                                                            |                 |
| F(000)                            | 1044                                                                                              |                 |
| Crystal size                      | 0.3 x 0.22 x 0.2 mm <sup>3</sup>                                                                  |                 |
| Theta range for data collection   | 1.96 to 44.14°.                                                                                   |                 |
| Index ranges                      | -23 ≤ h ≤ 23, -25 ≤ k ≤ 25, -31 ≤ l ≤ 31                                                          |                 |
| Reflections collected             | 310067                                                                                            |                 |
| Independent reflections           | 40098 [R(int) = 0.0425]                                                                           |                 |
| Completeness to theta = 44.14°    | 99.0 %                                                                                            |                 |
| Absorption correction             | None                                                                                              |                 |
| Refinement method                 | Full-matrix least-squares on F <sup>2</sup>                                                       |                 |
| Data / restraints / parameters    | 40098 / 585 / 627                                                                                 |                 |
| Goodness-of-fit on F <sup>2</sup> | 1.040                                                                                             |                 |
| Final R indices [I > 2σ(I)]       | R1 = 0.0371, wR2 = 0.1070                                                                         |                 |
| R indices (all data)              | R1 = 0.0607, wR2 = 0.1162                                                                         |                 |
| Largest diff. peak and hole       | 1.304 and -0.835 e.Å <sup>-3</sup>                                                                |                 |

Table S26. Atomic coordinates ( $\times 10^4$ ) and equivalent isotropic displacement parameters ( $\text{\AA}^2 \times 10^3$ ) for **8**.  $U(\text{eq})$  is defined as one third of the trace of the orthogonalized  $U^{\text{ij}}$  tensor.

|       | x        | y        | z       | $U(\text{eq})$ |
|-------|----------|----------|---------|----------------|
| Fe(1) | 3204(1)  | 1775(1)  | 1982(1) | 10(1)          |
| P(2)  | 1734(1)  | 52(1)    | 2541(1) | 10(1)          |
| P(1)  | 5031(1)  | 1497(1)  | 2400(1) | 11(1)          |
| Si(2) | 2609(1)  | 269(1)   | 673(1)  | 11(1)          |
| Si(1) | 2586(1)  | 3472(1)  | 599(1)  | 17(1)          |
| C(7)  | 4878(1)  | 2222(1)  | 3368(1) | 11(1)          |
| C(8)  | 3857(1)  | 2218(1)  | 3930(1) | 10(1)          |
| C(6)  | 1229(1)  | 1724(1)  | 5130(1) | 16(1)          |
| C(37) | 545(1)   | 877(1)   | 2998(1) | 14(1)          |
| N(2)  | 2472(1)  | 533(1)   | 1747(1) | 11(1)          |
| N(1)  | 2912(1)  | 3098(1)  | 1548(1) | 17(1)          |
| C(1)  | 1674(1)  | 2134(1)  | 4359(1) | 12(1)          |
| C(9)  | 3785(1)  | 2786(1)  | 4669(1) | 13(1)          |
| C(28) | 3791(1)  | -1014(1) | 4609(1) | 15(1)          |
| C(30) | 2639(1)  | -1354(1) | 3593(1) | 13(1)          |
| C(42) | -47(1)   | 599(1)   | 3771(1) | 18(1)          |
| C(25) | 2502(1)  | -320(1)  | 3392(1) | 11(1)          |
| C(3)  | 295(1)   | 3601(1)  | 4674(1) | 24(1)          |
| C(27) | 3619(1)  | 15(1)    | 4431(1) | 13(1)          |
| C(40) | -1360(1) | 2057(1)  | 3716(1) | 28(1)          |
| C(19) | 5586(1)  | 219(1)   | 2641(1) | 13(1)          |
| C(48) | 1271(1)  | 5(1)     | 337(1)  | 18(1)          |
| C(13) | 6186(1)  | 2014(1)  | 1718(1) | 13(1)          |
| C(26) | 2974(1)  | 409(1)   | 3829(1) | 11(1)          |
| C(41) | -1003(1) | 1187(1)  | 4126(1) | 24(1)          |
| C(38) | 182(1)   | 1745(1)  | 2584(1) | 18(1)          |
| C(31) | 1142(1)  | -1042(1) | 2201(1) | 14(1)          |
| C(5)  | 352(1)   | 2244(1)  | 5671(1) | 24(1)          |
| C(2)  | 1172(1)  | 3081(1)  | 4144(1) | 17(1)          |
| C(12) | 5722(1)  | 2800(1)  | 3525(1) | 14(1)          |
| C(29) | 3285(1)  | -1702(1) | 4195(1) | 15(1)          |

|        |         |          |          |       |
|--------|---------|----------|----------|-------|
| C(11)  | 5595(1) | 3382(1)  | 4250(1)  | 15(1) |
| C(23)  | 5651(1) | -1582(1) | 2387(1)  | 24(1) |
| C(20)  | 6349(1) | 19(1)    | 3199(1)  | 19(1) |
| C(18)  | 7296(1) | 1606(1)  | 1650(1)  | 19(1) |
| C(39)  | -777(1) | 2335(1)  | 2951(1)  | 26(1) |
| C(36)  | 1852(1) | -1876(1) | 1857(1)  | 17(1) |
| C(10)  | 4625(1) | 3359(1)  | 4832(1)  | 15(1) |
| C(24)  | 5238(1) | -589(1)  | 2240(1)  | 17(1) |
| C(4)   | -110(1) | 3185(1)  | 5443(1)  | 28(1) |
| C(33)  | -415(1) | -1817(1) | 1809(1)  | 26(1) |
| C(35)  | 1433(1) | -2669(1) | 1498(1)  | 23(1) |
| C(45)  | 2198(1) | 2338(1)  | 80(1)    | 20(1) |
| C(32)  | -1(1)   | -1020(1) | 2178(1)  | 19(1) |
| C(14)  | 5926(1) | 2873(1)  | 1246(1)  | 20(1) |
| C(16)  | 7870(1) | 2934(1)  | 684(1)   | 25(1) |
| C(34)  | 299(1)  | -2631(1) | 1465(1)  | 28(1) |
| C(47)  | 3709(1) | -792(1)  | 339(1)   | 18(1) |
| C(17)  | 8132(1) | 2070(1)  | 1134(1)  | 22(1) |
| C(46)  | 3082(1) | 1412(1)  | 74(1)    | 16(1) |
| C(44)  | 3808(1) | 3935(1)  | -111(1)  | 30(1) |
| C(22)  | 6410(1) | -1775(1) | 2940(1)  | 25(1) |
| C(21)  | 6756(1) | -975(1)  | 3344(1)  | 24(1) |
| C(15)  | 6767(1) | 3331(1)  | 734(1)   | 27(1) |
| O(1)   | 3108(1) | 5420(1)  | 2096(1)  | 43(1) |
| C(49)  | 2383(1) | 5497(1)  | 2881(1)  | 38(1) |
| C(52)  | 4238(1) | 5440(2)  | 2233(1)  | 52(1) |
| C(50)  | 3100(1) | 5320(1)  | 3558(1)  | 43(1) |
| C(51)  | 4216(1) | 5684(2)  | 3146(1)  | 32(1) |
| C(51A) | 4145(8) | 5178(15) | 3068(5)  | 51(4) |
| O(2)   | 2942(1) | 4429(1)  | 6652(1)  | 35(1) |
| C(54)  | 1629(1) | 4667(1)  | 7877(1)  | 43(1) |
| C(55)  | 1005(1) | 4611(1)  | 7127(1)  | 36(1) |
| C(53)  | 2802(1) | 4809(1)  | 7483(1)  | 39(1) |
| C(56)  | 1914(1) | 4722(2)  | 6373(1)  | 28(1) |
| C(56A) | 1850(8) | 4300(20) | 6420(10) | 56(5) |
| B(1)   | 2784(1) | 1639(1)  | 3756(1)  | 11(1) |



C(43)

1393(1)

4489(1)

676(1)

32(1)

---

Table S27. Bond lengths [Å] and angles [°] for **8**.

---

|              |            |
|--------------|------------|
| Fe(1)-N(1)   | 1.8996(7)  |
| Fe(1)-N(2)   | 2.0194(6)  |
| Fe(1)-P(1)   | 2.4248(2)  |
| Fe(1)-B(1)   | 2.8335(8)  |
| Fe(1)-H(101) | 1.813(12)  |
| P(2)-N(2)    | 1.6064(6)  |
| P(2)-C(37)   | 1.7964(7)  |
| P(2)-C(31)   | 1.8139(7)  |
| P(2)-C(25)   | 1.8177(7)  |
| P(1)-C(19)   | 1.8221(7)  |
| P(1)-C(7)    | 1.8240(7)  |
| P(1)-C(13)   | 1.8277(7)  |
| Si(2)-N(2)   | 1.7529(6)  |
| Si(2)-C(48)  | 1.8682(7)  |
| Si(2)-C(47)  | 1.8715(8)  |
| Si(2)-C(46)  | 1.8734(8)  |
| Si(1)-N(1)   | 1.6974(7)  |
| Si(1)-C(45)  | 1.8710(8)  |
| Si(1)-C(43)  | 1.8769(10) |
| Si(1)-C(44)  | 1.8783(10) |
| C(7)-C(12)   | 1.4005(9)  |
| C(7)-C(8)    | 1.4208(9)  |
| C(8)-C(9)    | 1.4095(9)  |
| C(8)-B(1)    | 1.6461(9)  |
| C(6)-C(1)    | 1.3991(10) |
| C(6)-C(5)    | 1.4011(11) |
| C(6)-H(6)    | 0.9500     |
| C(37)-C(38)  | 1.3918(11) |
| C(37)-C(42)  | 1.4014(11) |
| N(2)-N(1)    | 3.4974(9)  |
| N(1)-H(102)  | 0.68(2)    |
| C(1)-C(2)    | 1.4052(10) |
| C(1)-B(1)    | 1.6262(10) |
| C(9)-C(10)   | 1.3940(10) |

|              |            |
|--------------|------------|
| C(9)-H(9)    | 0.9500     |
| C(28)-C(29)  | 1.3879(10) |
| C(28)-C(27)  | 1.3922(10) |
| C(28)-H(28)  | 0.9500     |
| C(30)-C(29)  | 1.3911(10) |
| C(30)-C(25)  | 1.4045(9)  |
| C(30)-H(30)  | 0.9500     |
| C(42)-C(41)  | 1.3869(11) |
| C(42)-H(42)  | 0.9500     |
| C(25)-C(26)  | 1.4240(9)  |
| C(3)-C(4)    | 1.3871(15) |
| C(3)-C(2)    | 1.3929(11) |
| C(3)-H(3)    | 0.9500     |
| C(27)-C(26)  | 1.4093(9)  |
| C(27)-H(27)  | 0.9500     |
| C(40)-C(39)  | 1.3866(15) |
| C(40)-C(41)  | 1.3883(15) |
| C(40)-H(40)  | 0.9500     |
| C(19)-C(24)  | 1.3969(10) |
| C(19)-C(20)  | 1.4011(10) |
| C(48)-H(48A) | 0.9800     |
| C(48)-H(48B) | 0.9800     |
| C(48)-H(48C) | 0.9800     |
| C(13)-C(14)  | 1.3973(11) |
| C(13)-C(18)  | 1.3985(10) |
| C(26)-B(1)   | 1.6304(10) |
| C(41)-H(41)  | 0.9500     |
| C(38)-C(39)  | 1.3969(11) |
| C(38)-H(38)  | 0.9500     |
| C(31)-C(32)  | 1.4004(10) |
| C(31)-C(36)  | 1.4012(11) |
| C(5)-C(4)    | 1.3867(15) |
| C(5)-H(5)    | 0.9500     |
| C(2)-H(2)    | 0.9500     |
| C(12)-C(11)  | 1.3930(10) |
| C(12)-H(12)  | 0.9500     |

|              |            |
|--------------|------------|
| C(29)-H(29)  | 0.9500     |
| C(11)-C(10)  | 1.3922(10) |
| C(11)-H(11)  | 0.9500     |
| C(23)-C(22)  | 1.3895(14) |
| C(23)-C(24)  | 1.3932(11) |
| C(23)-H(23)  | 0.9500     |
| C(20)-C(21)  | 1.3926(12) |
| C(20)-H(20)  | 0.9500     |
| C(18)-C(17)  | 1.3965(11) |
| C(18)-H(18)  | 0.9500     |
| C(39)-H(39)  | 0.9500     |
| C(36)-C(35)  | 1.3892(11) |
| C(36)-H(36)  | 0.9500     |
| C(10)-H(10)  | 0.9500     |
| C(24)-H(24)  | 0.9500     |
| C(4)-H(4)    | 0.9500     |
| C(33)-C(34)  | 1.3848(15) |
| C(33)-C(32)  | 1.3962(11) |
| C(33)-H(33)  | 0.9500     |
| C(35)-C(34)  | 1.3910(15) |
| C(35)-H(35)  | 0.9500     |
| C(45)-C(46)  | 1.5542(11) |
| C(45)-H(45A) | 0.9900     |
| C(45)-H(45B) | 0.9900     |
| C(32)-H(32)  | 0.9500     |
| C(14)-C(15)  | 1.3936(12) |
| C(14)-H(14)  | 0.9500     |
| C(16)-C(17)  | 1.3842(14) |
| C(16)-C(15)  | 1.3880(14) |
| C(16)-H(16)  | 0.9500     |
| C(34)-H(34)  | 0.9500     |
| C(47)-H(47A) | 0.9800     |
| C(47)-H(47B) | 0.9800     |
| C(47)-H(47C) | 0.9800     |
| C(17)-H(17)  | 0.9500     |
| C(46)-H(46A) | 0.9900     |

|              |            |
|--------------|------------|
| C(46)-H(46B) | 0.9900     |
| C(44)-H(44A) | 0.9800     |
| C(44)-H(44B) | 0.9800     |
| C(44)-H(44C) | 0.9800     |
| C(22)-C(21)  | 1.3893(14) |
| C(22)-H(22)  | 0.9500     |
| C(21)-H(21)  | 0.9500     |
| C(15)-H(15)  | 0.9500     |
| O(1)-C(49)   | 1.4245(16) |
| O(1)-C(52)   | 1.4343(16) |
| C(49)-C(50)  | 1.5079(19) |
| C(49)-H(49A) | 0.9900     |
| C(49)-H(49B) | 0.9900     |
| C(52)-C(51)  | 1.510(2)   |
| C(52)-H(52A) | 0.9900     |
| C(52)-H(52B) | 0.9900     |
| C(50)-C(51)  | 1.5364(19) |
| C(50)-H(50A) | 0.9900     |
| C(50)-H(50B) | 0.9900     |
| C(51)-H(51A) | 0.9900     |
| C(51)-H(51B) | 0.9900     |
| O(2)-C(56)   | 1.4174(19) |
| O(2)-C(53)   | 1.4198(15) |
| C(54)-C(53)  | 1.4995(16) |
| C(54)-C(55)  | 1.5363(17) |
| C(54)-H(54A) | 0.9900     |
| C(54)-H(54B) | 0.9900     |
| C(55)-C(56)  | 1.527(2)   |
| C(55)-H(55A) | 0.9900     |
| C(55)-H(55B) | 0.9900     |
| C(53)-H(53A) | 0.9900     |
| C(53)-H(53B) | 0.9900     |
| C(56)-H(56A) | 0.9900     |
| C(56)-H(56B) | 0.9900     |
| B(1)-H(101)  | 1.183(12)  |
| C(43)-H(43A) | 0.9800     |

|                   |             |
|-------------------|-------------|
| C(43)-H(43B)      | 0.9800      |
| C(43)-H(43C)      | 0.9800      |
| N(1)-Fe(1)-N(2)   | 126.33(3)   |
| N(1)-Fe(1)-P(1)   | 112.75(2)   |
| N(2)-Fe(1)-P(1)   | 116.926(17) |
| N(1)-Fe(1)-B(1)   | 114.56(3)   |
| N(2)-Fe(1)-B(1)   | 96.97(2)    |
| P(1)-Fe(1)-B(1)   | 75.004(15)  |
| N(1)-Fe(1)-H(101) | 104.2(4)    |
| N(2)-Fe(1)-H(101) | 95.8(4)     |
| P(1)-Fe(1)-H(101) | 89.1(4)     |
| B(1)-Fe(1)-H(101) | 15.2(4)     |
| N(2)-P(2)-C(37)   | 113.77(3)   |
| N(2)-P(2)-C(31)   | 109.07(3)   |
| C(37)-P(2)-C(31)  | 104.29(3)   |
| N(2)-P(2)-C(25)   | 113.88(3)   |
| C(37)-P(2)-C(25)  | 106.10(3)   |
| C(31)-P(2)-C(25)  | 109.23(3)   |
| C(19)-P(1)-C(7)   | 106.44(3)   |
| C(19)-P(1)-C(13)  | 104.18(3)   |
| C(7)-P(1)-C(13)   | 104.21(3)   |
| C(19)-P(1)-Fe(1)  | 119.78(2)   |
| C(7)-P(1)-Fe(1)   | 103.56(2)   |
| C(13)-P(1)-Fe(1)  | 117.18(2)   |
| N(2)-Si(2)-C(48)  | 113.27(3)   |
| N(2)-Si(2)-C(47)  | 112.32(3)   |
| C(48)-Si(2)-C(47) | 109.88(4)   |
| N(2)-Si(2)-C(46)  | 108.07(3)   |
| C(48)-Si(2)-C(46) | 106.92(4)   |
| C(47)-Si(2)-C(46) | 105.96(4)   |
| N(1)-Si(1)-C(45)  | 107.72(4)   |
| N(1)-Si(1)-C(43)  | 113.04(5)   |
| C(45)-Si(1)-C(43) | 108.78(4)   |
| N(1)-Si(1)-C(44)  | 112.01(4)   |
| C(45)-Si(1)-C(44) | 106.73(5)   |

|                   |            |
|-------------------|------------|
| C(43)-Si(1)-C(44) | 108.33(5)  |
| C(12)-C(7)-C(8)   | 121.61(6)  |
| C(12)-C(7)-P(1)   | 120.61(5)  |
| C(8)-C(7)-P(1)    | 117.70(5)  |
| C(9)-C(8)-C(7)    | 115.35(6)  |
| C(9)-C(8)-B(1)    | 119.91(6)  |
| C(7)-C(8)-B(1)    | 124.72(5)  |
| C(1)-C(6)-C(5)    | 121.70(8)  |
| C(1)-C(6)-H(6)    | 119.1      |
| C(5)-C(6)-H(6)    | 119.1      |
| C(38)-C(37)-C(42) | 120.36(7)  |
| C(38)-C(37)-P(2)  | 121.44(6)  |
| C(42)-C(37)-P(2)  | 118.13(6)  |
| P(2)-N(2)-Si(2)   | 130.62(4)  |
| P(2)-N(2)-Fe(1)   | 115.76(3)  |
| Si(2)-N(2)-Fe(1)  | 113.00(3)  |
| P(2)-N(2)-N(1)    | 124.28(3)  |
| Si(2)-N(2)-N(1)   | 97.25(3)   |
| Fe(1)-N(2)-N(1)   | 25.950(15) |
| Si(1)-N(1)-Fe(1)  | 130.10(4)  |
| Si(1)-N(1)-N(2)   | 106.15(3)  |
| Fe(1)-N(1)-N(2)   | 27.722(15) |
| Si(1)-N(1)-H(102) | 112.5(18)  |
| Fe(1)-N(1)-H(102) | 117.4(18)  |
| N(2)-N(1)-H(102)  | 138.6(18)  |
| C(6)-C(1)-C(2)    | 116.52(6)  |
| C(6)-C(1)-B(1)    | 124.20(6)  |
| C(2)-C(1)-B(1)    | 119.02(6)  |
| C(10)-C(9)-C(8)   | 123.27(6)  |
| C(10)-C(9)-H(9)   | 118.4      |
| C(8)-C(9)-H(9)    | 118.4      |
| C(29)-C(28)-C(27) | 119.47(6)  |
| C(29)-C(28)-H(28) | 120.3      |
| C(27)-C(28)-H(28) | 120.3      |
| C(29)-C(30)-C(25) | 121.08(6)  |
| C(29)-C(30)-H(30) | 119.5      |

|                     |           |
|---------------------|-----------|
| C(25)-C(30)-H(30)   | 119.5     |
| C(41)-C(42)-C(37)   | 120.05(8) |
| C(41)-C(42)-H(42)   | 120.0     |
| C(37)-C(42)-H(42)   | 120.0     |
| C(30)-C(25)-C(26)   | 120.82(6) |
| C(30)-C(25)-P(2)    | 117.91(5) |
| C(26)-C(25)-P(2)    | 121.25(5) |
| C(4)-C(3)-C(2)      | 119.88(8) |
| C(4)-C(3)-H(3)      | 120.1     |
| C(2)-C(3)-H(3)      | 120.1     |
| C(28)-C(27)-C(26)   | 123.51(6) |
| C(28)-C(27)-H(27)   | 118.2     |
| C(26)-C(27)-H(27)   | 118.2     |
| C(39)-C(40)-C(41)   | 120.54(8) |
| C(39)-C(40)-H(40)   | 119.7     |
| C(41)-C(40)-H(40)   | 119.7     |
| C(24)-C(19)-C(20)   | 119.14(7) |
| C(24)-C(19)-P(1)    | 117.98(5) |
| C(20)-C(19)-P(1)    | 122.88(6) |
| Si(2)-C(48)-H(48A)  | 109.5     |
| Si(2)-C(48)-H(48B)  | 109.5     |
| H(48A)-C(48)-H(48B) | 109.5     |
| Si(2)-C(48)-H(48C)  | 109.5     |
| H(48A)-C(48)-H(48C) | 109.5     |
| H(48B)-C(48)-H(48C) | 109.5     |
| C(14)-C(13)-C(18)   | 119.09(7) |
| C(14)-C(13)-P(1)    | 117.06(5) |
| C(18)-C(13)-P(1)    | 123.85(6) |
| C(27)-C(26)-C(25)   | 115.65(6) |
| C(27)-C(26)-B(1)    | 116.72(5) |
| C(25)-C(26)-B(1)    | 127.49(6) |
| C(42)-C(41)-C(40)   | 119.60(8) |
| C(42)-C(41)-H(41)   | 120.2     |
| C(40)-C(41)-H(41)   | 120.2     |
| C(37)-C(38)-C(39)   | 119.02(8) |
| C(37)-C(38)-H(38)   | 120.5     |



|                   |           |
|-------------------|-----------|
| C(39)-C(38)-H(38) | 120.5     |
| C(32)-C(31)-C(36) | 118.87(7) |
| C(32)-C(31)-P(2)  | 121.11(6) |
| C(36)-C(31)-P(2)  | 119.53(5) |
| C(4)-C(5)-C(6)    | 120.16(8) |
| C(4)-C(5)-H(5)    | 119.9     |
| C(6)-C(5)-H(5)    | 119.9     |
| C(3)-C(2)-C(1)    | 122.22(8) |
| C(3)-C(2)-H(2)    | 118.9     |
| C(1)-C(2)-H(2)    | 118.9     |
| C(11)-C(12)-C(7)  | 120.88(6) |
| C(11)-C(12)-H(12) | 119.6     |
| C(7)-C(12)-H(12)  | 119.6     |
| C(28)-C(29)-C(30) | 119.37(6) |
| C(28)-C(29)-H(29) | 120.3     |
| C(30)-C(29)-H(29) | 120.3     |
| C(10)-C(11)-C(12) | 118.94(6) |
| C(10)-C(11)-H(11) | 120.5     |
| C(12)-C(11)-H(11) | 120.5     |
| C(22)-C(23)-C(24) | 120.02(8) |
| C(22)-C(23)-H(23) | 120.0     |
| C(24)-C(23)-H(23) | 120.0     |
| C(21)-C(20)-C(19) | 119.96(8) |
| C(21)-C(20)-H(20) | 120.0     |
| C(19)-C(20)-H(20) | 120.0     |
| C(17)-C(18)-C(13) | 120.05(8) |
| C(17)-C(18)-H(18) | 120.0     |
| C(13)-C(18)-H(18) | 120.0     |
| C(40)-C(39)-C(38) | 120.43(9) |
| C(40)-C(39)-H(39) | 119.8     |
| C(38)-C(39)-H(39) | 119.8     |
| C(35)-C(36)-C(31) | 120.83(8) |
| C(35)-C(36)-H(36) | 119.6     |
| C(31)-C(36)-H(36) | 119.6     |
| C(11)-C(10)-C(9)  | 119.85(6) |
| C(11)-C(10)-H(10) | 120.1     |

|                     |           |
|---------------------|-----------|
| C(9)-C(10)-H(10)    | 120.1     |
| C(23)-C(24)-C(19)   | 120.55(7) |
| C(23)-C(24)-H(24)   | 119.7     |
| C(19)-C(24)-H(24)   | 119.7     |
| C(5)-C(4)-C(3)      | 119.50(7) |
| C(5)-C(4)-H(4)      | 120.3     |
| C(3)-C(4)-H(4)      | 120.3     |
| C(34)-C(33)-C(32)   | 120.45(8) |
| C(34)-C(33)-H(33)   | 119.8     |
| C(32)-C(33)-H(33)   | 119.8     |
| C(36)-C(35)-C(34)   | 119.77(8) |
| C(36)-C(35)-H(35)   | 120.1     |
| C(34)-C(35)-H(35)   | 120.1     |
| C(46)-C(45)-Si(1)   | 112.61(5) |
| C(46)-C(45)-H(45A)  | 109.1     |
| Si(1)-C(45)-H(45A)  | 109.1     |
| C(46)-C(45)-H(45B)  | 109.1     |
| Si(1)-C(45)-H(45B)  | 109.1     |
| H(45A)-C(45)-H(45B) | 107.8     |
| C(33)-C(32)-C(31)   | 119.98(8) |
| C(33)-C(32)-H(32)   | 120.0     |
| C(31)-C(32)-H(32)   | 120.0     |
| C(15)-C(14)-C(13)   | 120.37(8) |
| C(15)-C(14)-H(14)   | 119.8     |
| C(13)-C(14)-H(14)   | 119.8     |
| C(17)-C(16)-C(15)   | 119.83(8) |
| C(17)-C(16)-H(16)   | 120.1     |
| C(15)-C(16)-H(16)   | 120.1     |
| C(33)-C(34)-C(35)   | 120.07(8) |
| C(33)-C(34)-H(34)   | 120.0     |
| C(35)-C(34)-H(34)   | 120.0     |
| Si(2)-C(47)-H(47A)  | 109.5     |
| Si(2)-C(47)-H(47B)  | 109.5     |
| H(47A)-C(47)-H(47B) | 109.5     |
| Si(2)-C(47)-H(47C)  | 109.5     |
| H(47A)-C(47)-H(47C) | 109.5     |

|                     |            |
|---------------------|------------|
| H(47B)-C(47)-H(47C) | 109.5      |
| C(16)-C(17)-C(18)   | 120.44(8)  |
| C(16)-C(17)-H(17)   | 119.8      |
| C(18)-C(17)-H(17)   | 119.8      |
| C(45)-C(46)-Si(2)   | 116.24(6)  |
| C(45)-C(46)-H(46A)  | 108.2      |
| Si(2)-C(46)-H(46A)  | 108.2      |
| C(45)-C(46)-H(46B)  | 108.2      |
| Si(2)-C(46)-H(46B)  | 108.2      |
| H(46A)-C(46)-H(46B) | 107.4      |
| Si(1)-C(44)-H(44A)  | 109.5      |
| Si(1)-C(44)-H(44B)  | 109.5      |
| H(44A)-C(44)-H(44B) | 109.5      |
| Si(1)-C(44)-H(44C)  | 109.5      |
| H(44A)-C(44)-H(44C) | 109.5      |
| H(44B)-C(44)-H(44C) | 109.5      |
| C(21)-C(22)-C(23)   | 119.78(8)  |
| C(21)-C(22)-H(22)   | 120.1      |
| C(23)-C(22)-H(22)   | 120.1      |
| C(22)-C(21)-C(20)   | 120.55(8)  |
| C(22)-C(21)-H(21)   | 119.7      |
| C(20)-C(21)-H(21)   | 119.7      |
| C(16)-C(15)-C(14)   | 120.19(9)  |
| C(16)-C(15)-H(15)   | 119.9      |
| C(14)-C(15)-H(15)   | 119.9      |
| C(49)-O(1)-C(52)    | 109.39(10) |
| O(1)-C(49)-C(50)    | 107.17(10) |
| O(1)-C(49)-H(49A)   | 110.3      |
| C(50)-C(49)-H(49A)  | 110.3      |
| O(1)-C(49)-H(49B)   | 110.3      |
| C(50)-C(49)-H(49B)  | 110.3      |
| H(49A)-C(49)-H(49B) | 108.5      |
| O(1)-C(52)-C(51)    | 107.93(10) |
| O(1)-C(52)-H(52A)   | 110.1      |
| C(51)-C(52)-H(52A)  | 110.1      |
| O(1)-C(52)-H(52B)   | 110.1      |

|                     |            |
|---------------------|------------|
| C(51)-C(52)-H(52B)  | 110.1      |
| H(52A)-C(52)-H(52B) | 108.4      |
| C(49)-C(50)-C(51)   | 102.94(10) |
| C(49)-C(50)-H(50A)  | 111.2      |
| C(51)-C(50)-H(50A)  | 111.2      |
| C(49)-C(50)-H(50B)  | 111.2      |
| C(51)-C(50)-H(50B)  | 111.2      |
| H(50A)-C(50)-H(50B) | 109.1      |
| C(52)-C(51)-C(50)   | 102.10(12) |
| C(52)-C(51)-H(51A)  | 111.4      |
| C(50)-C(51)-H(51A)  | 111.4      |
| C(52)-C(51)-H(51B)  | 111.3      |
| C(50)-C(51)-H(51B)  | 111.3      |
| H(51A)-C(51)-H(51B) | 109.2      |
| C(56)-O(2)-C(53)    | 104.79(12) |
| C(53)-C(54)-C(55)   | 104.15(10) |
| C(53)-C(54)-H(54A)  | 110.9      |
| C(55)-C(54)-H(54A)  | 110.9      |
| C(53)-C(54)-H(54B)  | 110.9      |
| C(55)-C(54)-H(54B)  | 110.9      |
| H(54A)-C(54)-H(54B) | 108.9      |
| C(56)-C(55)-C(54)   | 103.04(11) |
| C(56)-C(55)-H(55A)  | 111.2      |
| C(54)-C(55)-H(55A)  | 111.2      |
| C(56)-C(55)-H(55B)  | 111.2      |
| C(54)-C(55)-H(55B)  | 111.2      |
| H(55A)-C(55)-H(55B) | 109.1      |
| O(2)-C(53)-C(54)    | 106.73(9)  |
| O(2)-C(53)-H(53A)   | 110.4      |
| C(54)-C(53)-H(53A)  | 110.4      |
| O(2)-C(53)-H(53B)   | 110.4      |
| C(54)-C(53)-H(53B)  | 110.4      |
| H(53A)-C(53)-H(53B) | 108.6      |
| O(2)-C(56)-C(55)    | 106.30(12) |
| O(2)-C(56)-H(56A)   | 110.5      |
| C(55)-C(56)-H(56A)  | 110.5      |

|                     |           |
|---------------------|-----------|
| O(2)-C(56)-H(56B)   | 110.5     |
| C(55)-C(56)-H(56B)  | 110.5     |
| H(56A)-C(56)-H(56B) | 108.7     |
| C(1)-B(1)-C(26)     | 113.53(5) |
| C(1)-B(1)-C(8)      | 108.64(5) |
| C(26)-B(1)-C(8)     | 113.76(5) |
| C(1)-B(1)-Fe(1)     | 125.67(4) |
| C(26)-B(1)-Fe(1)    | 97.49(4)  |
| C(8)-B(1)-Fe(1)     | 96.70(4)  |
| C(1)-B(1)-H(101)    | 102.0(6)  |
| C(26)-B(1)-H(101)   | 109.9(6)  |
| C(8)-B(1)-H(101)    | 108.2(6)  |
| Fe(1)-B(1)-H(101)   | 23.7(6)   |
| Si(1)-C(43)-H(43A)  | 109.5     |
| Si(1)-C(43)-H(43B)  | 109.5     |
| H(43A)-C(43)-H(43B) | 109.5     |
| Si(1)-C(43)-H(43C)  | 109.5     |
| H(43A)-C(43)-H(43C) | 109.5     |
| H(43B)-C(43)-H(43C) | 109.5     |

---

<sup>1</sup> Frisch, M. J.; Trucks, G. W.; Schlegel, H. B.; Scuseria, G. E.; Robb, M. A.; Cheeseman, J. R.; Montgomery, J. A.; Vreven, T.; Kudin, K. N.; Burant, J. C.; Millam, J. M.; Iyengar, S. S.; Tomasi, J.; Barone, V.; Mennucci, B.; Cossi, M.; Scalmani, G.; Rega, N.; Petersson, G. A.; Nakatsuji, H.; Hada, M.; Ehara, M.; Toyota, K.; Fukuda, R.; Hasegawa, J.; Ishida, M.; Nakajima, T.; Honda, Y.; Kitao, O.; Nakai, H.; Klene, M.; Li, X.; Knox, J. E.; Hratchian, H. P.; Cross, J. B.; Adamo, C.; Jaramillo, J.; Gomperts, R.; Stratmann, R. E.; Yazyev, O.; Austin, A. J.; Cammi, R.; Pomelli, C.; Ochterski, J. W.; Ayala, P. Y.; Morokuma, K.; Voth, G. A.; Salvador, P.; Dannenberg, J. J.; Zakrzewski, V. G.; Dapprich, S.; Daniels, A. D.; Strain, M. C.; Farkas, O.; Malick, D. K.; Rabuck, A. D.; Raghavachari, K.; Foresman, J. B.; Ortiz, J. V.; Cui, Q.; Baboul, A. G.; Clifford, S.; Cioslowski, J.; Stefanov, B. B.; Liu, G.; Liashenko, A.; Piskorz, P.; Komaromi, I.; Martin, R. L.; Fox, D. J.; Keith, T.; Al-Laham, M. A.; Peng, C. Y.; Nanayakkara, A.; Challacombe, M.; Gill, P. M. W.; Johnson, B.; Chen, W.; Wong, M. W.; Gonzalez, C.; Pople, J. A. *Gaussian 03*; Revision B.05 ed.; Gaussian, Inc: Pittsburgh, PA, 2003.

<sup>2</sup> Moret, M.-E.; Peters, J. C. *J. Am. Chem. Soc.* **2011**, *133*, 18118–18121.

<sup>3</sup> Bontemps, S.; Gornitzka, H.; Bouhadir, G.; Miqueu, K.; Bourissou, D. *Angew. Chem. Int. Ed.* **2006**, *45*, 1611–1614.

<sup>4</sup> Sircoglou, M.; Bontemps, S.; Mercy, M.; Saffon, N.; Takahashi, M.; Bouhadir, G.; Maron, L.; Bourissou, D. *Angew. Chem. Int. Ed.* **2007**, *46*, 8583–8586.

<sup>5</sup> G. M. Sheldrick, *SHELXTL 2000*, Universität Göttingen: Göttingen, Germany, 2000.

<sup>6</sup> Kabsch, W. *J. Appl. Cryst.* **1993**, *26*, 795.

<sup>7</sup> Moret, M.-E.; Peters, J. C. *Angew. Chem. Int. Ed.* **2011**, *50*, 2063–2067.
